# Supplementary material for: A novel method to access chiral nonnatural 2,4-disubstituted pyrrolidines from aldehydes and nitroolefins only with an α-substituent
Source: Royal Society of Chemistry journal article supplement (doi:10.1039/c3cc40583d), 2013-01-01
Supplement: c3cc40583d.pdf [file c3cc40583d.pdf]

# A Novel Method to Access Chiral Nonnatural 2,4-Disubstituted Pyrrolidines from Aldehydes and Nitroolefins Only with $\alpha$ -Substituent

Bo Zheng,<sup>a,§</sup> Hui Wang,<sup>b,§</sup> Yong Han,<sup>a</sup> Changlu Liu<sup>b</sup> and Yungui Peng<sup>a,\*</sup>

<sup>a</sup> School of Chemistry and Chemical Engineering, Southwest University, Chongqing 400715, P.R. China.

Fax: 8623-68253157; Tel: 8623-68253157; E-mail: pengyungui@hotmail.com

<sup>b</sup> Department of Chemistry and Chemical Engineering, Sichuan University of Arts and Science, Dazhou 635000, P.R. China

## Table of Contents

|                                                                                                                               |    |
|-------------------------------------------------------------------------------------------------------------------------------|----|
| 1. General Methods.....                                                                                                       | 2  |
| 2. Synthesis of Chiral Catalysts.....                                                                                         | 2  |
| 3. Synthesis of $\alpha$ -Substituent Nitroolefins.....                                                                       | 3  |
| 4. Partial Results of Reaction Conditions Optimizations.....                                                                  | 4  |
| 5. General Procedures for Michael Additions of Aldehydes to Nitroolefins.....                                                 | 5  |
| 6. Determination of the Absolute Configuration of the Major Diastereomer.....                                                 | 5  |
| 7. Proposed Catalytic Cycle and Transition State Model.....                                                                   | 6  |
| 8. Characterization of the Michael Reaction Products.....                                                                     | 7  |
| 9. General Procedure for the Cascade Reduction/Cyclization Reaction: Synthesis of 2, 4-Disubstituted Pyrrolidines (8-10)..... | 11 |
| 10. References.....                                                                                                           | 12 |
| 11. NMR Spectra for New Catalysts and Part of the Michael Addition Products.....                                              | 13 |
| 12. Part of the HPLC Analysis Data.....                                                                                       | 38 |

## 1. General Methods

All solvents were purified by standard procedures and distilled prior to use. Reagents obtained from commercial source were used without further purification. Petroleum ether and ethyl acetate for flash column chromatography were distilled before use. All reactions were monitored by TLC with silica gel coated plates. Flash column chromatography was performed on silica gel H (10-40  $\mu$ ). NMR spectra were recorded on 300 MHz and 500 MHz instruments. Chemical shifts ( $\delta$ ) are given in ppm relative to TMS, coupling constants ( $J$ ) in Hz. Optical rotations were measured on a Perkin Elmer 341 Polarimeter at  $\lambda = 589$  nm. Analytical high performance liquid chromatography (HPLC) was carried out on WATERS 510 instrument (2487 Dual  $\lambda$  Absorbance Detector and 515 HPLC Pump) using chiral column. ESI HRMS was recorded on a Bruker Apex-2.

## 2. Synthesis of Chiral Catalysts

The synthesis of catalysts **1**, **3** from *L*-proline or (*L*)-4-hydroxy proline have been reported.<sup>[1, 2]</sup> The preparations of catalysts **2a-2d** and **4** were similar to catalyst **3**. Synthetic routine as follows:

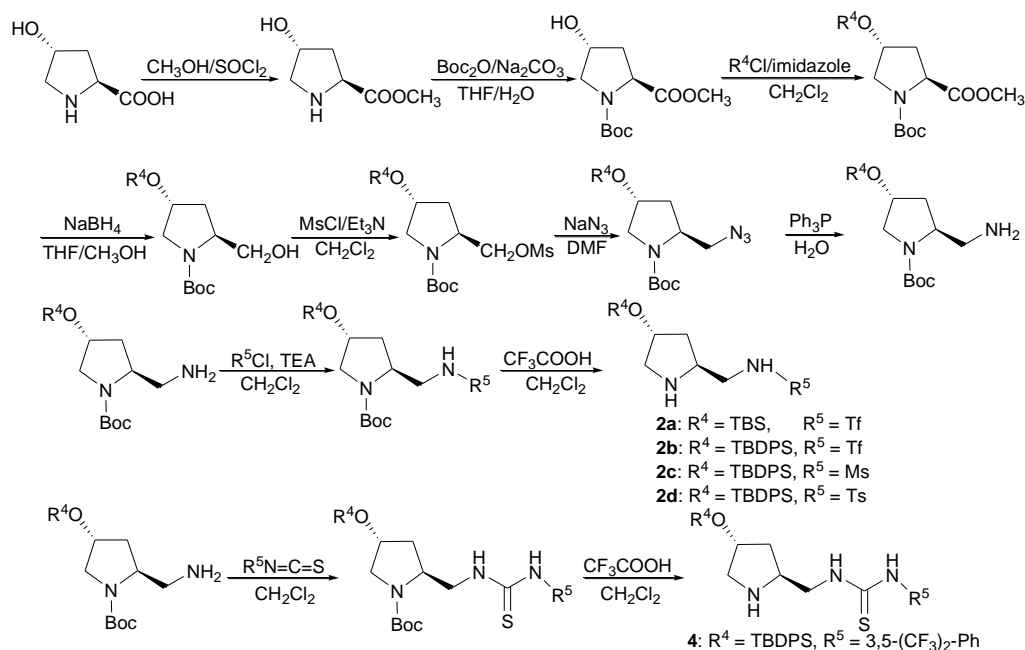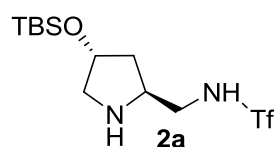

**N-(((2*S*, 4*R*)-4-(*tert*-butyldimethylsilyloxy)pyrrolidin-2-yl)methyl)-1, 1, 1-trifluoromethanesulfonamide (**2a**):** white solid, mp 144.3–146.5 °C;  $[\alpha]_D^{20} = +20.7^\circ$  ( $c = 1.0, \text{CHCl}_3$ );

$^1\text{H NMR}$  (300 MHz,  $\text{CDCl}_3$ )  $\delta$  8.06 (s, 2H), 4.52 (s, 1H), 4.13–3.78 (m, 1H), 3.47 (dd,  $J = 11.2, 6.8$  Hz, 2H), 3.36–3.19 (m, 1H), 3.12 (d,  $J = 12.2$  Hz, 1H), 1.95 (dd,  $J = 13.0, 5.8$  Hz, 1H), 1.74 (dd,  $J = 16.9, 6.6$  Hz, 1H), 0.87 (s, 9H), 0.03 (d,  $J = 20.8$  Hz, 6H) ppm;  $^{13}\text{C NMR}$  (75.5 MHz,  $\text{CDCl}_3$ )  $\delta$  123.4, 119.1, 77.4, 77.0, 76.6, 71.0, 60.7, 53.4, 46.6, 38.0, 25.5, 17.8, -5.0 ppm; HRMS (ESI-TOF) calcd. for  $\text{C}_{12}\text{H}_{25}\text{F}_3\text{N}_2\text{O}_3\text{Si}$   $[\text{M}+\text{H}]^+$  363.1385, found 363.1384.

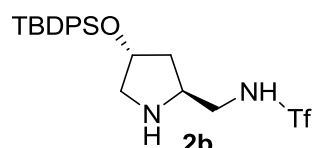

**N-(((2*S*,4*R*)-4-(*tert*-butyldiphenylsilyloxy)pyrrolidin-2-yl)methyl)-1, 1, 1-trifluoromethanesulfonamide (2b):** white solid, mp 148.8–150.3 °C;  $[\alpha]_D^{20} = +16.2^\circ$  ( $c = 1.0$ ,  $\text{CHCl}_3$ );  $^1\text{H NMR}$  (300 MHz,  $\text{CDCl}_3$ )  $\delta$  7.76–7.30 (m, 1H), 6.98 (s, 1H), 4.59–4.39 (m, 1H), 4.02 (dd,  $J = 17.2, 11.3$  Hz, 1H), 3.47–3.05 (m, 1H), 1.92 (dt,  $J = 16.1, 8.1$  Hz, 1H), 1.51 (dt,  $J = 32.6, 11.4$  Hz, 1H), 1.06 (s, 9H) ppm;  $^{13}\text{C NMR}$  (75.5 MHz,  $\text{CDCl}_3$ )  $\delta$  135.6, 132.9, 130.1, 127.9, 72.6, 60.3, 53.3, 47.0, 37.8, 26.8, 18.9 ppm; HRMS(ESI-TOF) calcd. for  $\text{C}_{22}\text{H}_{29}\text{F}_3\text{N}_2\text{O}_3\text{SSi}$   $[\text{M}+\text{H}]^+$  487.1698, found 487.1694.

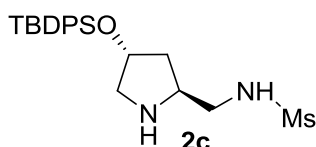

**N-(((2*S*,4*R*)-4-(*tert*-butyldiphenylsilyloxy)pyrrolidin-2-yl)methyl)methanesulfonamide (2c):** white solid, mp 146.5–148.0 °C;  $[\alpha]_D^{20} = +11.4^\circ$  ( $c = 1.0$ ,  $\text{CHCl}_3$ );  $^1\text{H NMR}$  (300 MHz,  $\text{CDCl}_3$ )  $\delta$  7.73–7.30 (m, 10H), 4.43 (s, 1H), 3.78 (ddd,  $J = 19.1, 10.3, 5.8$  Hz, 2H), 3.28 (dd,  $J = 13.1, 3.6$  Hz, 1H), 3.05–2.95 (m, 2H), 2.94 (s, 3H), 2.88 (dd,  $J = 12.2, 3.7$  Hz, 1H), 1.99–1.78 (m, 2H), 1.53 (ddd,  $J = 13.7, 9.1, 4.8$  Hz, 1H), 1.06 (s, 9H) ppm;  $^{13}\text{C NMR}$  (75.5 MHz,  $\text{CDCl}_3$ )  $\delta$  135.6, 133.4, 129.9, 127.8, 73.7, 68.0, 57.4, 54.3, 45.9, 40.0, 38.3, 26.8, 25.6, 19.0 ppm; HRMS(ESI-TOF) calcd. for  $\text{C}_{22}\text{H}_{32}\text{N}_2\text{O}_3\text{SSi}$   $[\text{M}+\text{H}]^+$  433.1981, found 433.1983.

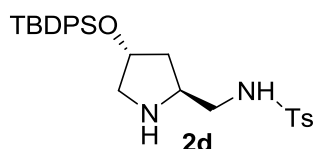

**N-(((2*S*,4*R*)-4-(*tert*-butyldiphenylsilyloxy)pyrrolidin-2-yl)methyl)-4-methylbenzenesulfonamide (2d):** white solid, mp 92.0–93.5 °C;  $[\alpha]_D^{20} = +5.4^\circ$  ( $c = 1.0$ ,  $\text{CHCl}_3$ );  $^1\text{H NMR}$  (300 MHz,  $\text{CDCl}_3$ )  $\delta$  7.70 (d,  $J = 8.2$  Hz, 2H), 7.63–7.30 (m, 10H), 7.23 (d,  $J = 5.9$  Hz, 2H), 4.48 (s, 1H), 4.21 (s, 1H), 3.41–3.02 (m, 4H), 2.38 (d,  $J = 11.6$  Hz, 3H), 2.05–1.69 (m, 4H), 1.03 (s, 9H) ppm;  $^{13}\text{C NMR}$  (75.5 MHz,  $\text{CDCl}_3$ )  $\delta$  143.5, 136.5, 135.6, 132.7, 132.5, 130.1, 129.7, 127.9, 127.0, 71.6, 59.0, 53.5, 43.2, 37.3, 26.7, 21.5, 18.9 ppm; HRMS (ESI-TOF) calcd. for  $\text{C}_{28}\text{H}_{36}\text{N}_2\text{O}_3\text{SSi}$   $[\text{M}+\text{H}]^+$  509.2294, found 509.2291.

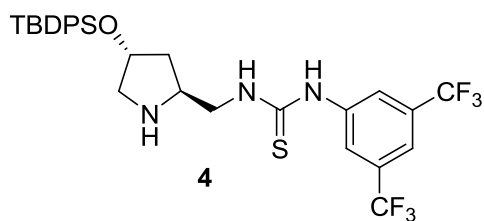

**1-(3,5-bis(trifluoromethyl)phenyl)-3-(((2*S*,4*R*)-4-(*tert*-butyldiphenylsilyloxy)pyrrolidin-2-yl)methyl)thiourea 4:** white solid, mp 85.7–84.8 °C;  $[\alpha]_D^{20} = +11.6^\circ$  ( $c = 1.0$ ,  $\text{CHCl}_3$ );  $^1\text{H NMR}$  (300 MHz,  $\text{CDCl}_3$ )  $\delta$  8.01 (s, 2H), 7.84–7.28 (m, 11H), 4.47 (s, 1H), 4.04–3.70 (m, 1H), 3.43 (d,  $J = 11.0$  Hz, 1H), 3.19 (dd,  $J = 48.7, 13.1$  Hz, 1H), 2.96 (d,  $J = 11.8$  Hz, 1H), 2.65 (d,  $J = 11.2$  Hz, 1H), 1.93 (dd,  $J = 24.0, 11.4$  Hz, 1H), 1.48 (tt,  $J = 15.3, 7.7$  Hz, 1H), 1.07 (s, 9H) ppm;  $^{13}\text{C NMR}$  (75.5 MHz,  $\text{CDCl}_3$ ):  $\delta$  18.9, 26.7, 26.8, 37.8, 47.0, 53.2, 60.3, 72.6, 77.2, 127.9, 130.0, 130.0, 132.8, 132.9, 135.5, 135.6 ppm; HRMS(ESI-TOF) calcd. for  $\text{C}_{30}\text{H}_{33}\text{F}_6\text{N}_3\text{O}_3\text{SSi}$   $[\text{M}+\text{H}]^+$  626.2096, found 626.2094.

### 3. Synthesis of $\alpha$ -Substituent Nitroolefins

The details of the synthesis of 2-nitroprop-1-ene see the reference,<sup>[3]</sup> the synthetic routine of others  $\alpha$ -substituent nitroolefins as follows:

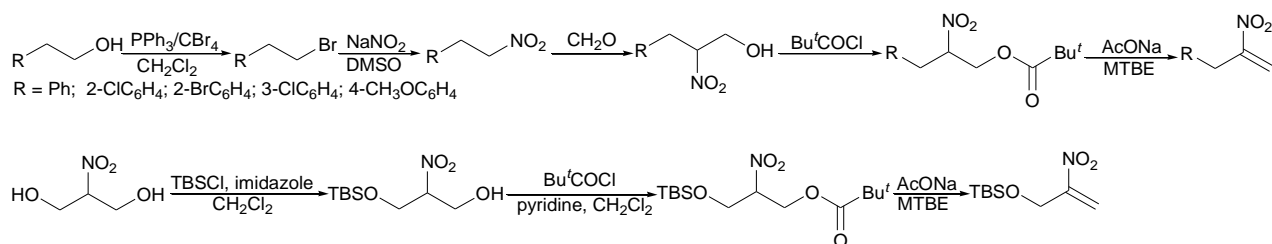

#### 4. Partial Results of Reaction Conditions Optimizations

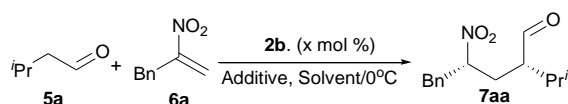

| Entry           | x  | Solvent                         | Additive                                                                  | Time (h) | Yield (%) <sup>b</sup> | Dr <sup>c</sup> | Ee (%) <sup>c</sup> |
|-----------------|----|---------------------------------|---------------------------------------------------------------------------|----------|------------------------|-----------------|---------------------|
| 1               | 20 | DMF                             | -                                                                         | 24       | 78                     | 96:4            | 95                  |
| 2               | 20 | Hexane                          | -                                                                         | 24       | 56                     | 93:7            | 96                  |
| 3               | 20 | Toluene                         | -                                                                         | 24       | 60                     | 90:10           | 95                  |
| 4               | 20 | <i>t</i> -BuOCH <sub>3</sub>    | -                                                                         | 24       | 62                     | 92:8            | 95                  |
| 5               | 20 | THF                             | -                                                                         | 24       | 70                     | 96:4            | 94                  |
| 6               | 20 | CH <sub>2</sub> Cl <sub>2</sub> | -                                                                         | 24       | 64                     | 88:12           | 75                  |
| 7               | 20 | CHCl <sub>3</sub>               | -                                                                         | 24       | 70                     | 87:13           | 71                  |
| 8               | 20 | CH <sub>3</sub> CN              | -                                                                         | 24       | 82                     | 88:12           | 74                  |
| 9               | 20 | <i>i</i> -PrOH                  | -                                                                         | 24       | 74                     | 91:9            | 82                  |
| 10              | 20 | CH <sub>3</sub> OH              | -                                                                         | 24       | 96                     | 80:20           | 52                  |
| 11              | 5  | DMF                             | <i>p</i> -NO <sub>2</sub> C <sub>6</sub> H <sub>4</sub> CO <sub>2</sub> H | 26       | 84                     | 96:4            | 95                  |
| 12 <sup>d</sup> | 5  | DMF                             | <i>p</i> -NO <sub>2</sub> C <sub>6</sub> H <sub>4</sub> CO <sub>2</sub> H | 26       | 92                     | 96:4            | 93                  |
| 13 <sup>e</sup> | 5  | DMF                             | <i>p</i> -NO <sub>2</sub> C <sub>6</sub> H <sub>4</sub> CO <sub>2</sub> H | 26       | 94                     | 95:5            | 92                  |
| 14 <sup>f</sup> | 5  | DMF                             | <i>p</i> -NO <sub>2</sub> C <sub>6</sub> H <sub>4</sub> CO <sub>2</sub> H | 26       | 94                     | 94:6            | 92                  |
| 15 <sup>g</sup> | 5  | DMF                             | <i>p</i> -NO <sub>2</sub> C <sub>6</sub> H <sub>4</sub> CO <sub>2</sub> H | 15       | 84                     | 90:10           | 93                  |
| 16 <sup>h</sup> | 5  | DMF                             | <i>p</i> -NO <sub>2</sub> C <sub>6</sub> H <sub>4</sub> CO <sub>2</sub> H | 41       | 74                     | 97:3            | 96                  |
| 17 <sup>i</sup> | 5  | DMF                             | <i>p</i> -NO <sub>2</sub> C <sub>6</sub> H <sub>4</sub> CO <sub>2</sub> H | 28       | 80                     | 96:4            | 95                  |
| 18 <sup>j</sup> | 5  | DMF                             | <i>p</i> -NO <sub>2</sub> C <sub>6</sub> H <sub>4</sub> CO <sub>2</sub> H | 75       | 70                     | 95:5            | 95                  |

<sup>a</sup> Unless specified, reactions conducted on a 0.2 mmol scale of nitroolefin in solvent (1 mL) with isovaleraldehyde (2.0 mmol) in the presence of catalyst and equal equivalence of acid was added at 0 °C. <sup>b</sup> Isolated yield. <sup>c</sup> Determined by chiral HPLC analysis. <sup>d</sup> 10% acid was added. <sup>e</sup> 25% acid was added. <sup>f</sup> 50% acid was added. <sup>g</sup> Reaction at 10 °C. <sup>h</sup> Reaction at -10 °C. <sup>i</sup> Isovaleraldehyde (1.0 mmol) was added. <sup>j</sup> Isovaleraldehyde (0.4 mmol) was added.

A series of solvents, including nonpolar (hexane, toluene), polar aprotic (*t*-BuOCH<sub>3</sub>, THF, CH<sub>2</sub>Cl<sub>2</sub>, CHCl<sub>3</sub>, CH<sub>3</sub>CN, DMF) and protic (*i*-PrOH, CH<sub>3</sub>OH), were screened in the reaction. Moderate to good yields and enantiomeric excesses were obtained (Table, entries 1-10), with the best result being achieved in DMF (Table, entry 1). The ratios of additive *p*-nitrobenzoic acid to catalyst **2b** also influenced the reactive performance; when the ratio increased from 1:1 to 2:1, 5:1 and 10:1, the yields increased significantly with almost unchanging diastereoselectivities, but the enantioselectivities decreased slightly from 95% *ee* to 92% *ee* (Table, entries 11–14). The reaction temperature was also investigated and it was found that when the reaction ran at -10 °C better diastereoselectivity (97:3) and enantioselectivity (96% *ee*) were obtained, but 41 h was needed to furnish the reaction and it only gave 74% yield (Table, entries 11, 15 and 16). So, 0 °C was selected as the best reaction temperature. We also optimized the influence of the amount of aldehyde on the reaction. When the reaction ran with a 5-fold excess of aldehyde, good results were obtained, but the yield decreased slightly from 84% to 80% (Table, entries 11, 17 and 18).

## 5. General Procedures for Michael Additions of Aldehydes to Nitroolefins

### 5.1 The Synthesis of the Racemic and Diastereomeric Product Mixtures:

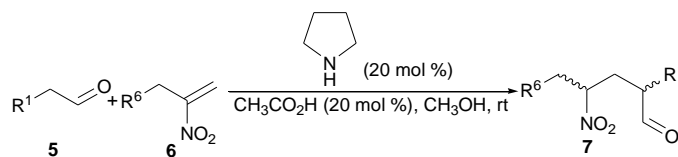

The pyrrolidine (20 mmol %), CH<sub>3</sub>CO<sub>2</sub>H (20 mmol %) and aldehyde **5** (1.0 mmol) was mixed in CH<sub>3</sub>OH (1 mL) at room temperature, after stirring for 15 min. and then the nitroolefin **6** (0.2 mmol) was added. The mixture was stirred at room temperature until the disappearance of the starting material monitored by TLC. The product was purified by silica gel column chromatography (petroleum ether and ethyl acetate as elution).

### 5.2 Catalytic Asymmetric Michael Additions of Aldehydes to Nitroolefins Only with $\alpha$ -Substituent:

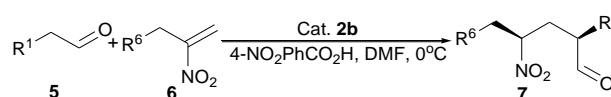

The catalyst **2b** (5 mol %), 4-O<sub>2</sub>NPhCO<sub>2</sub>H (5 mol %) and aldehyde **5** (1.0 mmol) were mixed in 1 mL DMF at room temperature, after stirring for 15 minutes and then cooling to 0°C, the nitroolefin **6** (0.2 mmol) was added. The mixture was stirred at 0°C until the disappearance of the starting material monitored by TLC. The product was purified by silica gel column chromatography (petroleum ether and ethyl acetate as elution).

Diastereomeric ratios and enantiomeric purity of the products were determined by comparison with the HPLC analysis using chiral column.

## 6. Determination of the Absolute Configuration of the Major Diastereomer

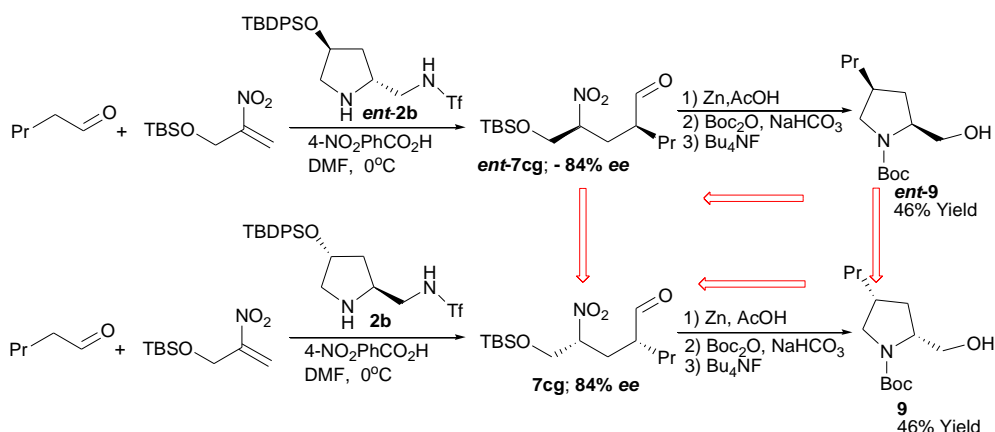

The absolute configuration of the obtained asymmetric Michael compound **ent-7cg** was determined via conversion to the corresponding *N*-Boc protected pyrrolidines **ent-9**. Compound **ent-9** has been reported previously by Goodman M. et al<sup>[4]</sup> and its NMR (<sup>1</sup>H, <sup>13</sup>C) and specific rotation\* were consistent with those reported. The relative configurations of the

remaining Michael adducts have been assigned by assumption of an identical reaction pathway. The absolute configurations of the remaining Michael adducts have been accordingly tentatively assigned.

**(2*S*, 4*S*)-*N*-*tert*-Butyloxycarbonyl-2-hydroxymethyl-4-propylpyrrolidine (*ent*-**9**):** (84% *ee*), colorless oil.  $[\alpha]_{\text{D}}^{20} = -36.5^{\circ}$  ( $c = 1.0$ ,  $\text{CHCl}_3$ );  $^1\text{H NMR}$  (300 MHz,  $\text{CDCl}_3$ )  $\delta$  5.35 (s, 1H), 3.88 (dd,  $J = 15.4, 7.5$  Hz, 1H), 3.58 (dt,  $J = 19.2, 10.6$  Hz, 3H), 2.74 (t,  $J = 10.5$  Hz, 1H), 2.10 (dt,  $J = 12.7, 6.2$  Hz, 1H), 1.93 (d,  $J = 32.6$  Hz, 1H), 1.43 (s, 9H), 1.26 (t,  $J = 10.4$  Hz, 4H), 0.99 (dt,  $J = 20.7, 10.4$  Hz, 1H), 0.87 (t,  $J = 6.5$  Hz, 3H) ppm;  $^{13}\text{C NMR}$  (75 MHz,  $\text{CDCl}_3$ )  $\delta$  157.0, 80.3, 67.9, 61.3, 53.3, 37.2, 35.6, 35.1, 28.4, 21.3, 14.2 ppm; HRMS (ESI-TOF) calcd. for  $\text{C}_{13}\text{H}_{25}\text{NO}_3$   $[\text{M}+\text{Na}]^+$  266.1732, found 266.1649;  $[\text{M}+\text{H}]^+$  244.1913, found 244.1905.

\* A non-racemic mixture of two enantiomers will have a net optical rotation. It is possible to determine the specific rotation of the mixture and with knowledge of the specific rotation of the optical purity, the pure specific rotation can be determined.

$$*\text{specific rotation } [\alpha]_{\text{D}}^{20} = \frac{[\alpha]_{\text{observed}}}{\text{optical purity}} = \frac{-36.5^{\circ}}{84\%} = -43.45^{\circ} \quad (\text{literature: } -43.5^{\circ})^{[4]}$$

## 7. Proposed Catalytic Cycle and Transition State Model

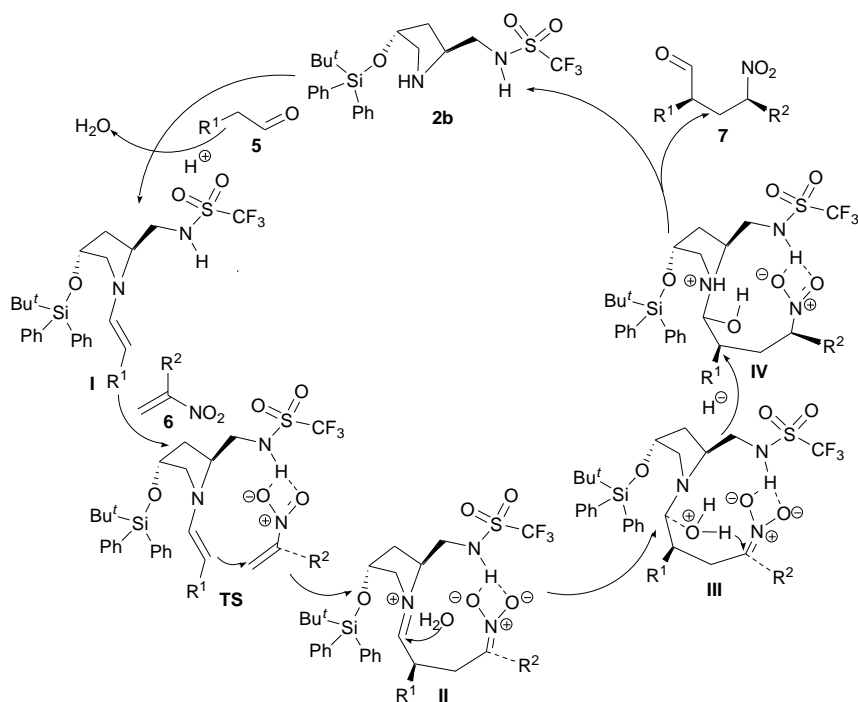

**Fig. 1** Proposed catalytic cycle and transition state model.

We have proposed a catalytic cycle and transition state model (**Fig. 1**).<sup>1c</sup> Firstly, the catalyst **2b** and aldehyde **5** react to form the enamine **I**, this procedure could be accelerated greatly in the presence of additional Brønsted acids. Then, the enamine **I** reacts with the nitroolefins **6** *via* the transition state (**TS**), in which, the hydrogen bond between the sulfonamide proton and the nitro group could activate the nitroolefins; The bulky group (–OTBDPS) should effectively shield the *re*-face of an enamine double bond, which would make the nucleophilic attack occur from the

nonshielded *si*-face to nitroolefin and afford the nitronate intermediate **II**. Here, the generated nitronate was thought to be stabilized by further coordination to the sulfonamide proton, thus slowing down any intermolecular protonation, especially from additional Brønsted acids, even slower than the rate of nucleophile attack of a water molecule to the iminium ion to give intermediate **III**. After the formation of intermediate **III**, protonation of the nitronate in an intramolecular manner in a six-member cycle transition state gives intermediate **IV**. Further hydrolysis to recycle the catalyst **2b** gives the observed major enantiomer of the products. This catalytic cycle and transition state model may explain the phenomenon that the presence of acid as additive only accelerated the reaction, while does not affect the diastereoselectivity of the process (Table 1, entries 3 and 10).

## 8. Characterization of the Michael Reaction Products

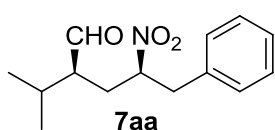

**(2S, 4R)-2-isopropyl-4-nitro-5-phenylpentanal (7aa)**: oil,  $[\alpha]_D^{20} = +23.8^\circ$  ( $c = 1.0$ ,  $\text{CHCl}_3$ );  $^1\text{H NMR}$  (300 MHz,  $\text{CDCl}_3$ )  $\delta$  9.66 (d,  $J = 1.5$  Hz, 1H), 7.25 (dddd,  $J = 29.7, 17.7, 5.9, 4.3$  Hz, 6H), 4.84–4.61 (m, 1H), 3.25 (dd,  $J = 14.2, 8.5$  Hz, 1H), 3.06 (dt,  $J = 14.2, 6.9$  Hz, 1H), 2.47 (dt,  $J = 15.0, 7.2$  Hz, 1H), 2.34–2.22 (m, 1H), 2.20–2.03 (m, 1H), 1.84 (ddd,  $J = 18.9, 12.2, 6.0$  Hz, 1H), 1.02–0.78 (m, 6H) ppm;  $^{13}\text{C NMR}$  (75.5 MHz,  $\text{CDCl}_3$ )  $\delta$  202.8, 135.1, 128.8, 127.5, 87.7, 54.0, 39.576, 28.7, 28.2, 19.4 ppm; HRMS (ESI-TOF) calcd. for  $\text{C}_{14}\text{H}_{19}\text{NO}_3$   $[\text{M}+\text{Na}]^+$  272.1263, found 272.1265; HPLC condition: Chiralpak AD-H, 221 nm, 1.0 mL/min, hexane/*i*-PrOH = 98/2,  $t_{\text{major}} = 36.09$  min,  $t_{\text{minor}} = 23.61$  min.  $ee = 95\%$ ,  $dr = 96:4$ .

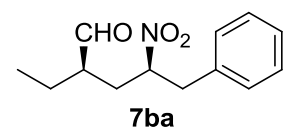

**(2R, 4R)-2-ethyl-4-nitro-5-phenylpentanal (7ba)**: oil,  $[\alpha]_D^{20} = +4.1^\circ$  ( $c = 1.0$ ,  $\text{CHCl}_3$ );  $^1\text{H NMR}$  (300 MHz,  $\text{CDCl}_3$ )  $\delta$  9.75–9.47 (m, 1H), 7.54–6.80 (m, 5H), 5.00–4.60 (m, 1H), 3.39–2.88 (m, 2H), 2.39–2.20 (m, 1H), 2.20–1.87 (m, 2H), 1.85–1.62 (m, 1H), 1.62–1.38 (m, 1H), 1.07–0.70 (m, 4H) ppm;  $^{13}\text{C NMR}$  (75.5 MHz,  $\text{CDCl}_3$ )  $\delta$  202.9, 135.0, 128.8, 127.5, 88.1, 49.3, 40.5, 31.4, 22.3, 10.9 ppm; HRMS (ESI-TOF) calcd. for  $\text{C}_{13}\text{H}_{17}\text{NO}_3$   $[\text{M}+\text{Na}]^+$  258.1106, found 258.1107; HPLC condition: Chiralpak AD-H, 221 nm, 1.0 mL/min, hexane/*i*-PrOH = 99/1,  $t_{\text{major}} = 30.11$  min,  $t_{\text{minor}} = 27.53$  min.  $ee = 93\%$ ,  $dr = 92:8$ .

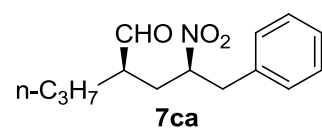

**(2R, 4R)-4-nitro-5-phenyl-2-propylpentanal (7ca)**: oil,  $[\alpha]_D^{20} = +6.5^\circ$  ( $c = 1.0$ ,  $\text{CHCl}_3$ );  $^1\text{H NMR}$  (300 MHz,  $\text{CDCl}_3$ )  $\delta$  9.61 (d,  $J = 9.4$  Hz, 1H), 7.25 (dt,  $J = 37.2, 6.5$  Hz, 5H), 4.97–4.66 (m, 1H), 3.26 (dt,  $J = 15.8, 7.9$  Hz, 1H), 3.05 (dd,  $J = 14.1, 5.8$  Hz, 1H), 2.59–2.21 (m, 2H), 1.88–1.73 (m, 1H), 1.73–1.44 (m, 2H), 1.41–1.13 (m, 2H), 0.90 (t,  $J = 7.2$  Hz, 3H) ppm;  $^{13}\text{C NMR}$  (75.5 MHz,  $\text{CDCl}_3$ )  $\delta$  202.5, 135.0, 128.8, 127.6, 87.2, 48.0, 40.1, 31.2, 30.2, 19.6, 14.0 ppm; HRMS (ESI-TOF) calcd. for  $\text{C}_{14}\text{H}_{19}\text{NO}_3$   $[\text{M}+\text{Na}]^+$  272.1263, found 272.1267; HPLC condition: Chiralpak IA, 221nm, 1.0 mL/min, hexane/*i*-PrOH = 99/1,  $t_{\text{major}} = 23.30$  min,  $t_{\text{minor}} = 17.50$  min.  $ee = 95\%$ ,  $dr = 94:6$ .

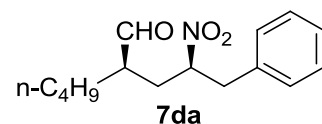

**(R)-2-((R)-2-nitro-3-phenylpropyl)hexanal (7da)**: oil,  $[\alpha]_D^{20} = +9.0^\circ$  ( $c = 1.0$ ,  $\text{CHCl}_3$ );  $^1\text{H NMR}$  (300 MHz,  $\text{CDCl}_3$ )  $\delta$  9.60 (t,  $J = 5.4$  Hz, 1H), 7.50–7.03 (m, 5H), 4.80 (dddd,  $J = 18.8, 13.9, 9.5, 4.6$  Hz, 1H), 3.27 (dt,  $J = 17.2, 8.6$  Hz, 1H), 3.05 (dd,  $J = 14.1, 6.0$  Hz, 1H),



2.41 (ddt,  $J = 25.6, 18.7, 5.9$  Hz, 2H), 1.81 (ddd,  $J = 14.4, 7.4, 4.5$  Hz, 1H), 1.74–1.46 (m, 2H), 1.40–1.09 (m, 4H), 0.87 (t,  $J = 7.1$  Hz, 3H) ppm;  $^{13}\text{C}$  NMR (75.5 MHz,  $\text{CDCl}_3$ )  $\delta$  202.5, 135.0, 128.9, 127.6, 87.2, 48.2, 40.1, 31.2, 28.4, 27.8, 22.6, 13.7 ppm; HRMS (ESI-TOF) calcd. for  $[\text{M}+\text{H}]^+$   $\text{C}_{15}\text{H}_{21}\text{NO}_3$  264.1600, found 264.1597; HPLC condition: Chiralpak AS-H, 221 nm, 0.5 mL/min, hexane/*i*-PrOH = 98/2,  $t_{\text{major}} = 32.43$  min,  $t_{\text{minor}} = 43.36$  min.  $ee = 90\%$ ,  $dr = 91:9$ .

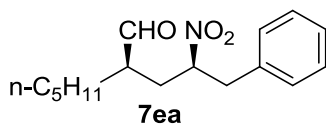

**(R)-2-((R)-2-nitro-3-phenylpropyl)heptanal (7ea):** oil,  $[\alpha]_{\text{D}}^{20} = +14.0^\circ$  ( $c = 1.0$ ,  $\text{CHCl}_3$ );  $^1\text{H}$  NMR (300 MHz,  $\text{CDCl}_3$ )  $\delta$  9.74–9.51 (m, 1H), 7.48–7.03 (m, 5H), 4.90–4.66 (m, 1H), 3.27 (dt,  $J = 17.4, 8.7$  Hz, 1H), 3.05 (dd,  $J = 14.1, 6.1$  Hz, 1H), 2.40

(ddt,  $J = 25.6, 18.4, 5.9$  Hz, 2H), 1.80 (ddd,  $J = 14.3, 7.3, 4.5$  Hz, 1H), 1.74–1.46 (m, 2H), 1.41–1.09 (m, 6H), 0.86 (t,  $J = 6.3$  Hz, 3H) ppm;  $^{13}\text{C}$  NMR (75.5 MHz,  $\text{CDCl}_3$ ):  $\delta$  202.5, 135.0, 128.8, 127.6, 87.2, 48.2, 40.1, 31.7, 31.1, 28.0, 26.0, 22.3 13.9 ppm; HRMS (ESI-TOF) calcd. for  $\text{C}_{16}\text{H}_{23}\text{NO}_3$   $[\text{M}+\text{Na}]^+$  300.1576, found 300.1577; HPLC condition: Chiralpak AS-H, 221 nm, 0.5 mL/min, hexane/*i*-PrOH = 98/2,  $t_{\text{major}} = 122.18$  min,  $t_{\text{minor}} = 26.22$  min.  $ee = 90\%$ ,  $dr = 91:9$ .

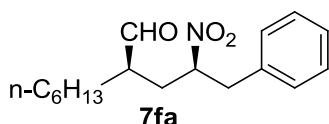

**(R)-2-((R)-2-nitro-3-phenylpropyl)octanal (7fa):** oil,  $[\alpha]_{\text{D}}^{20} = +13.6^\circ$  ( $c = 1.0$ ,  $\text{CHCl}_3$ );

$^1\text{H}$  NMR (300 MHz,  $\text{CDCl}_3$ )  $\delta$  9.62 (dd,  $J = 18.0, 8.4$  Hz, 1H), 7.48–7.01 (m, 5H), 4.95–4.65 (m, 1H), 3.27 (dt,  $J = 17.4, 8.7$  Hz, 1H), 3.05 (dd,  $J = 14.1, 6.0$  Hz, 1H), 2.55–2.26 (m, 2H), 1.80 (ddd,  $J = 14.3, 7.3, 4.5$  Hz, 1H), 1.74–1.47 (m, 2H), 1.46–1.03 (m, 8H), 0.87 (t,  $J = 6.4$  Hz, 3H) ppm;  $^{13}\text{C}$  NMR (75.5 MHz,  $\text{CDCl}_3$ ):  $\delta$  202.5, 135.0, 128.8, 127.6, 87.2, 48.2, 40.1, 31.4, 31.1, 29.2, 28.0, 26.2, 22.5, 14.0 ppm; HRMS (ESI-TOF) calcd. for  $\text{C}_{17}\text{H}_{25}\text{NO}_3$   $[\text{M}+\text{Na}]^+$  314.1732, found 314.1732; HPLC condition: Chiralpak AS-H, 221 nm, 0.5 mL/min, hexane/*i*-PrOH = 98/2,  $t_{\text{major}} = 21.32$  min,  $t_{\text{minor}} = 25.23$  min.  $ee = 91\%$ ,  $dr = 93:7$ .

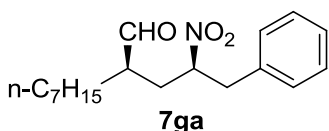

**(R)-2-((R)-2-nitro-3-phenylpropyl)nonanal (7ga):** oil,  $[\alpha]_{\text{D}}^{20} = +14.0^\circ$  ( $c = 1.0$ ,  $\text{CHCl}_3$ );

$^1\text{H}$  NMR (300 MHz,  $\text{CDCl}_3$ )  $\delta$  9.70–9.53 (m, 1H), 7.47–7.04 (m, 5H), 4.80 (dt,  $J = 18.1, 9.6, 4.7$  Hz, 1H), 3.27 (dt,  $J = 17.3, 8.7$  Hz, 1H), 3.05 (dd,  $J = 14.1, 6.1$  Hz, 1H), 2.40 (ddt,  $J = 25.5, 18.6, 5.9$  Hz, 2H), 1.80 (ddd,  $J = 14.4, 7.4, 4.5$  Hz, 1H), 1.74–1.50 (m, 2H), 1.24 (s, 10H), 0.88 (t,  $J = 6.7$  Hz, 3H) ppm;  $^{13}\text{C}$  NMR (75.5 MHz,  $\text{CDCl}_3$ ):  $\delta$  202.5, 135.0, 128.8, 127.5, 87.2, 48.2, 40.1, 31.6, 31.1, 29.5, 28.9, 28.1, 26.3, 22.6, 14.0 ppm; HRMS (ESI-TOF) calcd. for  $\text{C}_{18}\text{H}_{27}\text{NO}_3$   $[\text{M}+\text{Na}]^+$  328.1889, found 328.1889; HPLC condition: Chiralpak IC, 221 nm, 0.5 mL/min, hexane/*i*-PrOH = 98/2,  $t_{\text{major}} = 42.96$  min,  $t_{\text{minor}} = 55.41$  min.  $ee = 90\%$ ,  $dr = 91:9$ .

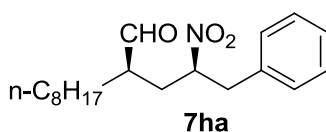

**(R)-2-((R)-2-nitro-3-phenylpropyl)decanal (7ha):** oil,  $[\alpha]_{\text{D}}^{20} = +14.2^\circ$  ( $c = 1.0$ ,  $\text{CHCl}_3$ );

$^1\text{H}$  NMR (300 MHz,  $\text{CDCl}_3$ )  $\delta$  9.60 (d,  $J = 10.5$  Hz, 1H), 7.44–7.06 (m, 5H), 4.91–4.64 (m, 1H), 3.27 (dt,  $J = 17.3, 8.7$  Hz, 1H), 3.05 (dd,  $J = 14.1, 6.0$  Hz, 1H), 2.40 (ddt,  $J = 29.4, 18.6, 6.0$  Hz, 2H), 1.80 (ddd,  $J = 14.3, 7.3, 4.5$  Hz, 1H), 1.62 (tdd,  $J = 22.2, 14.5, 8.1$  Hz, 2H), 1.21 (d,  $J = 17.6$  Hz, 10H), 0.88 (t,  $J = 6.6$  Hz, 3H) ppm;  $^{13}\text{C}$  NMR (75.5 MHz,  $\text{CDCl}_3$ ):  $\delta$  202.5,



135.0, 128.9, 128.8, 128.77, 127.6, 87.28, 48.2, 40.1, 31.8, 31.1, 29.5, 29.2, 28.1, 26.3, 22.6, 14.1 ppm; HRMS (ESI-TOF) calcd. for  $C_{19}H_{29}NO_3$   $[M+Na]^+$  342.2045, found 342.2046;  $[M-H]^-$  318.2069, found 318.301; HPLC condition: Chiralpak IC, 221 nm, 0.5 mL/min, hexane/*i*-PrOH = 98/2,  $t_{major}$  = 43.15 min,  $t_{minor}$  = 56.91 min. *ee* = 90%, *dr* = 91:9.

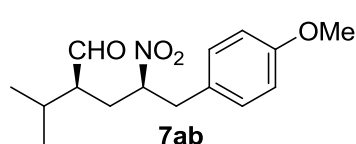

**(2*S*, 4*R*)-2-isopropyl-5-(4-methoxyphenyl)-4-nitropentanal (7ab):** oil,  $[\alpha]_D^{20}$  = +10.7° (*c* = 1.0,  $CHCl_3$ );  $^1H$  NMR (300 MHz,  $CDCl_3$ )  $\delta$  9.66 (d, *J* = 1.0 Hz, 1H), 7.15–6.71 (m, 4H), 4.80–4.58 (m, 1H), 3.77 (s, 3H), 3.26–2.93 (m, 2H), 2.53–2.36 (m, 1H), 2.36–2.19 (m, 1H), 2.20–2.00 (m, 1H), 1.85 (dt, *J* = 14.5, 5.3 Hz, 1H), 0.99–0.90

(m, 7H) ppm;  $^{13}C$  NMR (75.5 MHz,  $CDCl_3$ ):  $\delta$  203.0, 158.9, 129.9, 127.0, 114.2, 88.0, 55.2, 54.0, 38.8, 28.6, 28.2, 22.3, 19.4 ppm; HRMS (ESI-TOF) calcd. for  $C_{15}H_{21}NO_4$   $[M+Na]^+$  302.1368, found 302.1370;  $[M+H]^+$  280.1549, found 280.1404; HPLC condition: Chiralpak AD-H, 221 nm, 1.0 mL/min, hexane/*i*-PrOH = 98/2,  $t_{major}$  = 34.48 min,  $t_{minor}$  = 23.69 min. *ee* = 96%, *dr* = 96:4.

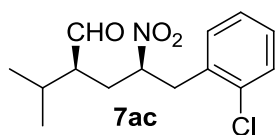

**(2*S*, 4*R*)-5-(2-chlorophenyl)-2-isopropyl-4-nitropentanal (7ac):** oil,  $[\alpha]_D^{20}$  = -8.6° (*c* = 1.0,  $CHCl_3$ );  $^1H$  NMR (300 MHz,  $CDCl_3$ )  $\delta$  9.70 (s, 1H), 7.24 (m, 4H), 4.97–4.74 (m, 1H), 3.26 (d, *J* = 9 Hz, 2H), 2.62–2.44 (m, 1H), 2.43–2.32 (m, 1H), 2.26–2.10 (m, 1H), 1.88 (m, 1H), 0.98 (dd, *J* = 12, 6 Hz, 6H) ppm;  $^{13}C$  NMR (75.5 MHz,  $CDCl_3$ )  $\delta$  202.6, 133.8, 133.0, 131.3, 129.8,

129.2, 127.3, 86.0, 53.8, 37.5, 29.0, 28.1, 19.3 ppm; HRMS (ESI-TOF) calcd. for  $C_{14}H_{18}ClNO_3$   $[M+Na]^+$  306.0873, found 305.1768. HPLC condition: Chiralpak AS-H, 221 nm, 0.5 mL/min, hexane/*i*-PrOH = 98/2,  $t_{major}$  = 24.70 min,  $t_{minor}$  = 28.47 min. *ee* = 92%, *dr* = 94:6.

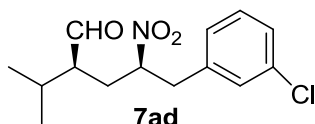

**(2*S*, 4*R*)-5-(3-chlorophenyl)-2-isopropyl-4-nitropentanal (7ad):** oil,  $[\alpha]_D^{20}$  = +13.8° (*c* = 1.0,  $CHCl_3$ );  $^1H$  NMR (300 MHz,  $CDCl_3$ )  $\delta$  9.64 (d, *J* = 1.4 Hz, 1H), 7.33–6.87 (m, 4H), 4.82–4.57 (m, 1H), 3.17 (dd, *J* = 14.4, 9.1 Hz, 1H), 3.06–2.94 (m, 1H), 2.51–2.35 (m, 1H), 2.35–2.22 (m, 1H), 2.20–2.00 (m, 1H), 1.97–1.72 (m, 1H), 1.00–0.83 (m, 6H) ppm;  $^{13}C$

NMR (75 MHz,  $CDCl_3$ )  $\delta$  202.8, 137.2, 134.6, 130.2, 129.0, 127.8, 127.0, 87.5, 54.0, 39.0, 28.8, 28.2, 19.5 ppm; HRMS (ESI-TOF) calcd. for  $C_{14}H_{18}ClNO_3$   $[M+Na]^+$  306.0873, found 306.0875; HPLC condition: Chiralpak AD-H, 254nm, 1.0 mL/min, hexane/*i*-PrOH = 98/2,  $t_{major}$  = 40.01 min,  $t_{minor}$  = 18.56 min. *ee* = 93%, *dr* = 99:1.

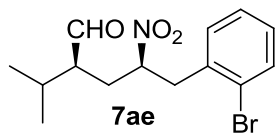

**(2*S*, 4*R*)-5-(2-bromophenyl)-2-isopropyl-4-nitropentanal (7ae):** oil,  $[\alpha]_D^{20}$  = -14.3° (*c* = 1.0,  $CHCl_3$ );  $^1H$  NMR (300 MHz,  $CDCl_3$ )  $\delta$  9.70 (s, 1H), 7.24 (dddd, *J* = 19.4, 17.9, 9.1, 2.1 Hz, 4H), 4.99–4.76 (m, 1H), 3.36–3.12 (m, 2H), 2.61–2.45 (m, 1H), 2.44–2.32 (m, 1H), 2.28–2.09 (m, 1H), 1.88 (dt, *J* = 14.5, 5.4 Hz, 1H), 1.06–0.86 (m, 6H) ppm;  $^{13}C$  NMR (75.5 MHz,

$CDCl_3$ )  $\delta$  202.5, 134.7, 133.1, 131.3, 129.4, 127.9, 124.2, 86.2, 53.8, 39.8, 28.9, 28.1, 19.3 ppm; HRMS (ESI-TOF) calcd. for  $C_{14}H_{18}BrNO_3$   $[M+Na]^+$  350.0368, found 350.0369; HPLC condition: Chiralpak IA, 221 nm, 1.0 mL/min, hexane/*i*-PrOH = 98/2,  $t_{major}$  = 23.04 min,  $t_{minor}$  = 32.70 min. *ee* = 91%, *dr* = 94:6.

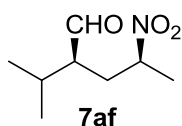

**(2*S*, 4*S*)-2-isopropyl-4-nitropentanal (7af):** oil,  $[\alpha]_D^{20}$  = +90.4° (*c* = 1.0,  $CHCl_3$ );  $^1H$  NMR (300

MHz, CDCl<sub>3</sub>)  $\delta$  9.69 (t,  $J$  = 5.8 Hz, 1H), 4.76–4.51 (m, 1H), 2.55–2.37 (m, 1H), 2.35–2.06 (m, 1H), 1.89–1.71 (m, 1H), 1.52 (d,  $J$  = 6.7 Hz, 3H), 1.00 (t,  $J$  = 6.4 Hz, 6H) ppm; <sup>13</sup>C NMR (75.5 MHz, CDCl<sub>3</sub>):  $\delta$  202.9, 81.2, 53.9, 30.1, 28.3, 19.7, 19.3, 18.7 ppm; HRMS (ESI-TOF) calcd. for C<sub>8</sub>H<sub>15</sub>NO<sub>3</sub> [M+Na]<sup>+</sup> 196.0950, found 196.0950; [M-H]<sup>+</sup> 172.0974, found 172.1321; HPLC condition: Chiralpak IA, 221 nm, 1.0 mL/min, hexane/*i*-PrOH = 98/2,  $t_{\text{major}}$  = 31.83 min,  $t_{\text{minor}}$  = 29.83 min.  $ee$  = 98%,  $dr$  = 94:6.

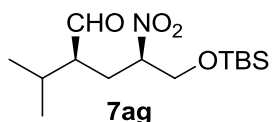

**(2S, 4R)-5-(tert-butyldimethylsilyloxy)-2-isopropyl-4-nitropentanal (7ag):** oil,  $[\alpha]_{\text{D}}^{20}$  = +

14.6° (c = 1.0, CHCl<sub>3</sub>); <sup>1</sup>H NMR (300 MHz, CDCl<sub>3</sub>)  $\delta$  9.76–9.58 (m, 1H), 4.66–4.45 (m, 1H), 4.01–3.82 (m, 2H), 2.42–2.04 (m, 3H), 2.06–1.80 (m, 1H), 1.04–0.94 (m, 6H), 0.84 (d,  $J$  = 6.3

Hz, 9H), 0.03 (d,  $J$  = 11.8 Hz, 6H) ppm; <sup>13</sup>C NMR (75 MHz, CDCl<sub>3</sub>)  $\delta$  203.2, 86.9, 63.3, 53.9,

28.3, 25.6, 24.5, 19.7, 19.4, 18.1, -5.7 ppm; HRMS (ESI-TOF) calcd. for C<sub>14</sub>H<sub>29</sub>NO<sub>4</sub>Si [M+Na]<sup>+</sup> 326.1764, found 326.1769; [M-H]<sup>+</sup> 302.1788, found 302.1392; HPLC condition: Chiralpak IC, 218 nm, 0.25 mL/min, hexane/*i*-PrOH = 96/4,  $t_{\text{major}}$  = 64.01 min,  $t_{\text{minor}}$  = 35.55 min.  $ee$  = 98%,  $dr$  = 89:11.

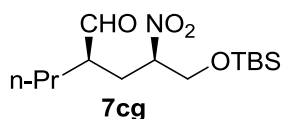

**(2R, 4R)-5-(tert-butyldimethylsilyloxy)-4-nitro-2-propylpentanal (7cg):** oil,  $[\alpha]_{\text{D}}^{20}$  =

+12.6° (c = 1.0, CHCl<sub>3</sub>); <sup>1</sup>H NMR (500 MHz, CDCl<sub>3</sub>)  $\delta$  9.63 (d,  $J$  = 19.0 Hz, 1H), 4.62 (s, 1H), 4.17–3.77 (m, 2H), 2.61–2.26 (m, 2H), 1.91–1.77 (m, 1H), 1.59 (dd,  $J$  = 47.3, 38.9 Hz,

2H), 1.34 (dt,  $J$  = 52.0, 26.1 Hz, 2H), 0.94 (t,  $J$  = 6.5 Hz, 3H), 0.84 (s, 9H), 0.03 (s, 6H) ppm;

<sup>13</sup>C NMR (126 MHz, CDCl<sub>3</sub>)  $\delta$  202.8, 86.9, 64.1, 48.0, 30.7, 27.6, 25.8, 20.0, 18.3, 14.2, -5.5 ppm; HRMS (ESI-TOF) calcd. for C<sub>14</sub>H<sub>29</sub>NO<sub>4</sub>Si [M+Na]<sup>+</sup> 326.1764, found 326.1765; HPLC condition: Chiralpak IC, 218 nm, 0.25 mL/min, hexane/*i*-PrOH=96/4,  $t_{\text{major}}$  = 61.721 min,  $t_{\text{minor}}$  = 38.802 min,  $ee$  = 84%,  $dr$  = 80:20.

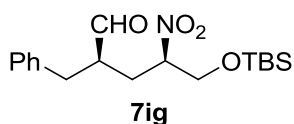

**(2R, 4R)-2-benzyl-5-(tert-butyldimethylsilyloxy)-4-nitropentanal (7ig):** oil,  $[\alpha]_{\text{D}}^{20}$  =

+7.57° (c = 1.0, CHCl<sub>3</sub>); <sup>1</sup>H NMR (300 MHz, CDCl<sub>3</sub>):  $\delta$  9.68 (d,  $J$  = 0.9 Hz, 1H), 7.35–7.24 (m, 3H), 7.16 (d,  $J$  = 6.9 Hz, 2H), 4.65–4.48 (m, 1H), 3.98–3.80 (m, 2H), 3.04 (dd,  $J$  = 14.0,

7.4 Hz, 1H), 2.92–2.81 (m, 1H), 2.79–2.66 (m, 1H), 2.46–2.26 (m, 1H), 1.87–1.69 (m, 1H),

0.84 (s, 9H), 0.01 (d,  $J$  = 1.3 Hz, 6H) ppm; <sup>13</sup>C NMR (75 MHz, CDCl<sub>3</sub>):  $\delta$  202.0, 137.1, 128.9, 127.0, 86.8, 63.8, 49.7, 35.0, 27.4, 25.6, -5.7 ppm; HRMS (ESI-TOF) calcd. for C<sub>18</sub>H<sub>29</sub>NO<sub>4</sub>Si [M+Na]<sup>+</sup> 374.1764, found 374.1744; HPLC condition: Chiralpak IC, 218 nm, 0.5 mL/min, hexane/*i*-PrOH=96/4,  $t_{\text{major}}$  = 44.482 min,  $t_{\text{minor}}$  = 33.678 min,  $ee$  = 70%,  $dr$  = 86:14.

## 9. General Procedure for the Cascade Reduction/Cyclization Reaction: Synthesis of 2,4-Disubstituted Pyrrolidines (8-10):

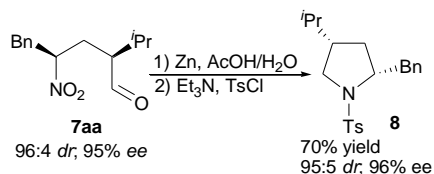

Zn (5.0 mmol) was added in small portions over a period of 2 min to a solution of the nitroaldehyde **7aa** (0.2 mmol) in H<sub>2</sub>O/AcOH (1:1; 5 mL) at 0°C. The reaction mixture was stirred for 1.5 h at rt, then filtered, and the filtrate was adjusted to pH = 12 with 4 M NaOH. The aqueous layer was extracted with CH<sub>2</sub>Cl<sub>2</sub> (3×10 mL). The organic layers were combined, dried over Na<sub>2</sub>SO<sub>4</sub>, and the solvent was removed in vacuo. The crude product was dissolved in CH<sub>2</sub>Cl<sub>2</sub> (2 mL), cooled to 0°C and treated with triethylamine (2 equiv.) followed by *p*-toluenesulfonyl chloride (1.5 equiv.) for 6 h. After aqueous workup, the organic concentrate was purified by silica gel column chromatography to afford **8** (70 % yield from **7aa**).

**Compound 8**: white solid. mp 75.4–76.2 °C; [ $\alpha$ ]<sub>D</sub><sup>20</sup> = + 85.7° (c = 1.0, CHCl<sub>3</sub>); <sup>1</sup>H NMR (300 MHz, CDCl<sub>3</sub>)  $\delta$  0.59 (m, 6H), 0.85–1.20 (m, 1H), 1.22–1.27 (m, 2H), 1.79–1.85 (s, 3H), 2.43–2.89 (m, 2H), 3.40–3.71 (m, 3H), 7.19–7.77 (m, 9H) ppm; <sup>13</sup>C NMR (75.5 MHz, CDCl<sub>3</sub>)  $\delta$  21.0, 21.2, 21.5, 31.2, 36.9, 42.9, 45.4, 53.9, 62.3, 126.3, 127.4, 127.5, 128.3, 128.4, 129.5, 129.6, 129.6, 129.7, 135.2, 138.2, 141.3 ppm; HRMS (ESI-TOF) calcd. For C<sub>21</sub>H<sub>27</sub>NO<sub>2</sub>S [M+Na]<sup>+</sup> 380.1660, found 380.1673; HPLC condition: Chiralpak IC, 221 nm, 1.0 mL/min, hexane/*i*-PrOH = 98/2, *t*<sub>major</sub> = 42.67 min, *t*<sub>minor</sub> = 79.92 min. *ee* = 96%, *dr* = 96:4.

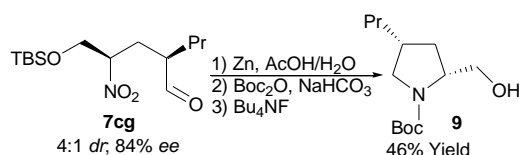

**Compound 9**: oil. [ $\alpha$ ]<sub>D</sub><sup>20</sup> = + 32.89° (c = 1.0, CHCl<sub>3</sub>); <sup>1</sup>H NMR (500 MHz, CDCl<sub>3</sub>):  $\delta$  5.28 (s, 1H), 3.88 (s, 1H), 3.60–3.65 (m, 3H), 3.53 (d, *J* = 8.0 Hz, 1H), 2.76 (t, 1H), 2.12 (t, 1H), 2.01 (s, 1H), 1.44 (s, 9H), 1.40 (m, 4H), 1.01–1.07 (m, 1H), 0.87 (s, 3H) ppm; <sup>13</sup>C NMR (126 MHz, CDCl<sub>3</sub>)  $\delta$  14.1, 21.3, 28.4, 35.1, 35.6, 53.3, 61.6, 67.3, 80.2, 156.9 ppm; HRMS (ESI-TOF) calcd. for C<sub>13</sub>H<sub>25</sub>NO<sub>3</sub> [M+Na]<sup>+</sup> 266.1732, found 266.1649; [M+H]<sup>+</sup> 244.1913, found 244.1905.

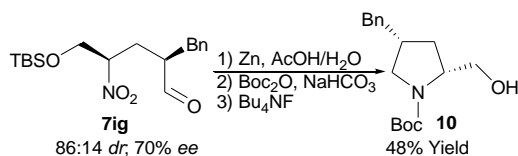

**Compound 10**: oil. [ $\alpha$ ]<sub>D</sub><sup>20</sup> = +39.3° (c = 1.0, CHCl<sub>3</sub>); <sup>1</sup>H NMR (300 MHz, CDCl<sub>3</sub>):  $\delta$  7.39–7.07 (m, 5H), 5.33 (d, *J* = 6.2 Hz, 1H), 3.91 (dd, *J* = 15.4, 7.3 Hz, 1H), 3.76–3.49 (m, 3H), 2.93 (t, *J* = 10.6 Hz, 1H), 2.77–2.51 (m, 2H), 2.40–2.22 (m, 1H), 2.08 (dt, *J* = 12.3, 6.2 Hz, 1H), 1.46 (d, *J* = 4.8 Hz, 9H), 1.28–1.07 (m, 1H) ppm; <sup>13</sup>C NMR (75 MHz, CDCl<sub>3</sub>):  $\delta$  157.0, 140.0, 128.7, 128.6, 128.5, 126.3, 80.5, 67.8, 61.3, 53.0, 39.0, 35.3, 28.5 ppm; HRMS (ESI-TOF) calcd. for

$C_{17}H_{25}NO_3$   $[M+Na]^+$  314.1732, found 314.1728.

## 10. References

- [1] (a) Wang, W.; Wang, J.; Li, H. *Angew. Chem. Int. Ed.* 2005, **44**, 1369. (b) Zu, L. S.; Wang, J.; Li, H.; Wang, W. *Org. Lett.* 2006, **8**, 3077. (c) Wang, J.; Li, H.; Lou, B.; Zu, L.; Guo, H.; Wang, W. *Chem. Eur. J.* 2006, **12**, 4321.
- [2] Wang, C.; Yu, C.; Liu, C. L.; Peng, Y. G. *Tetrahedron Lett.* 2009, **50**, 2363.
- [3] Miyashita, T.; Yanami, A.; Yoshikoshi, A. *Org. Syn.* 1990, Coll. **7**, 396; 1981, **60**, 101.
- [4] Del Valle, J. R.; Goodman, M. *J. Org. Chem.* 2003, **68**, 3923.

## 11. NMR Spectra for New Catalysts and Part of the Michael Addition Products

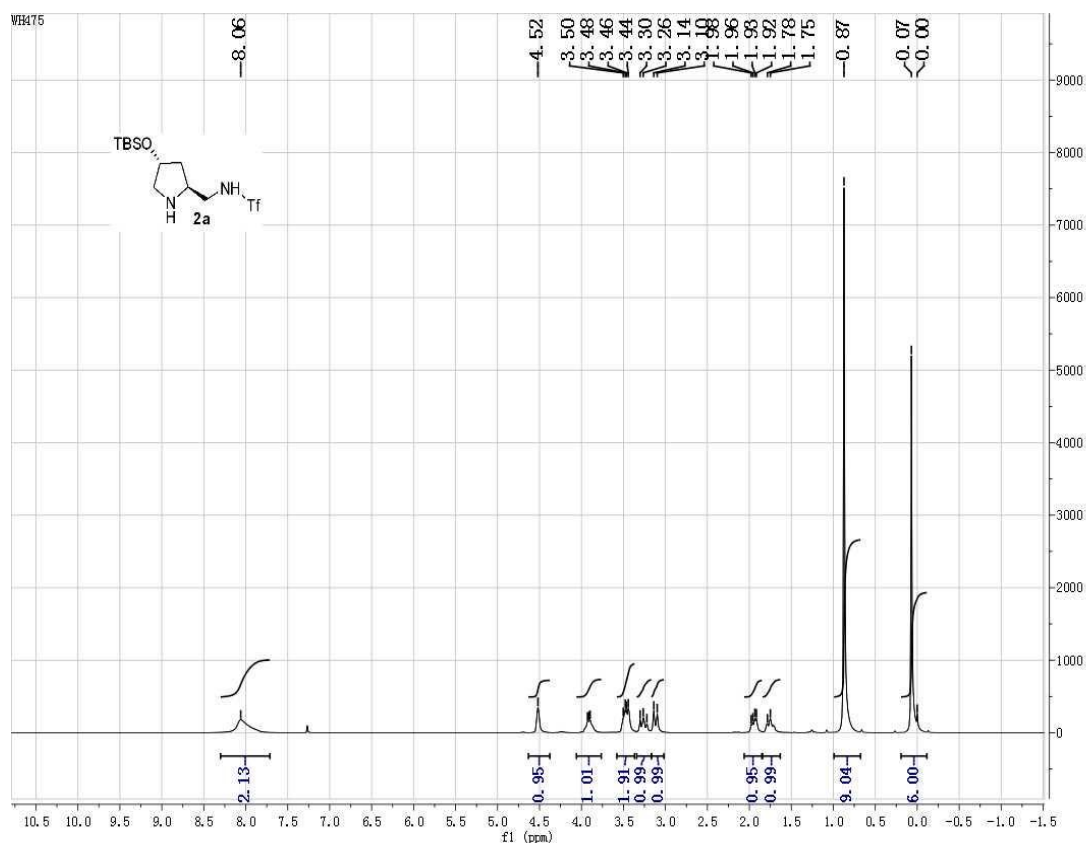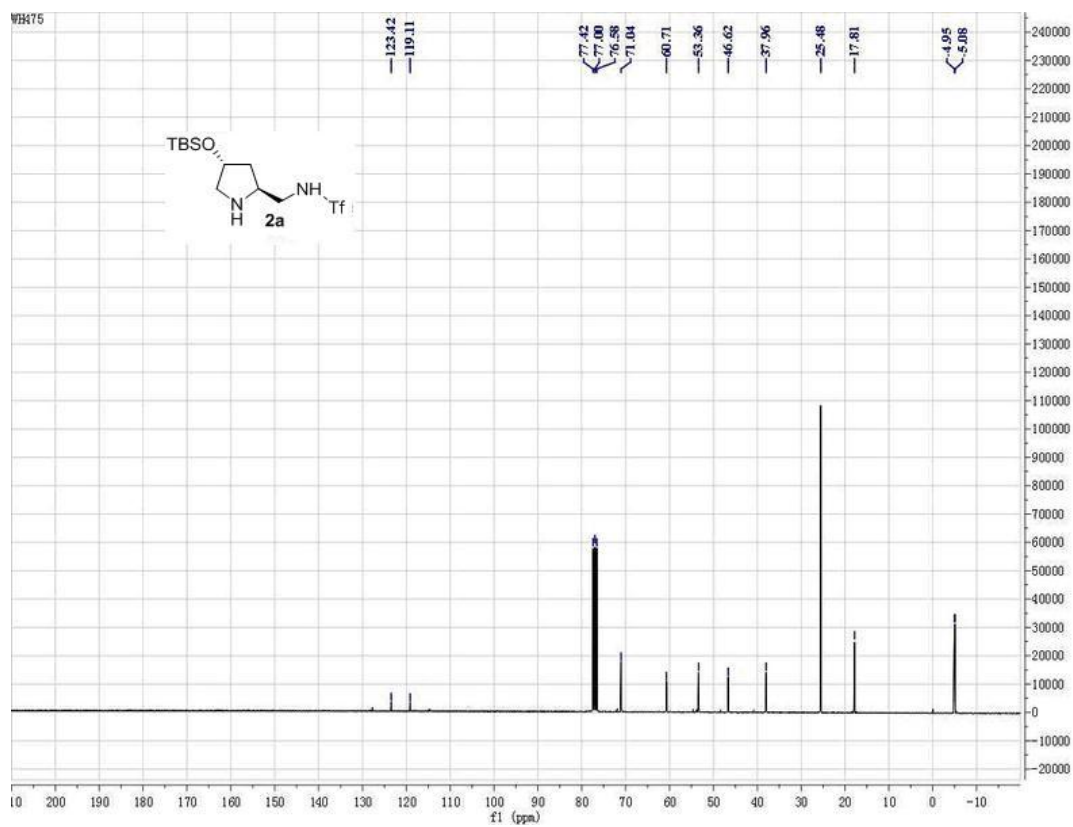

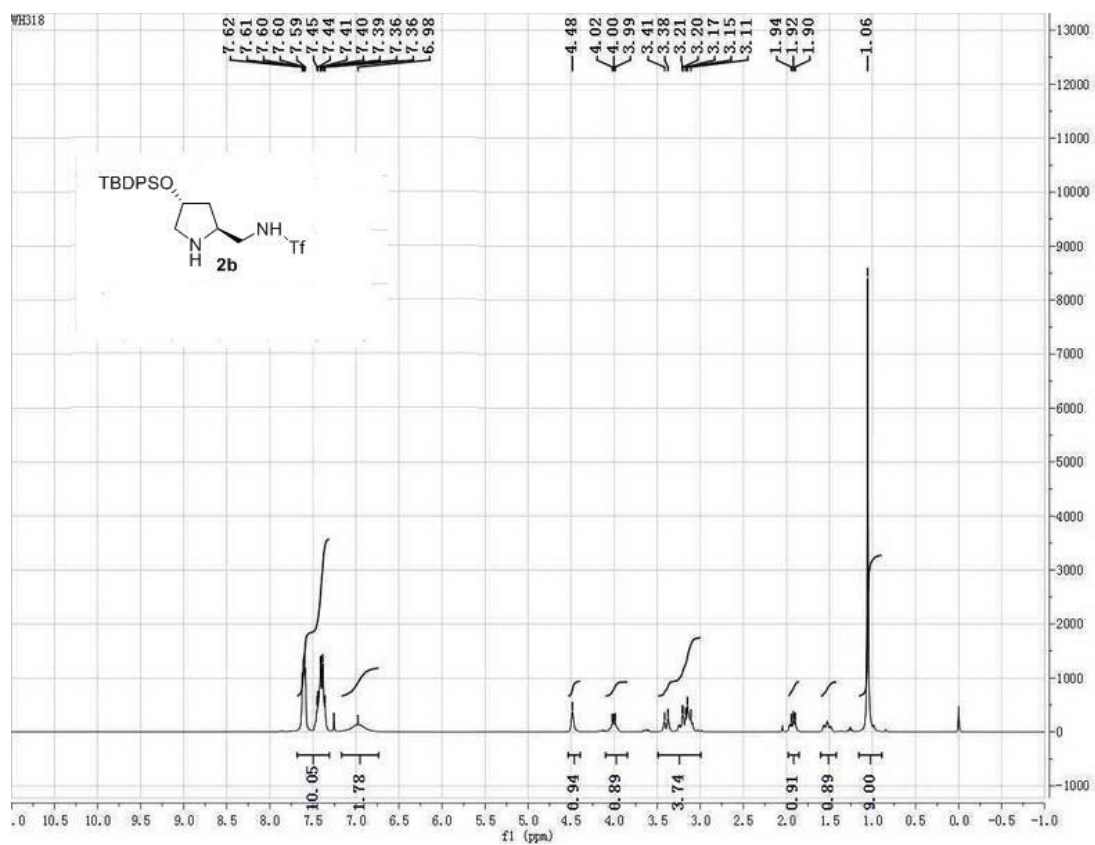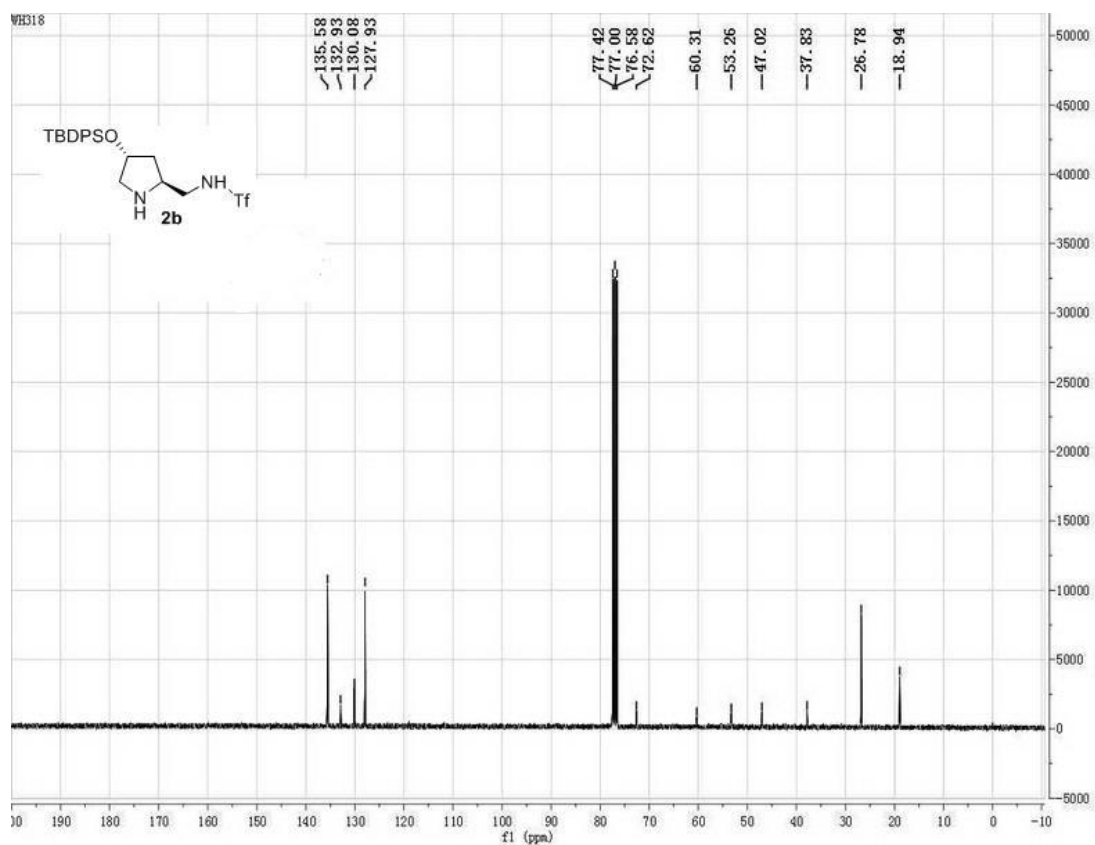

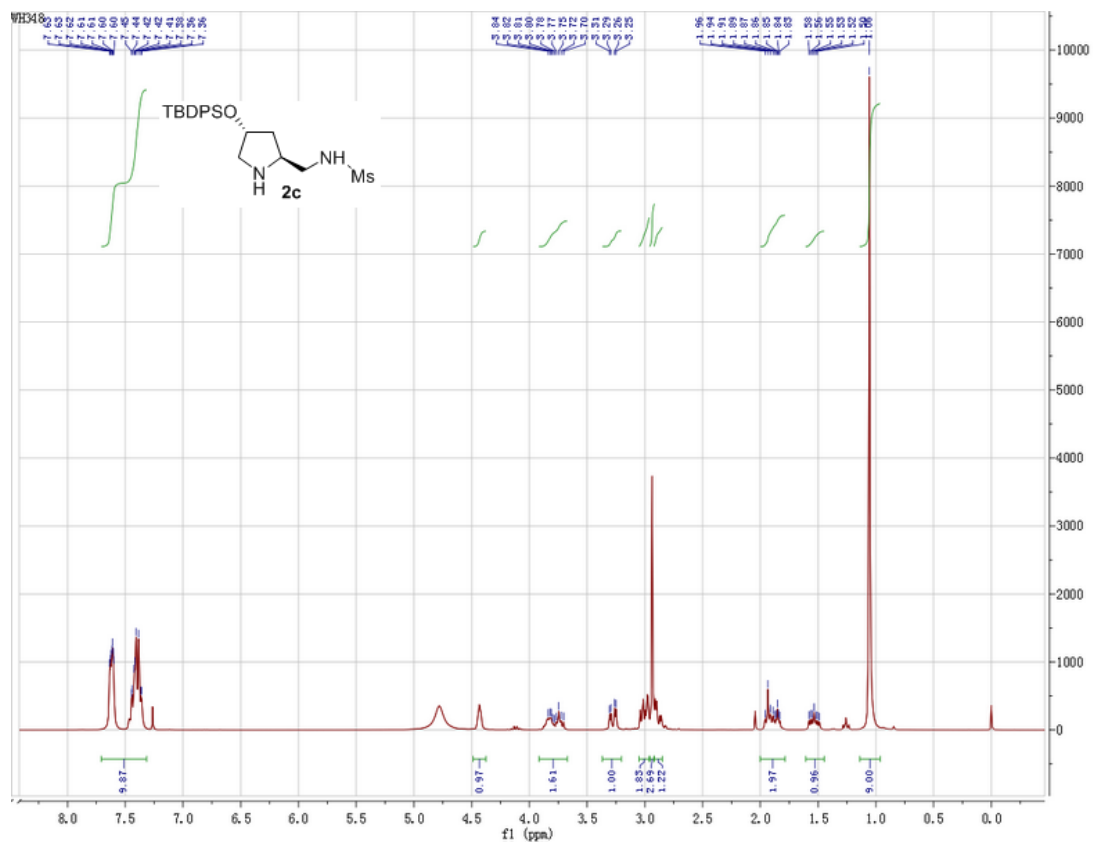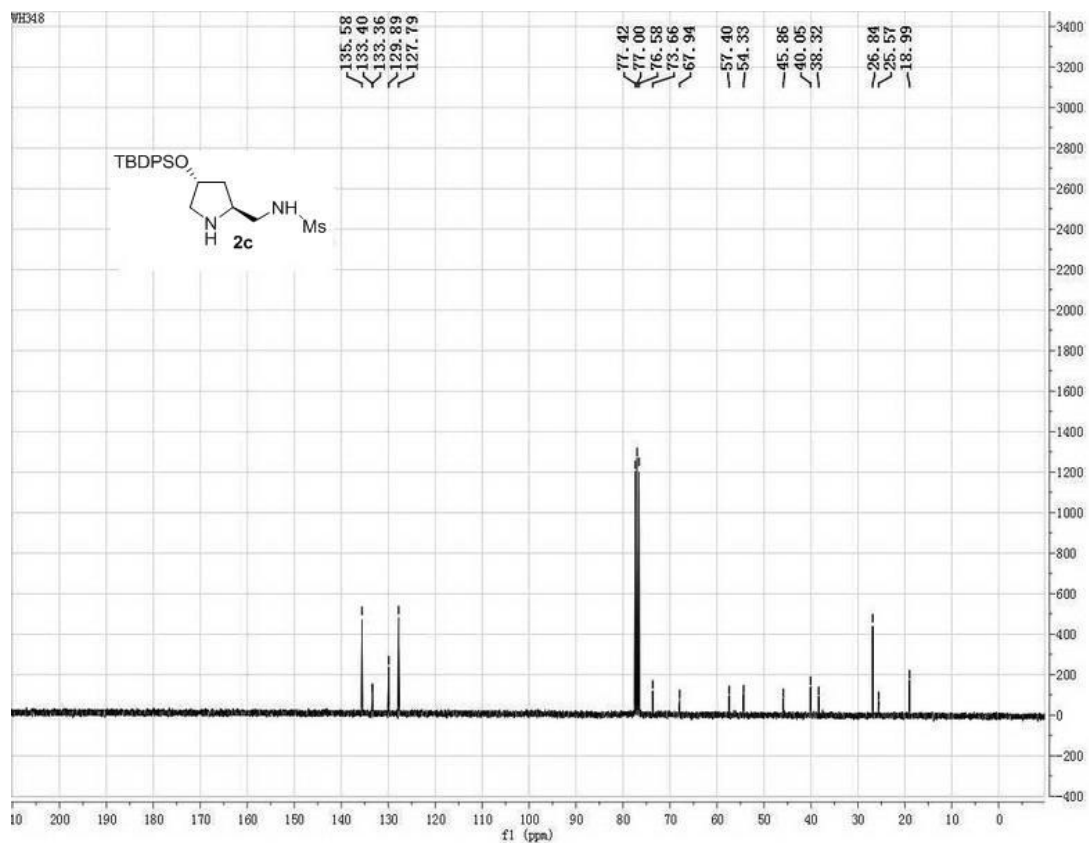



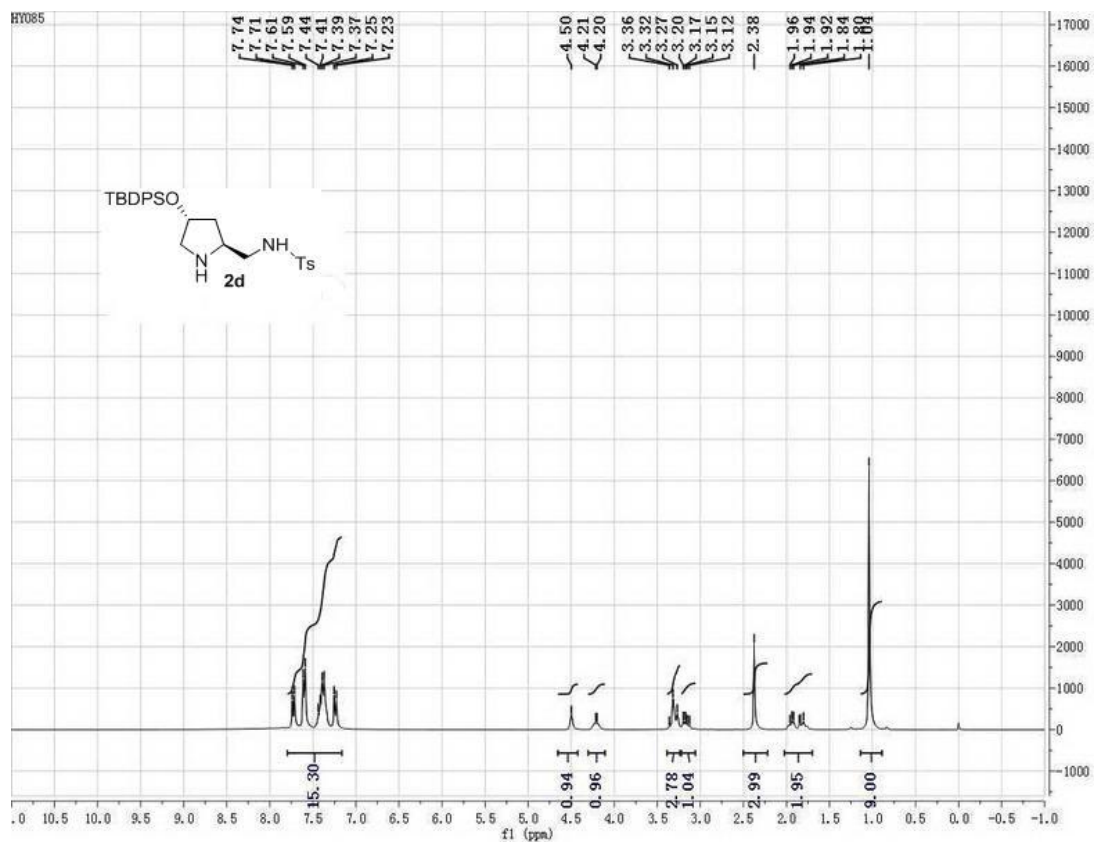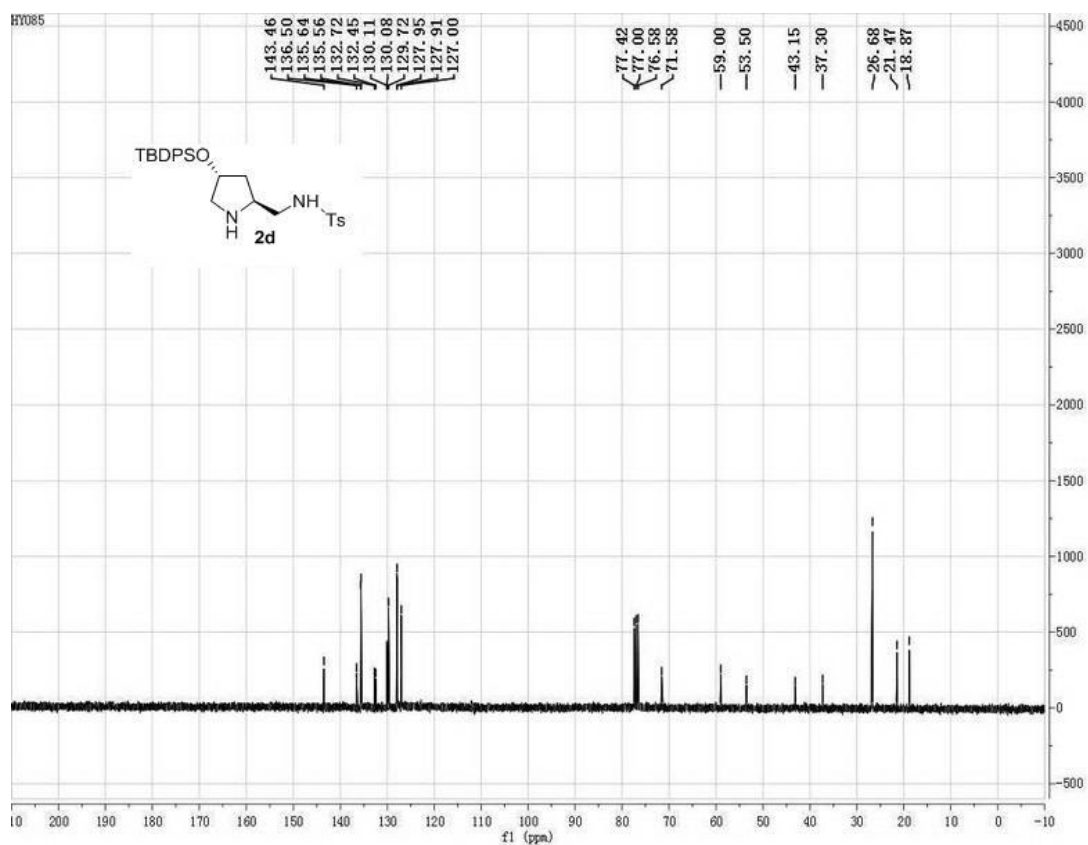

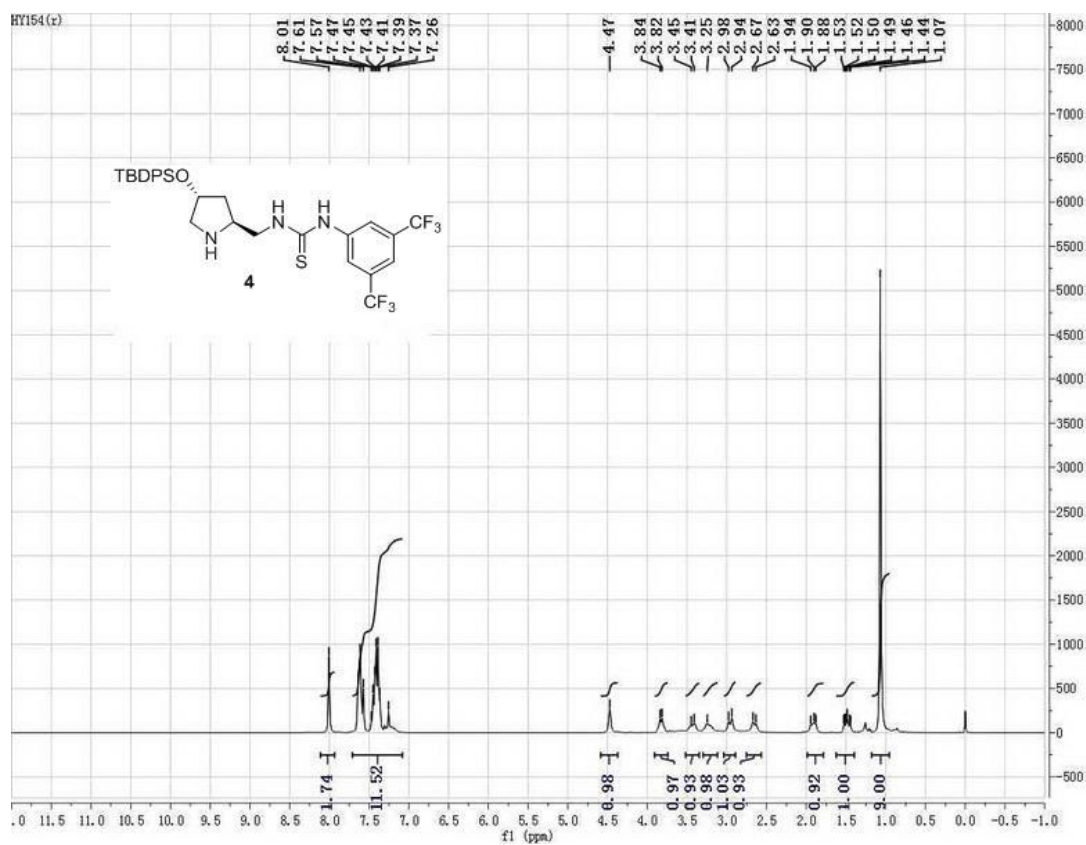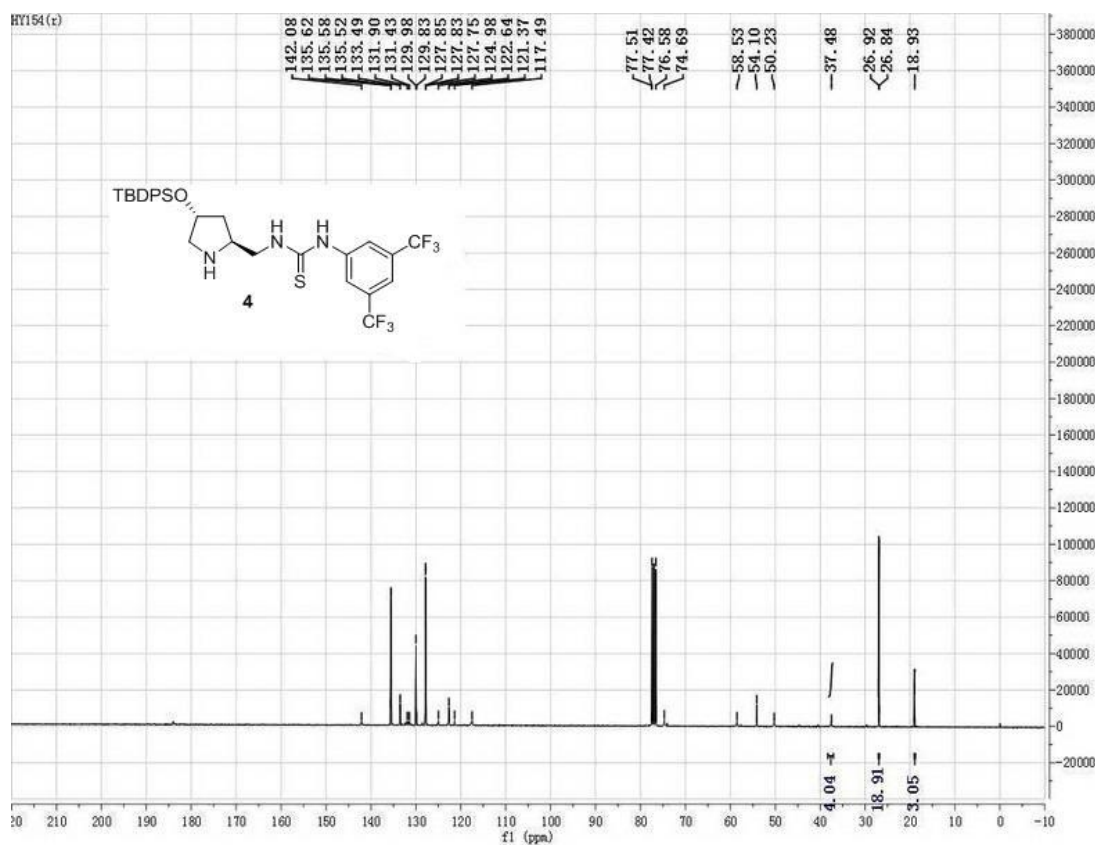

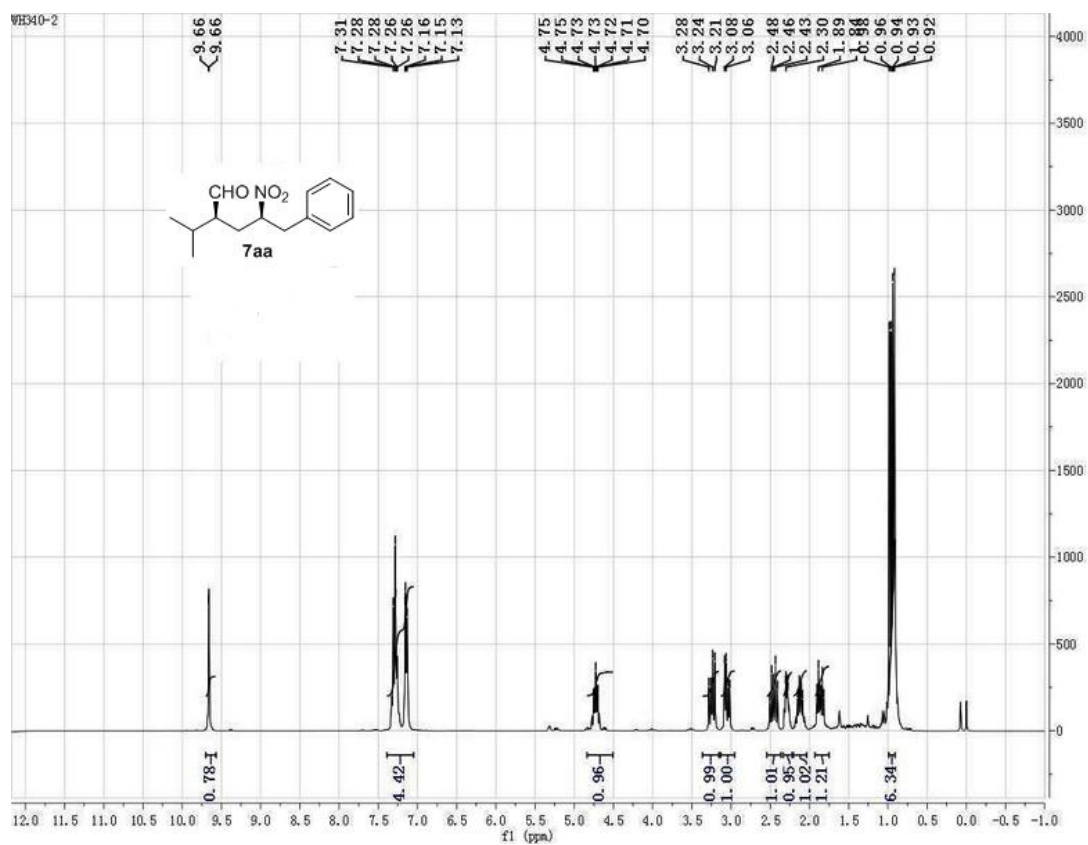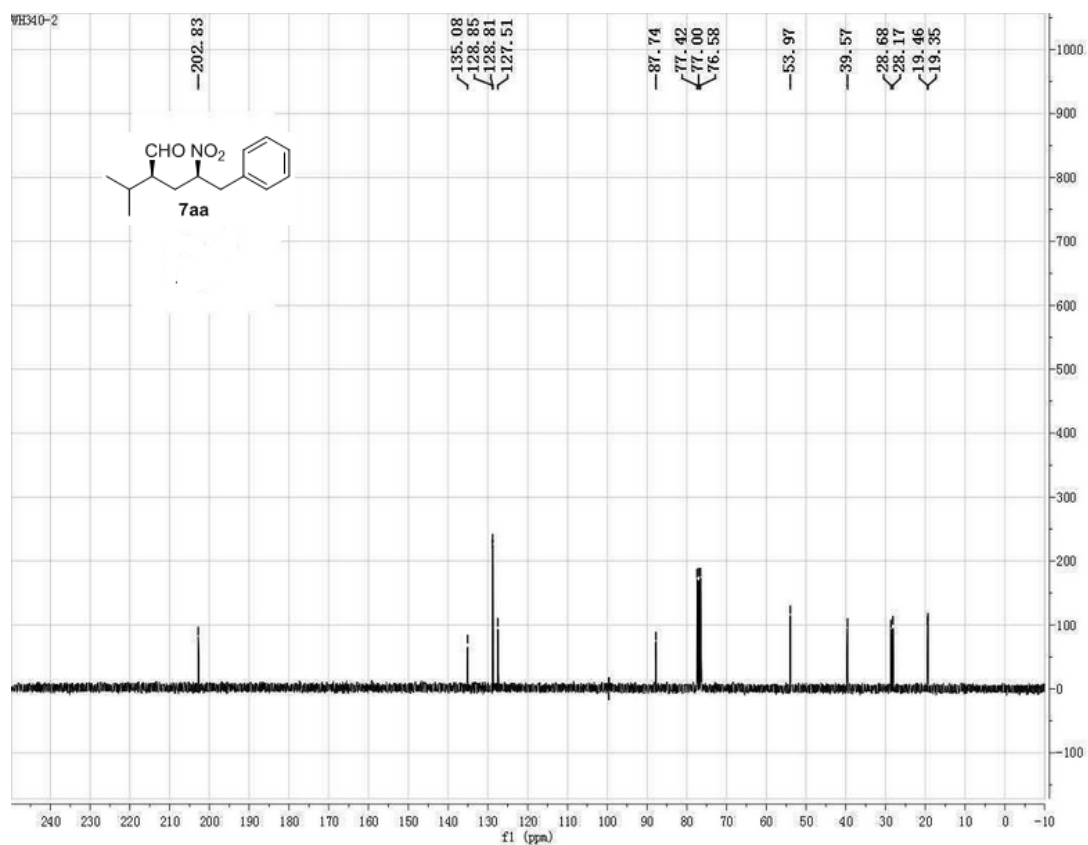

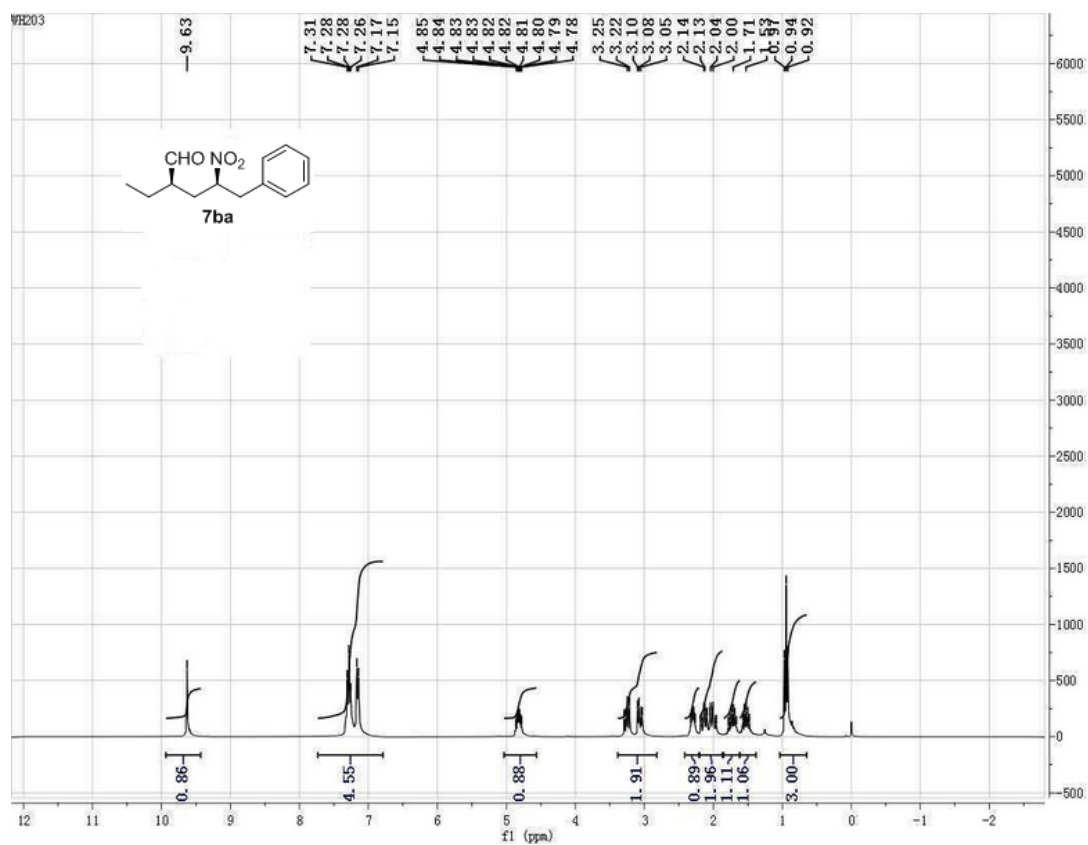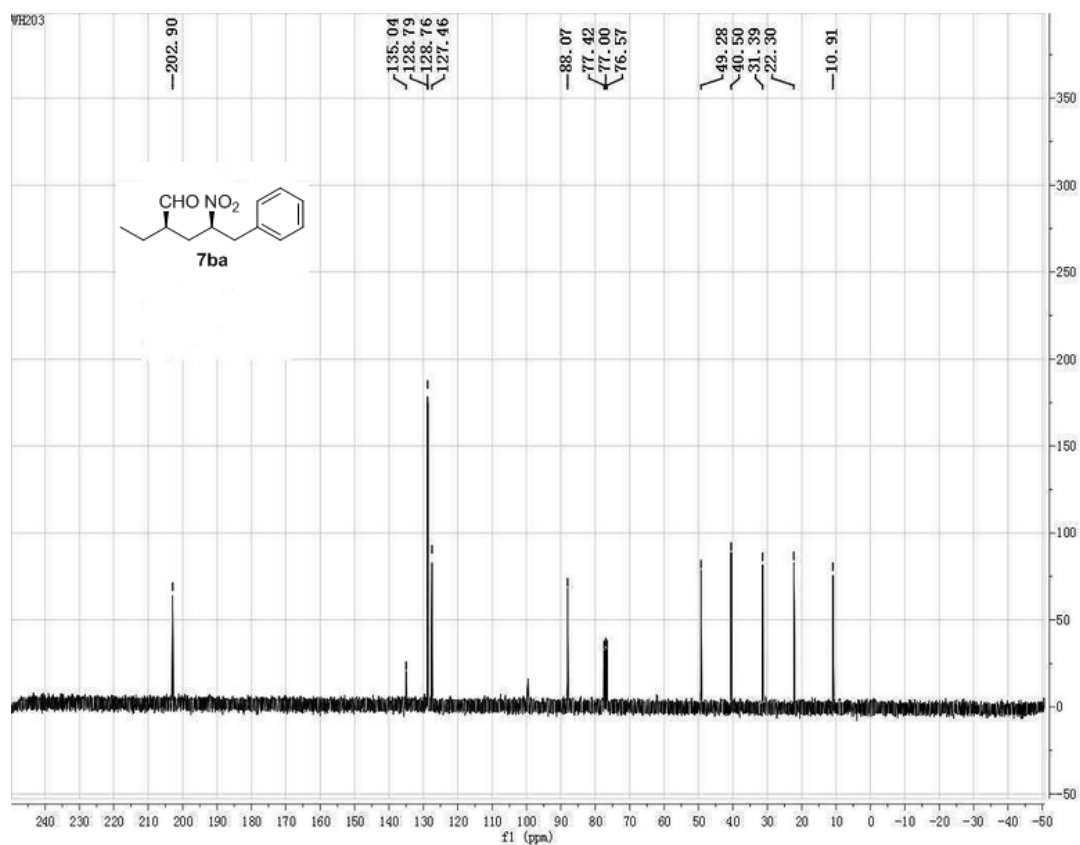

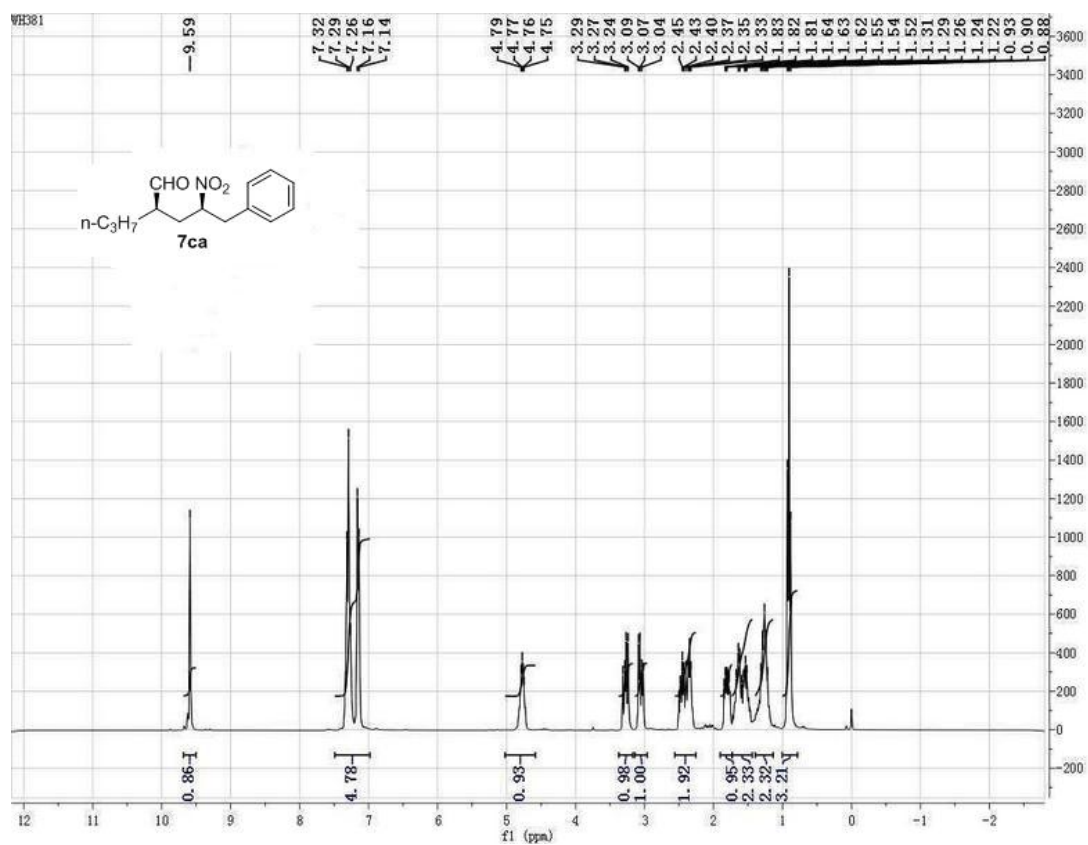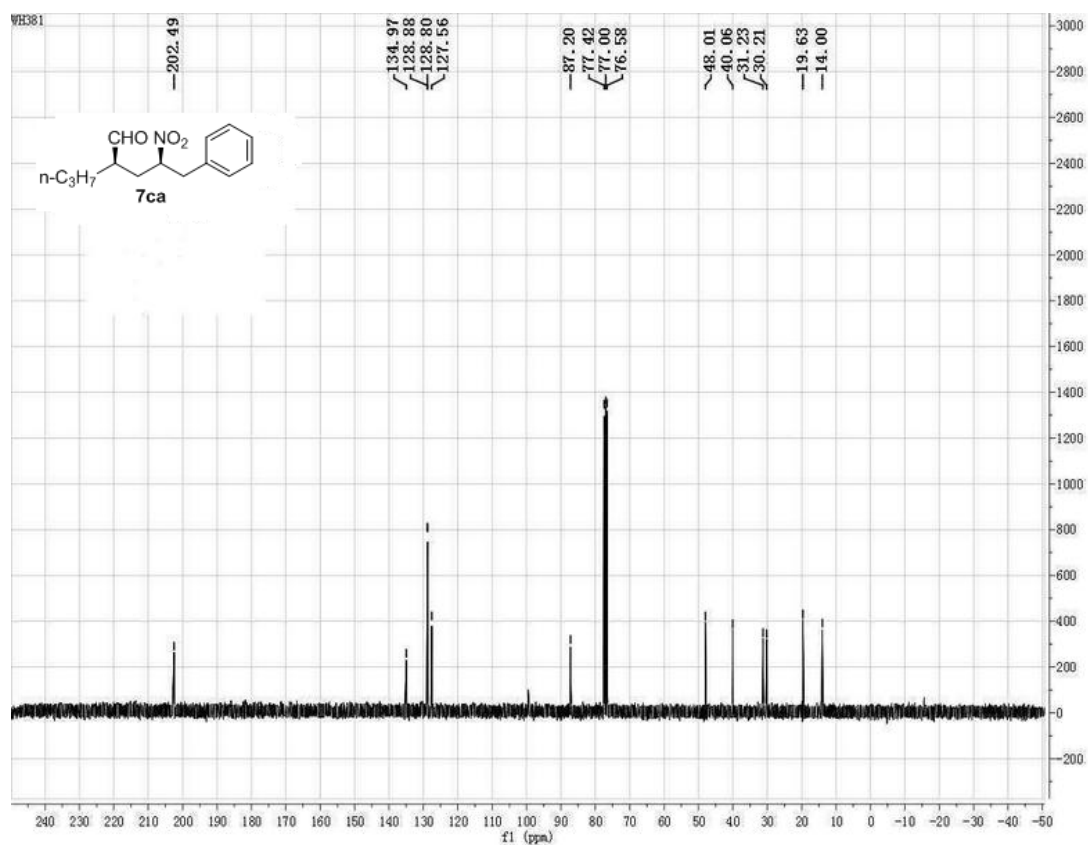

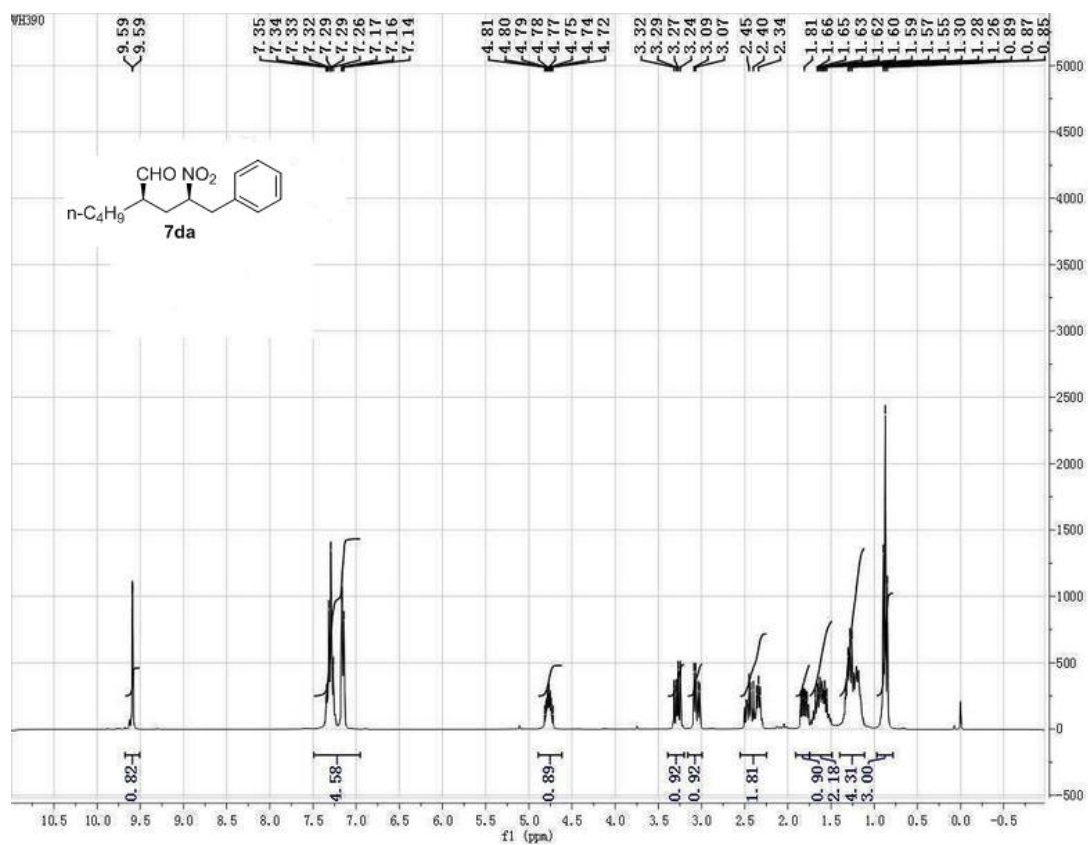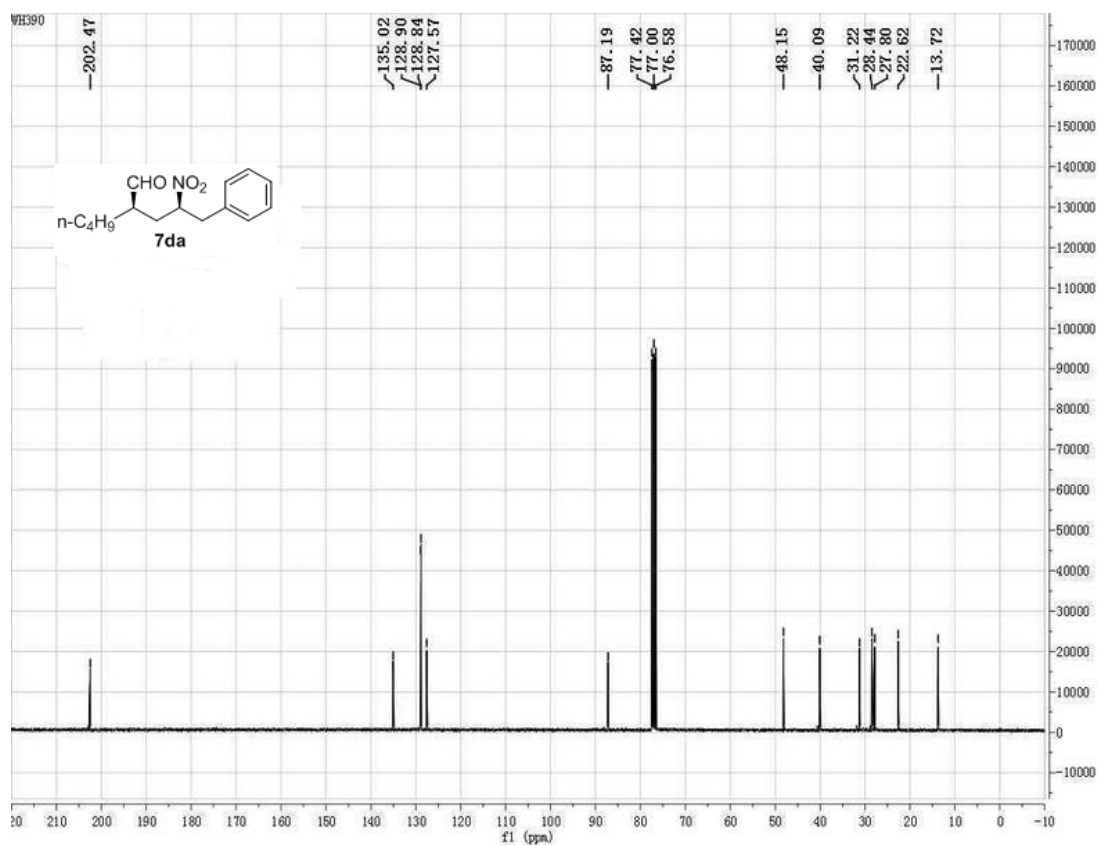



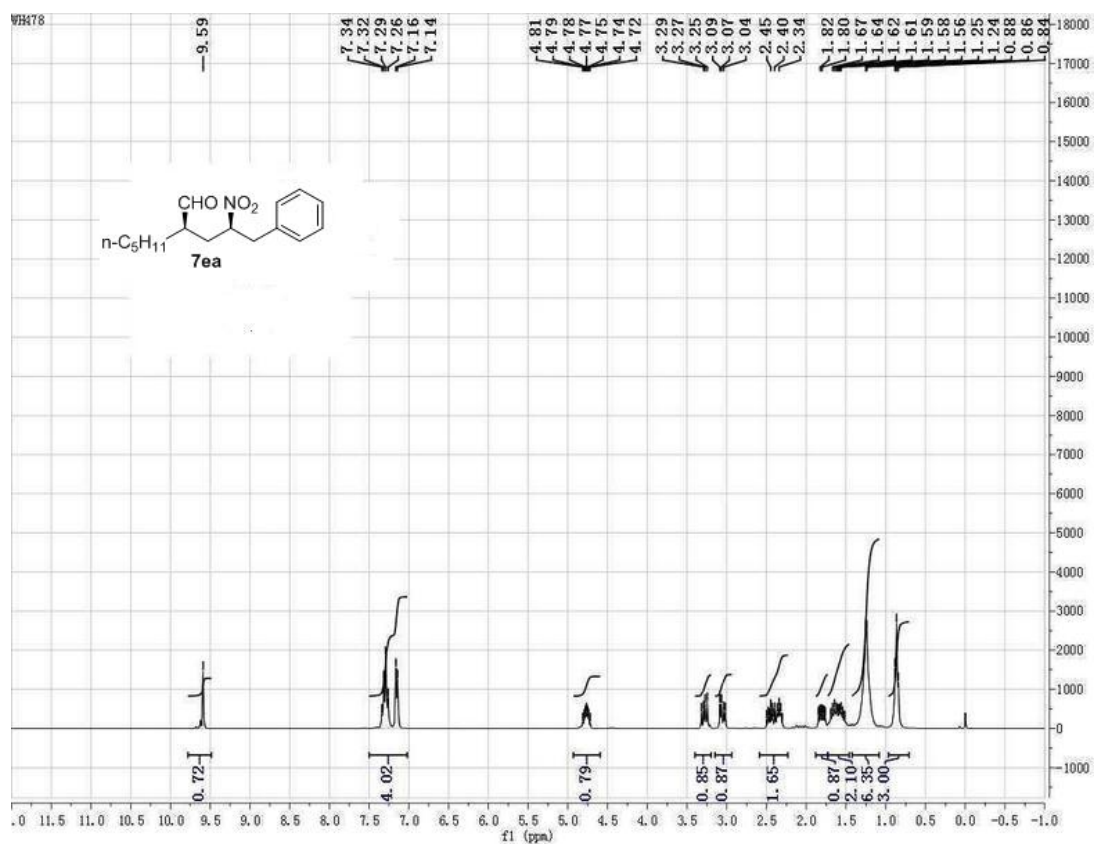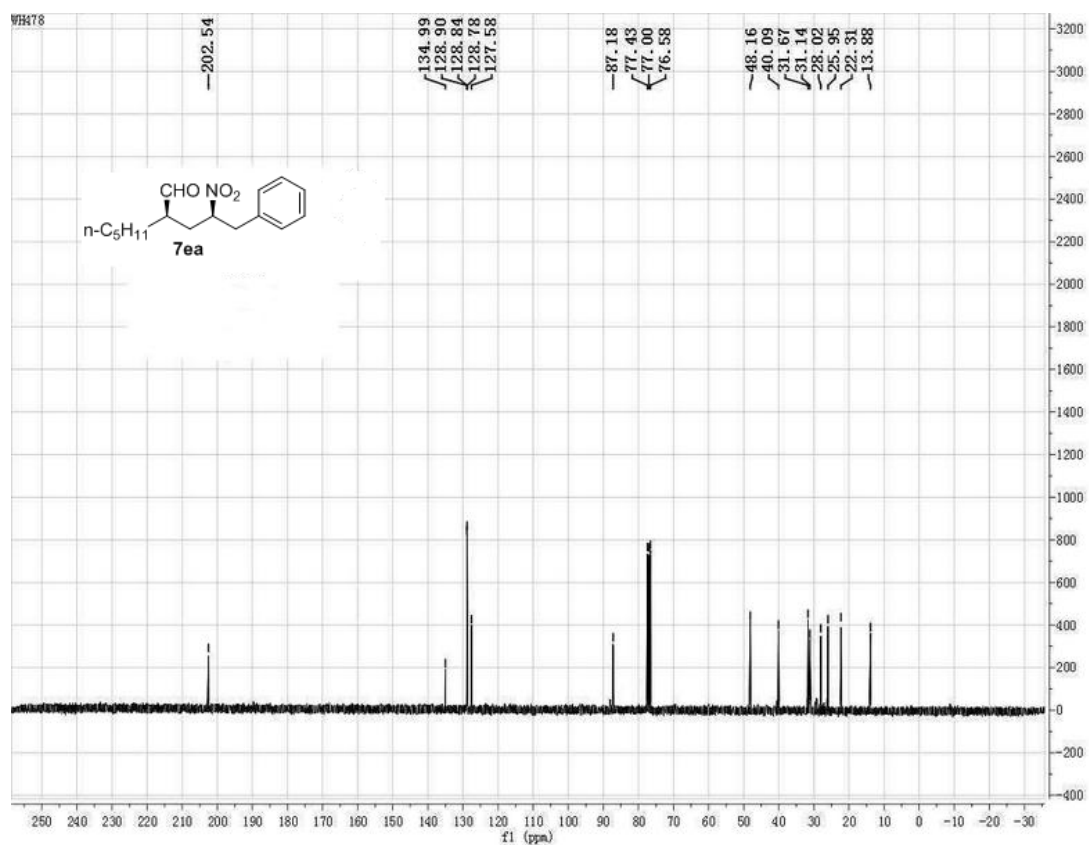



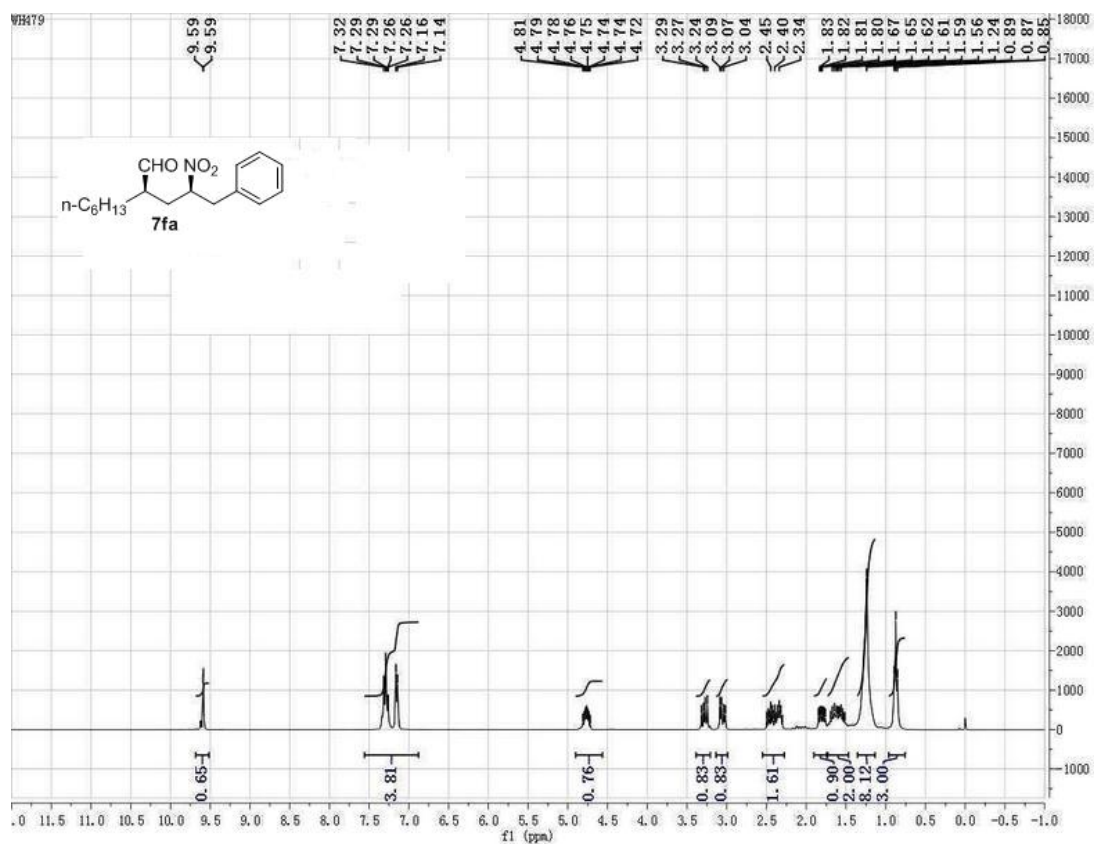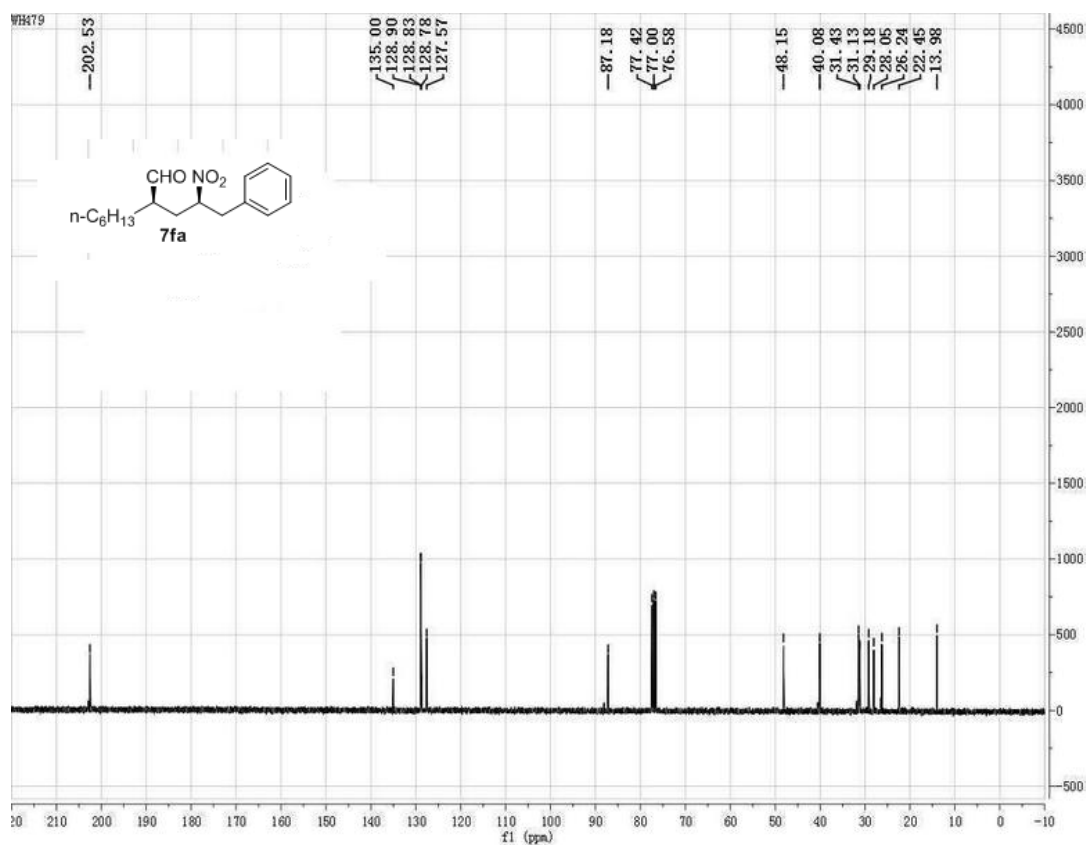

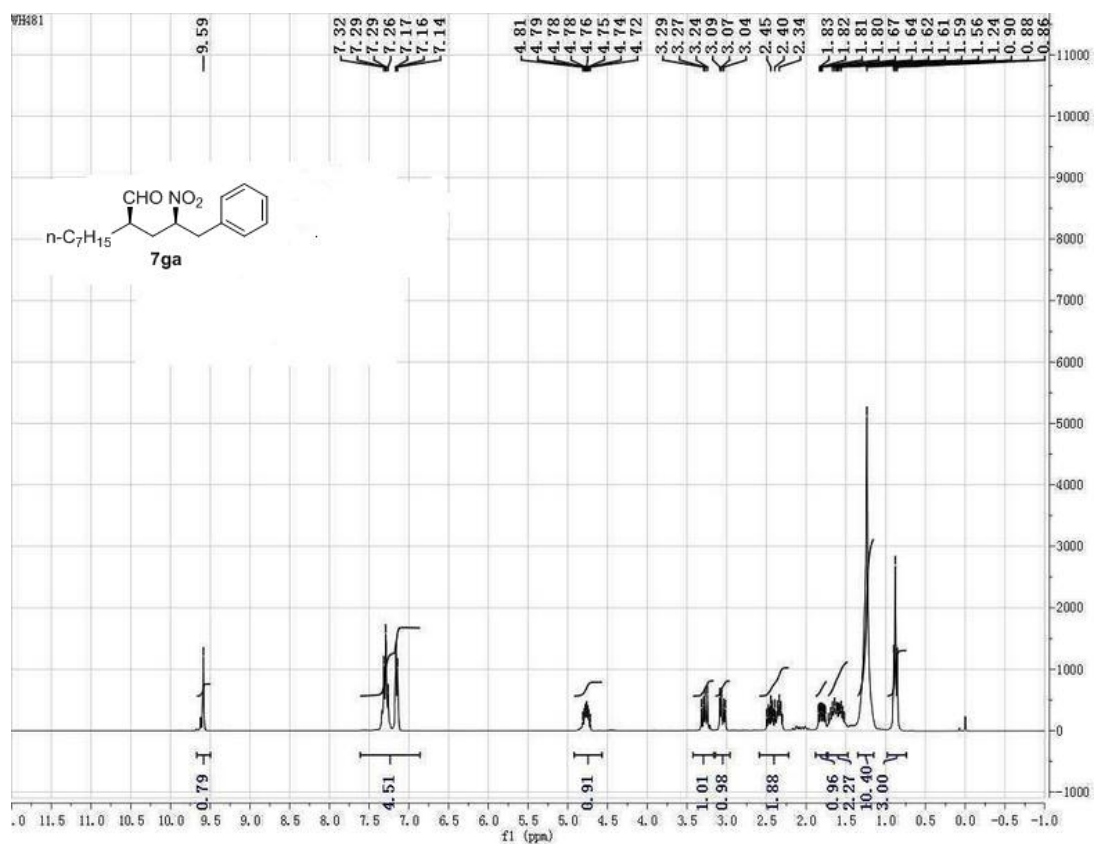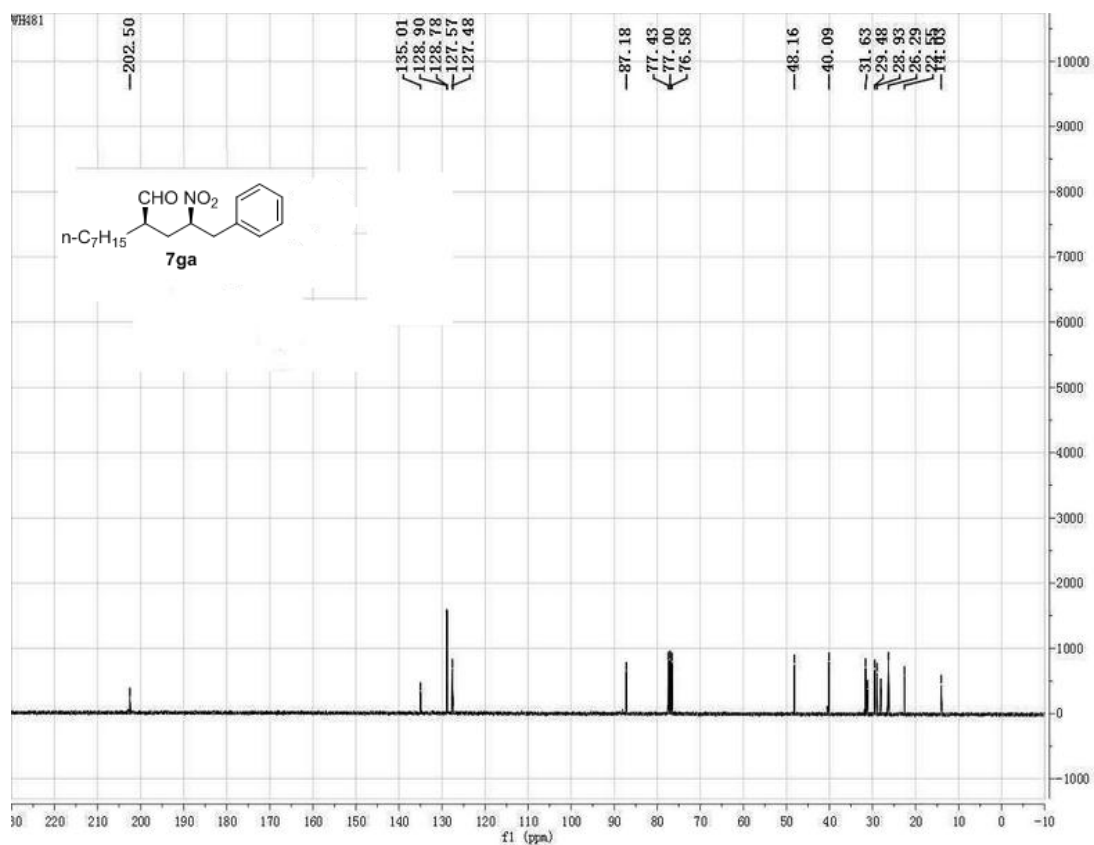

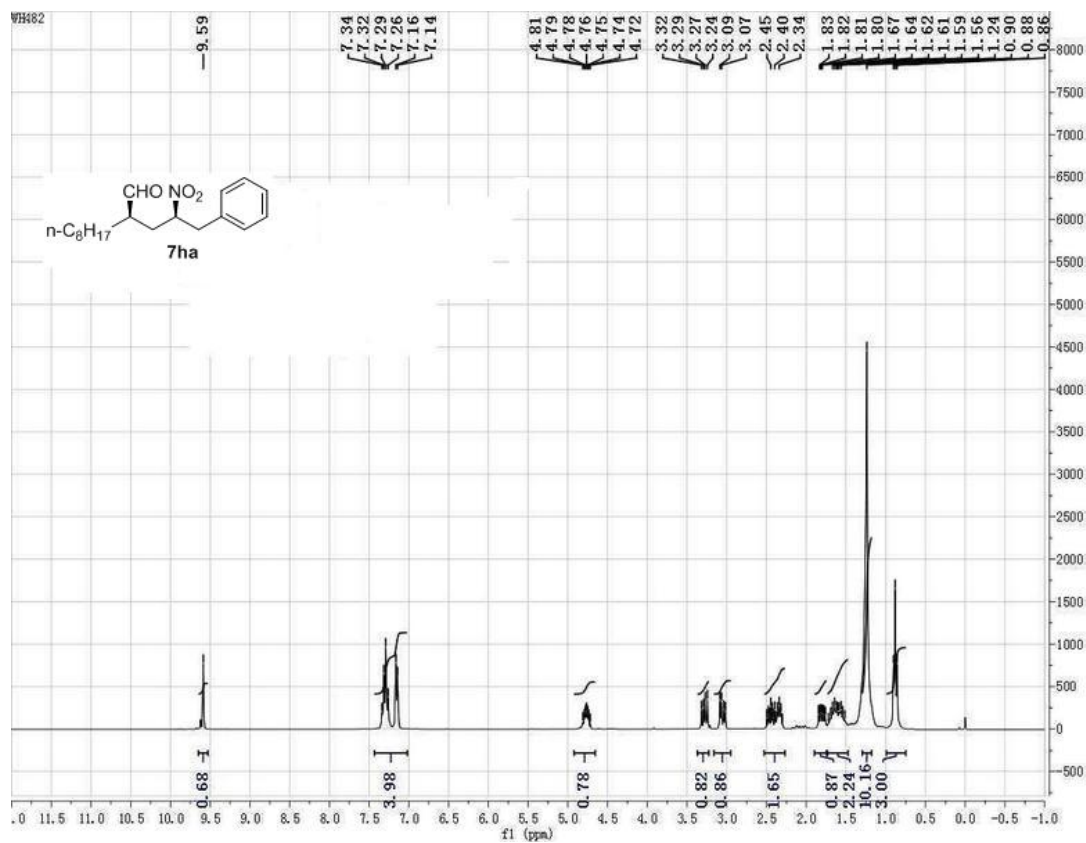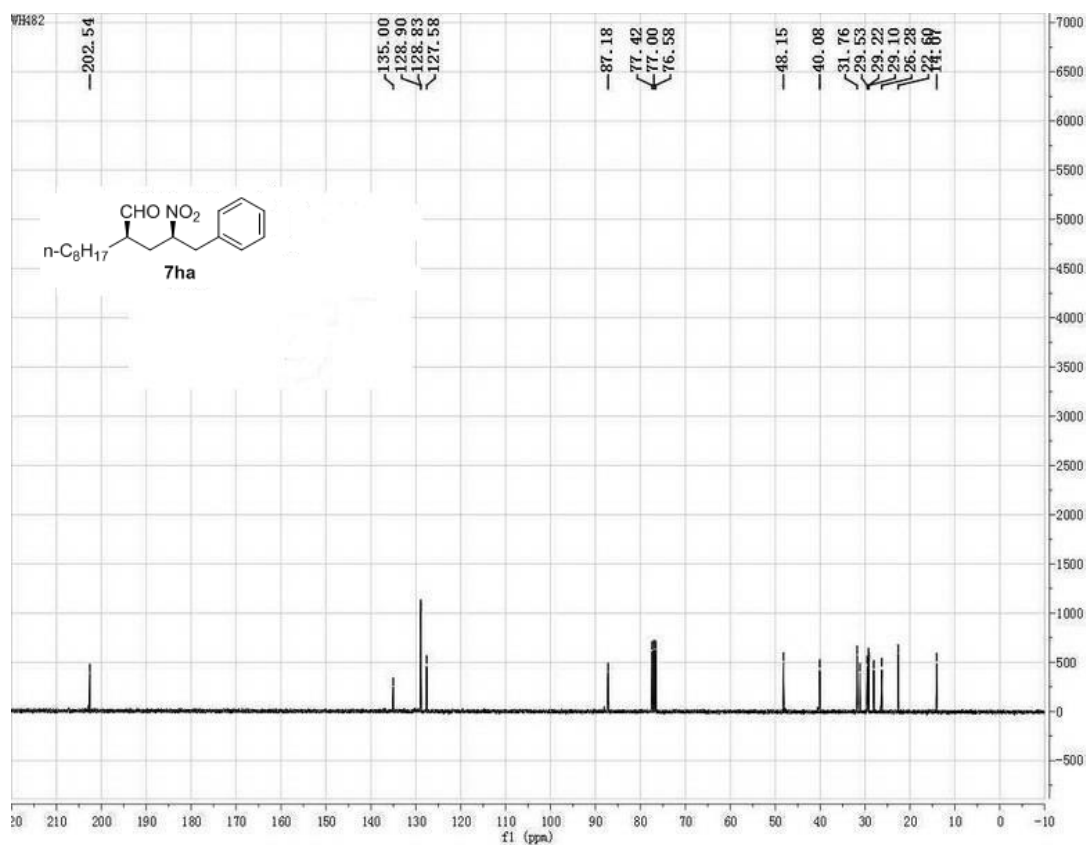

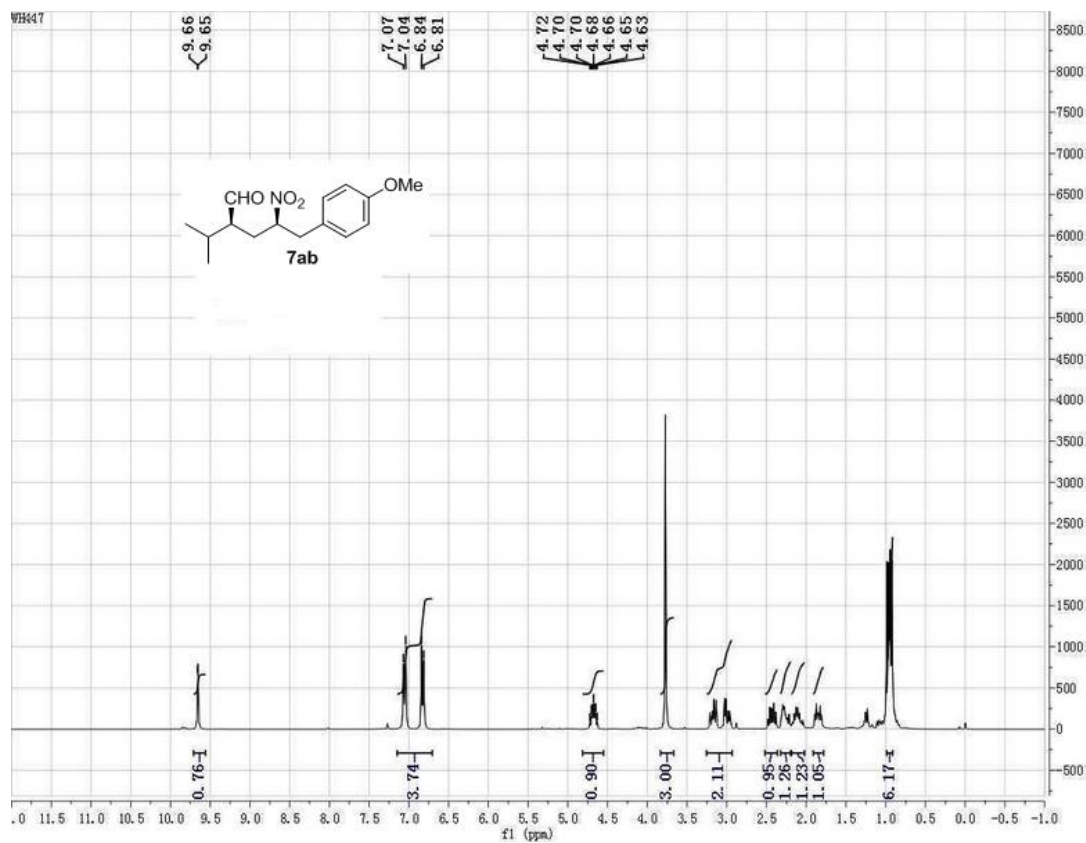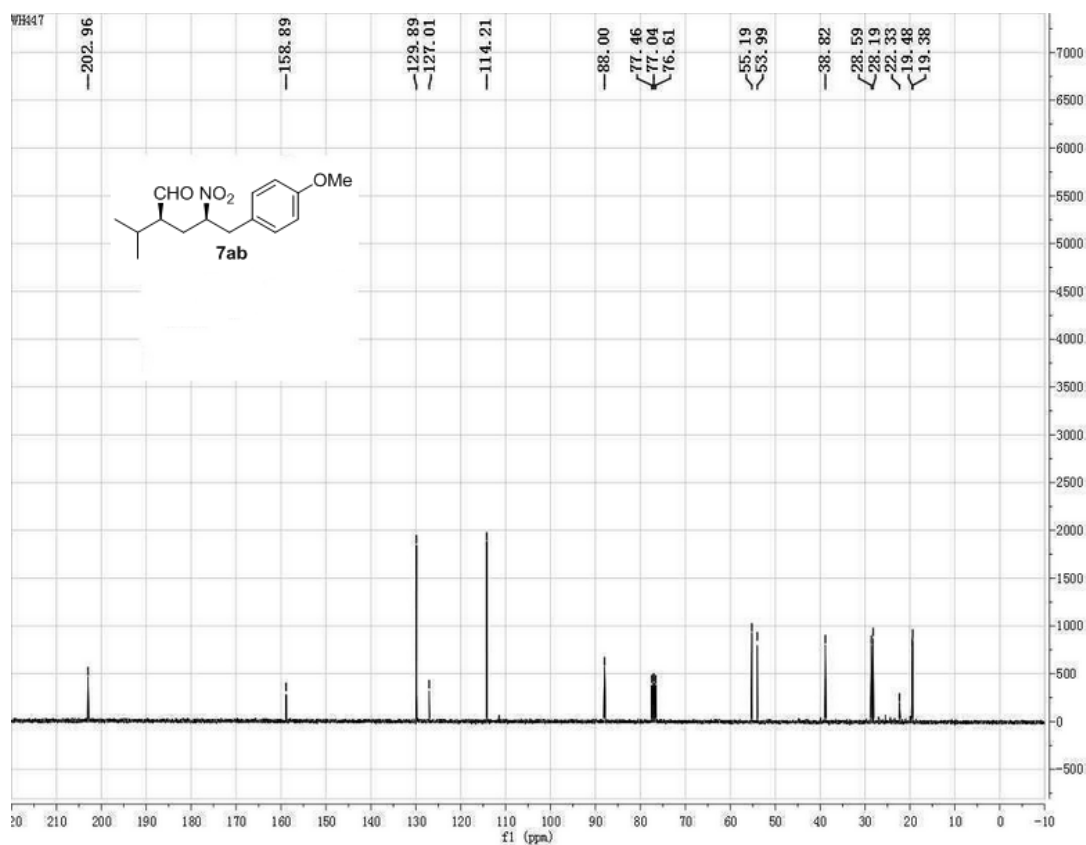

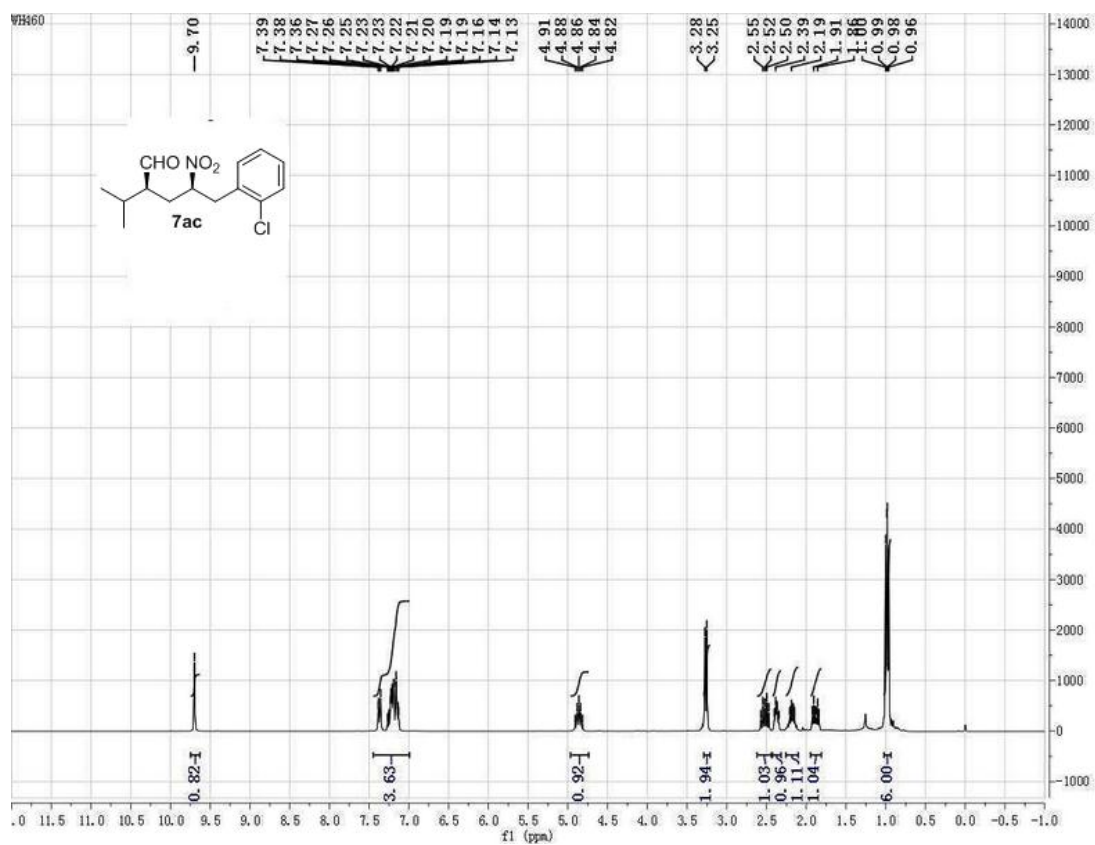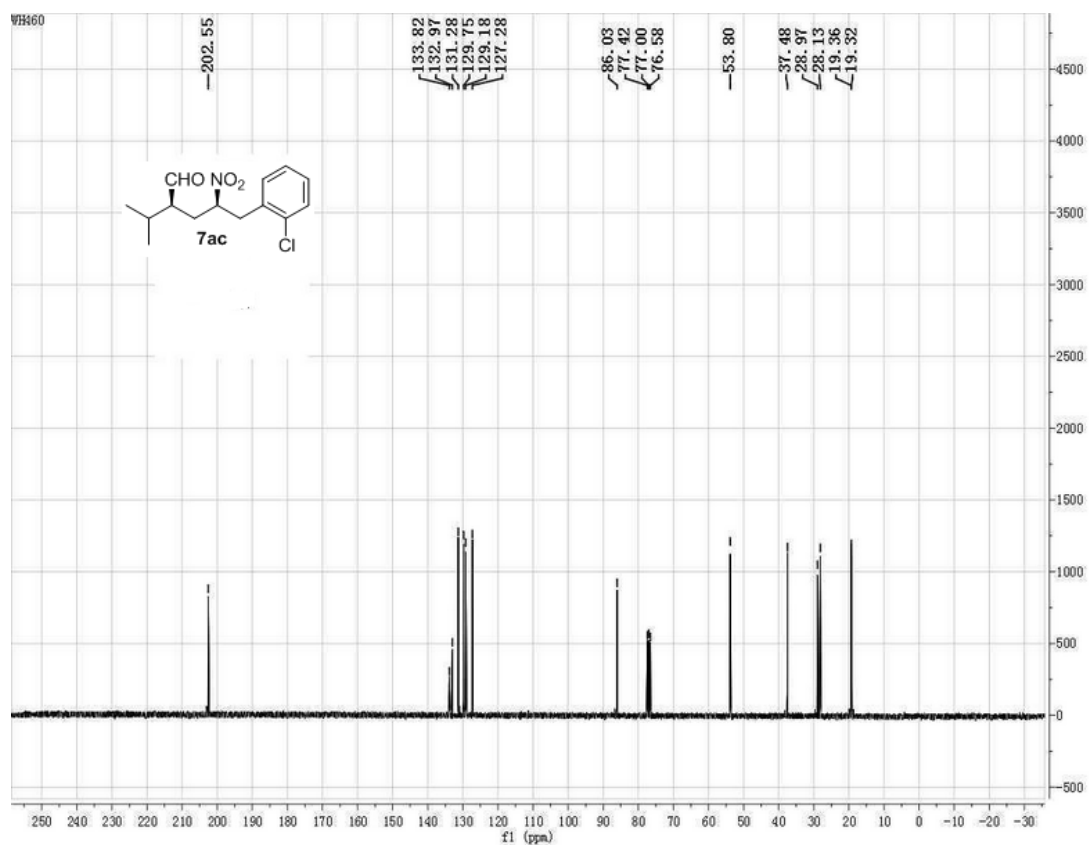

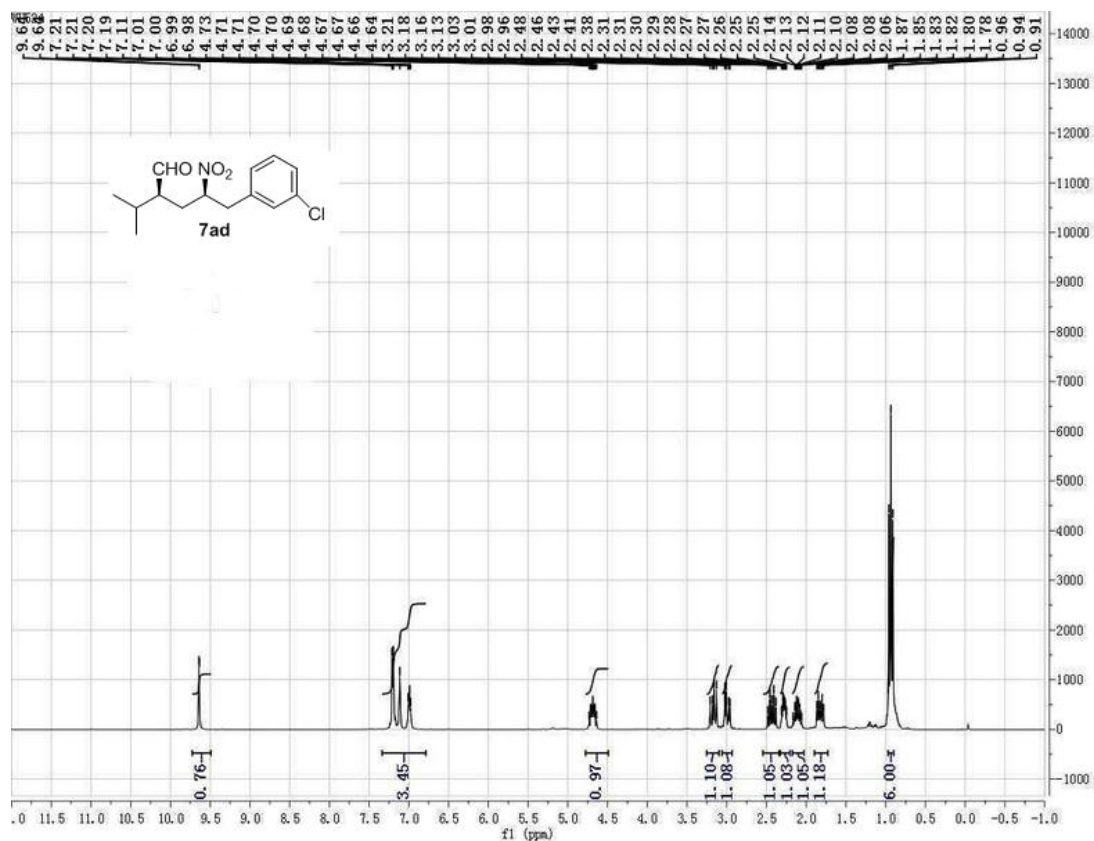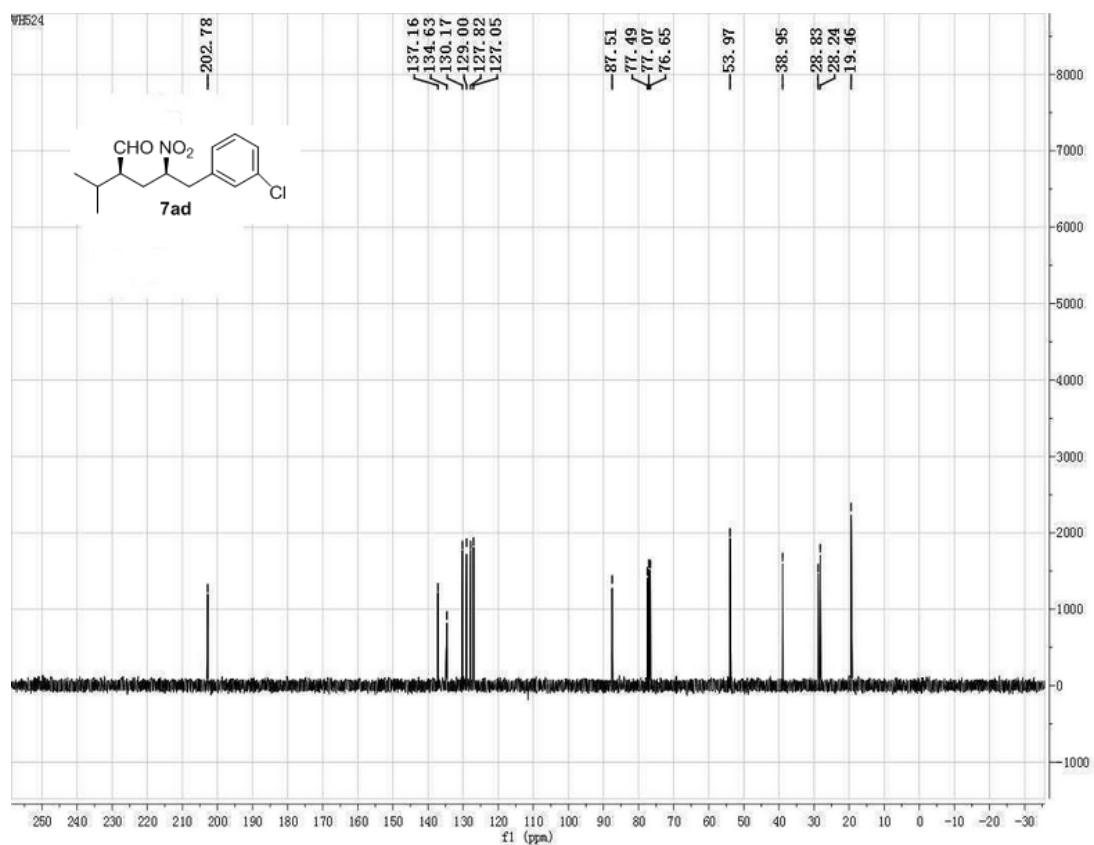



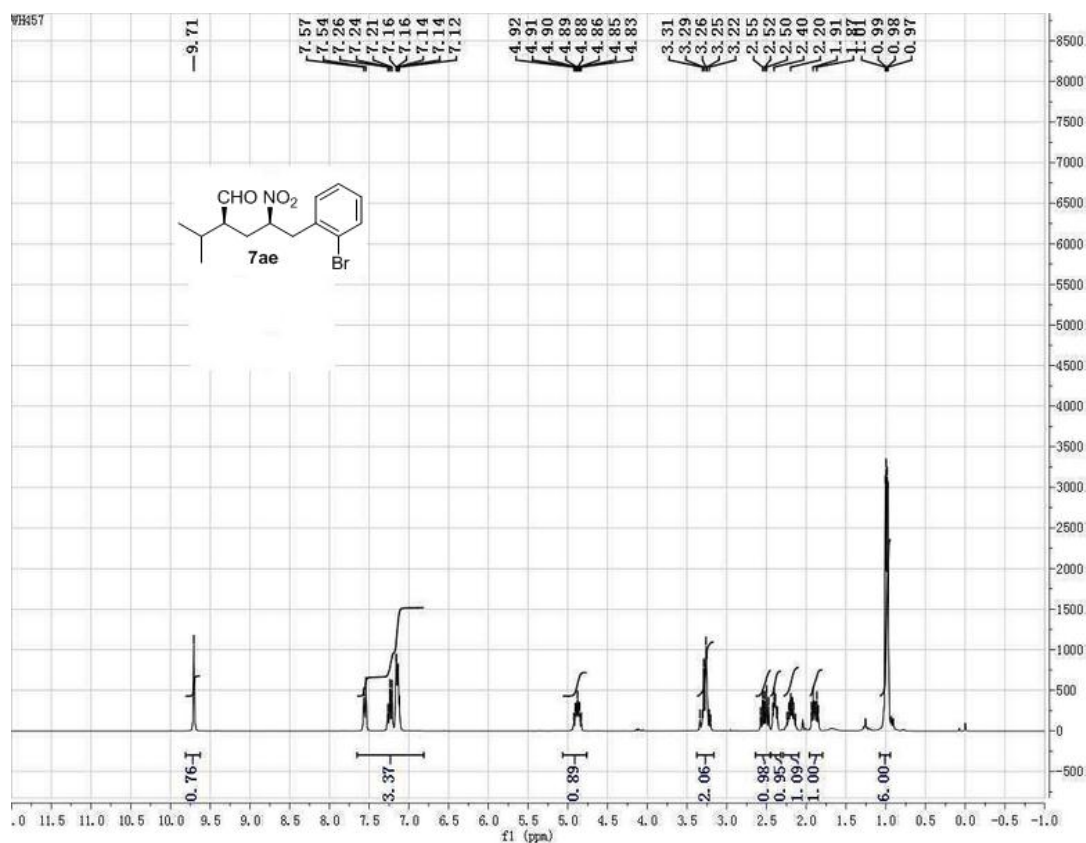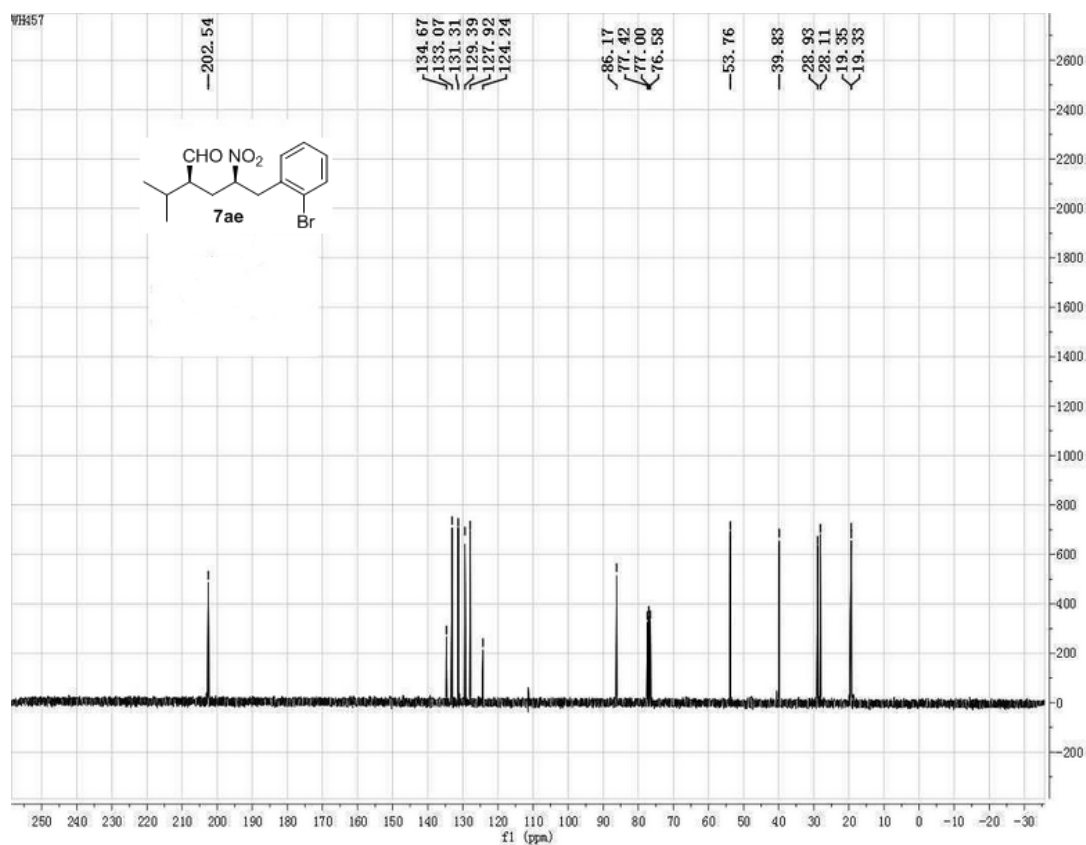



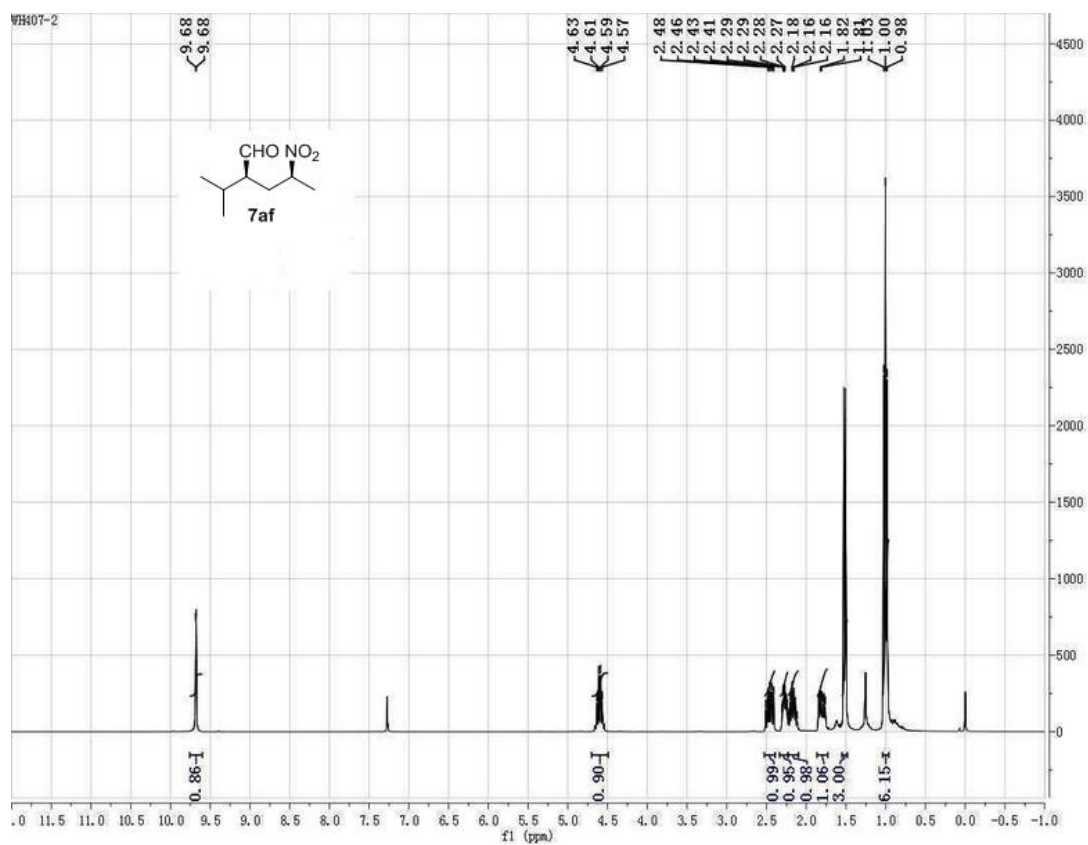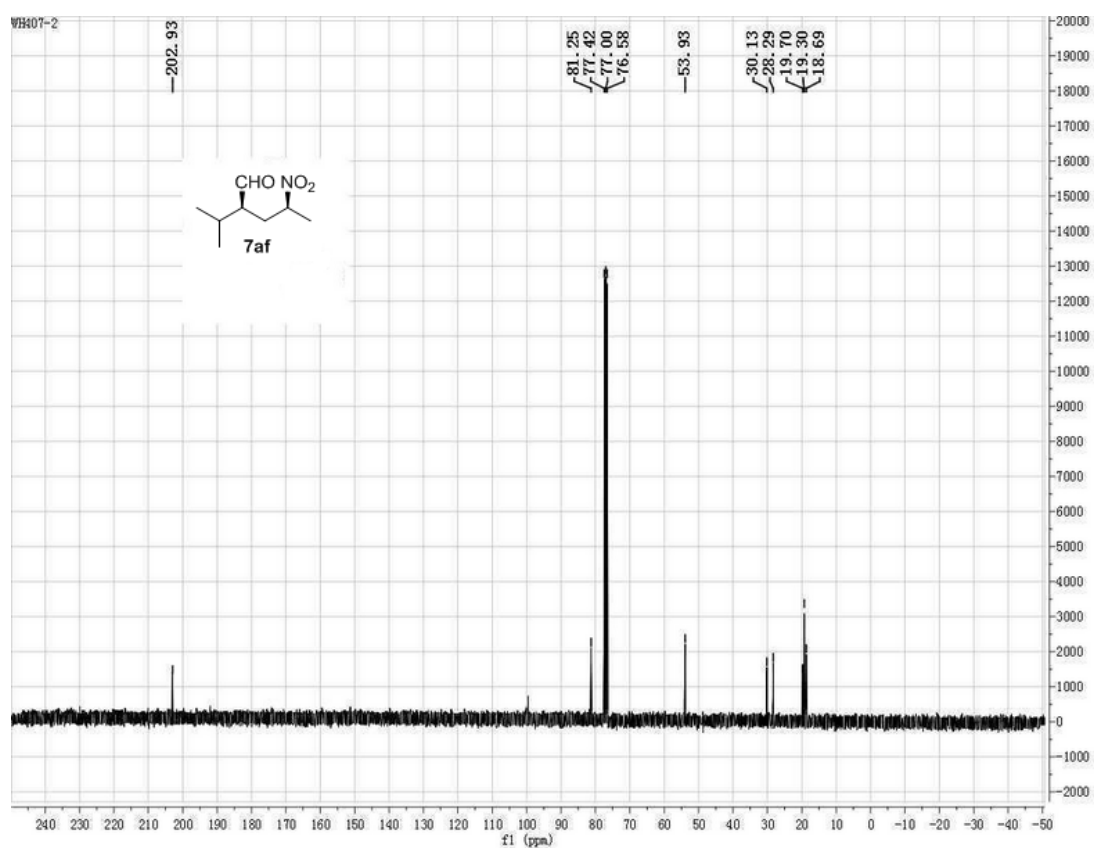

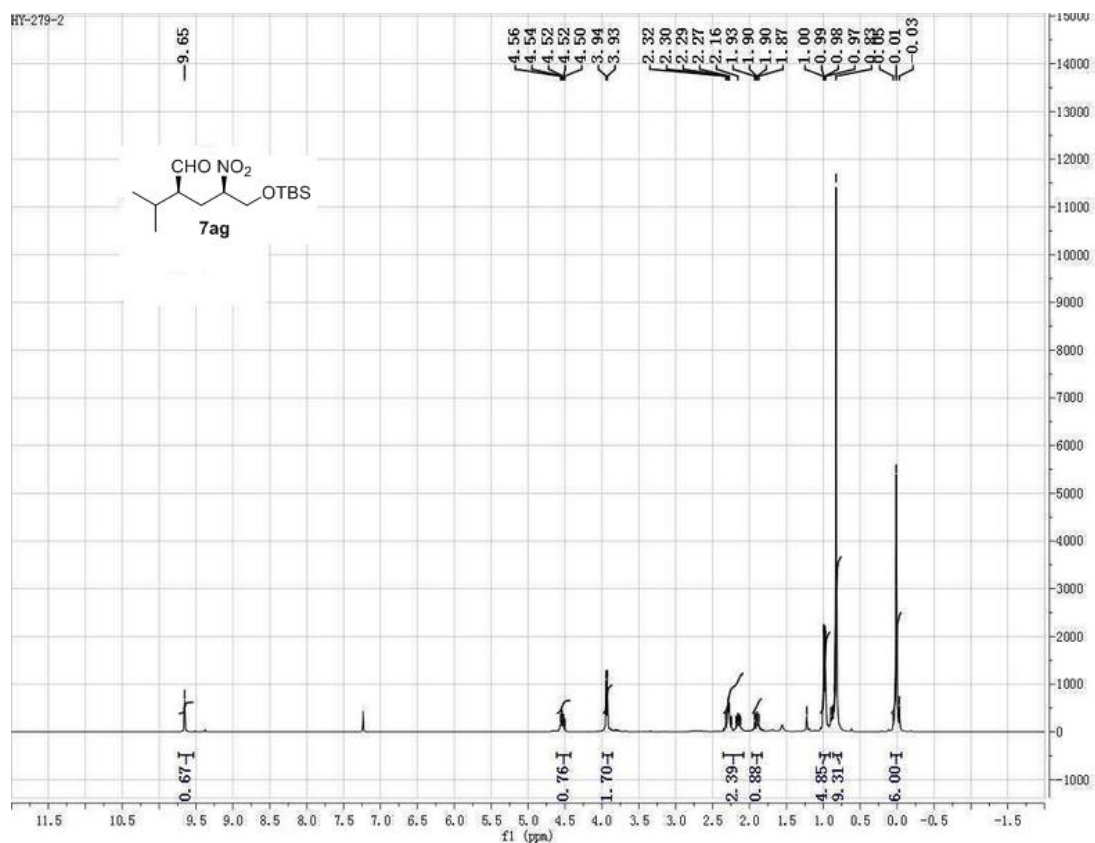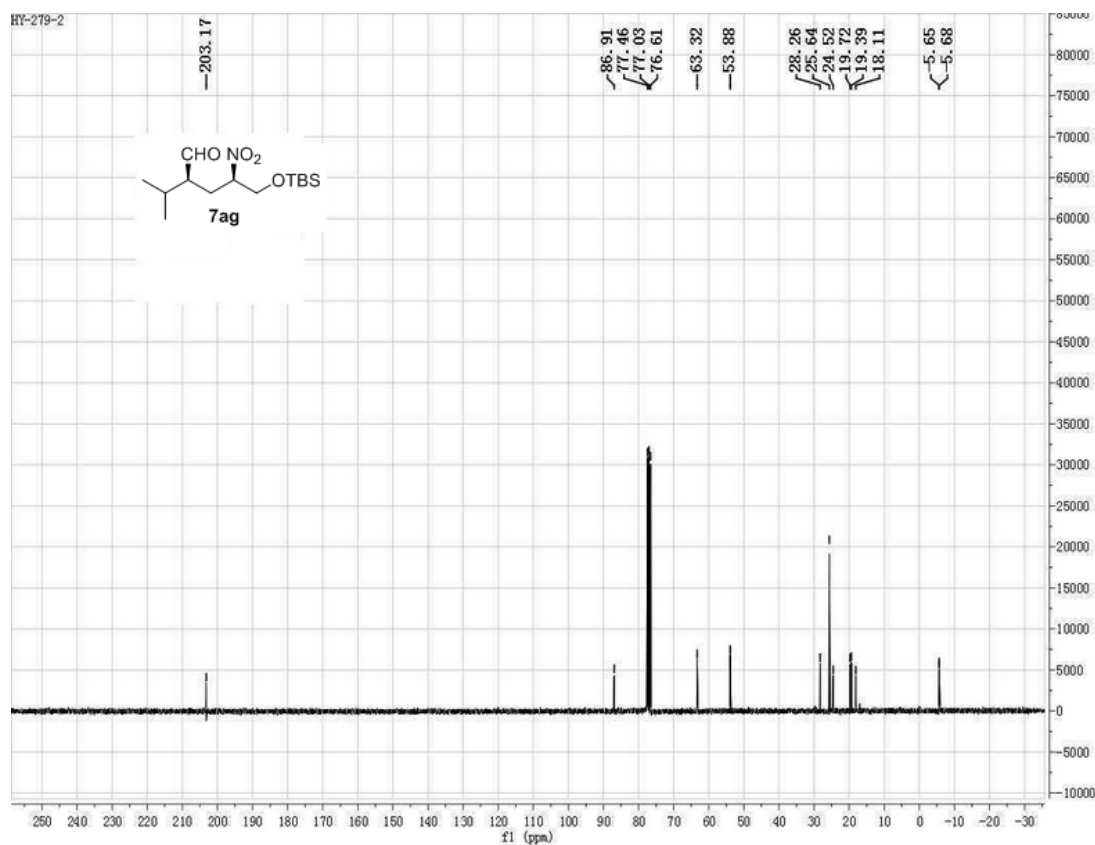



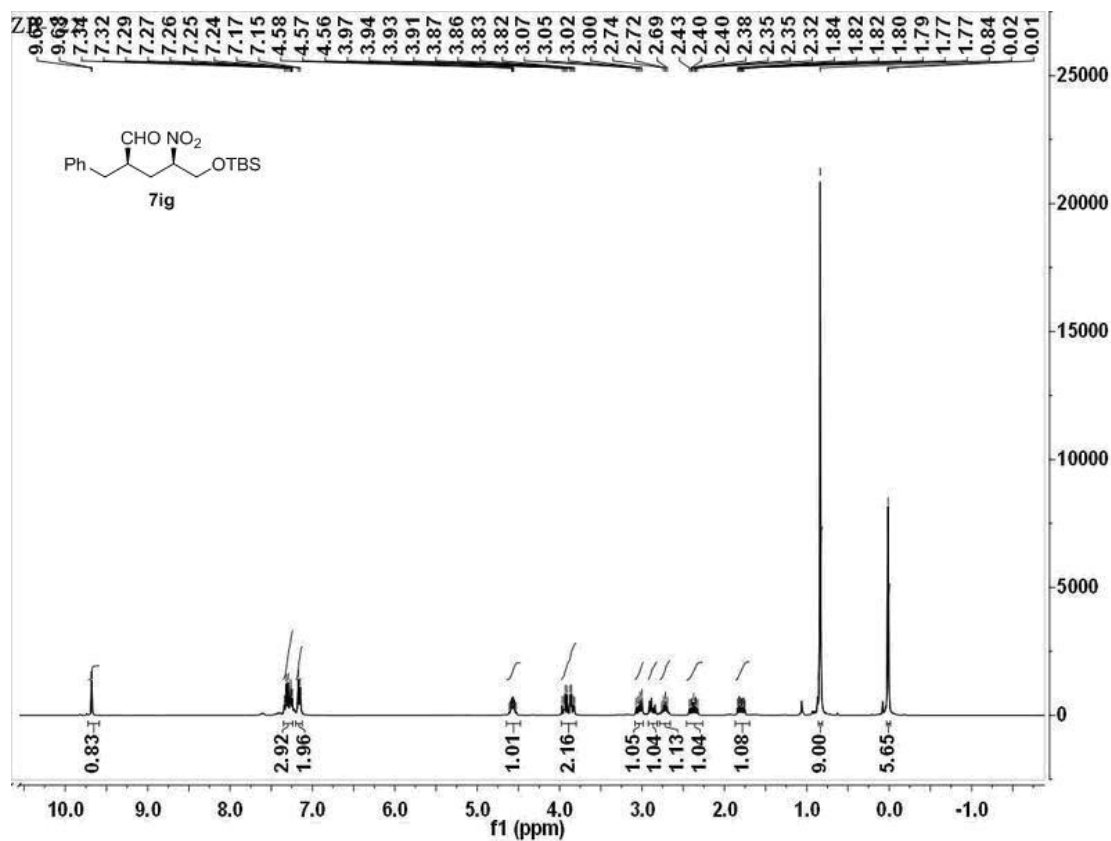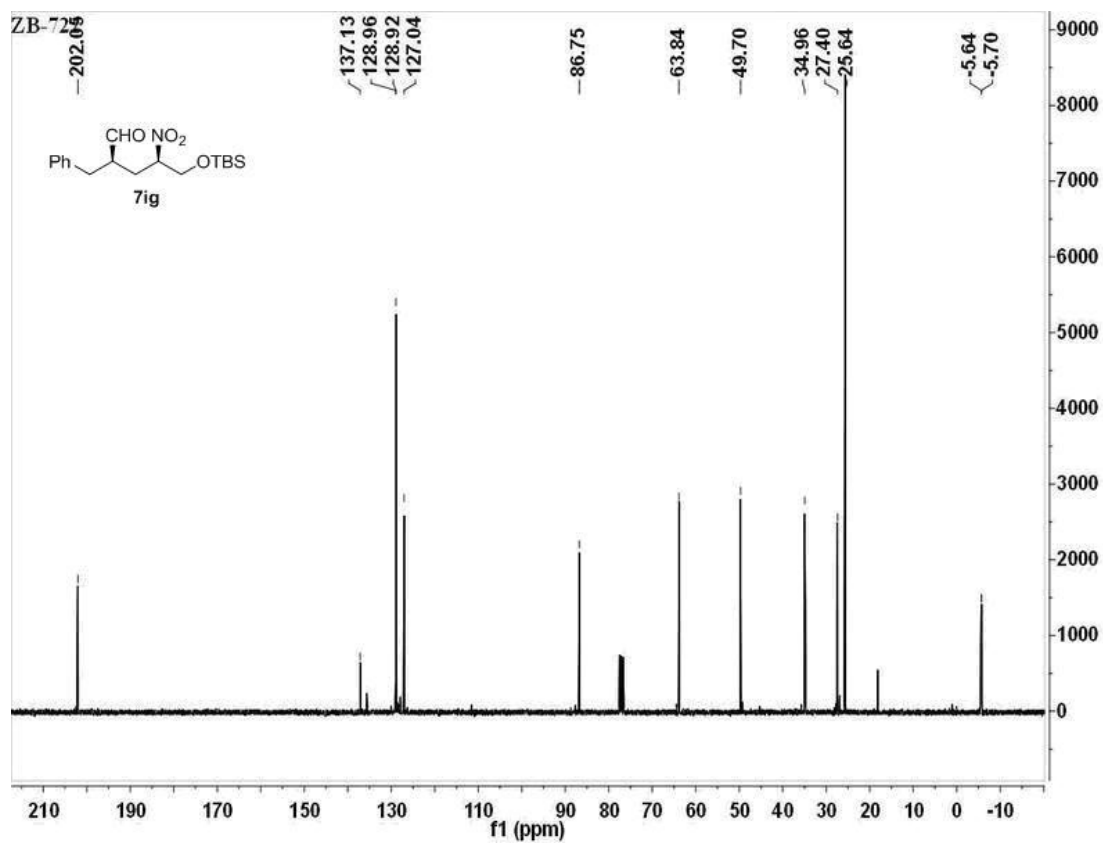

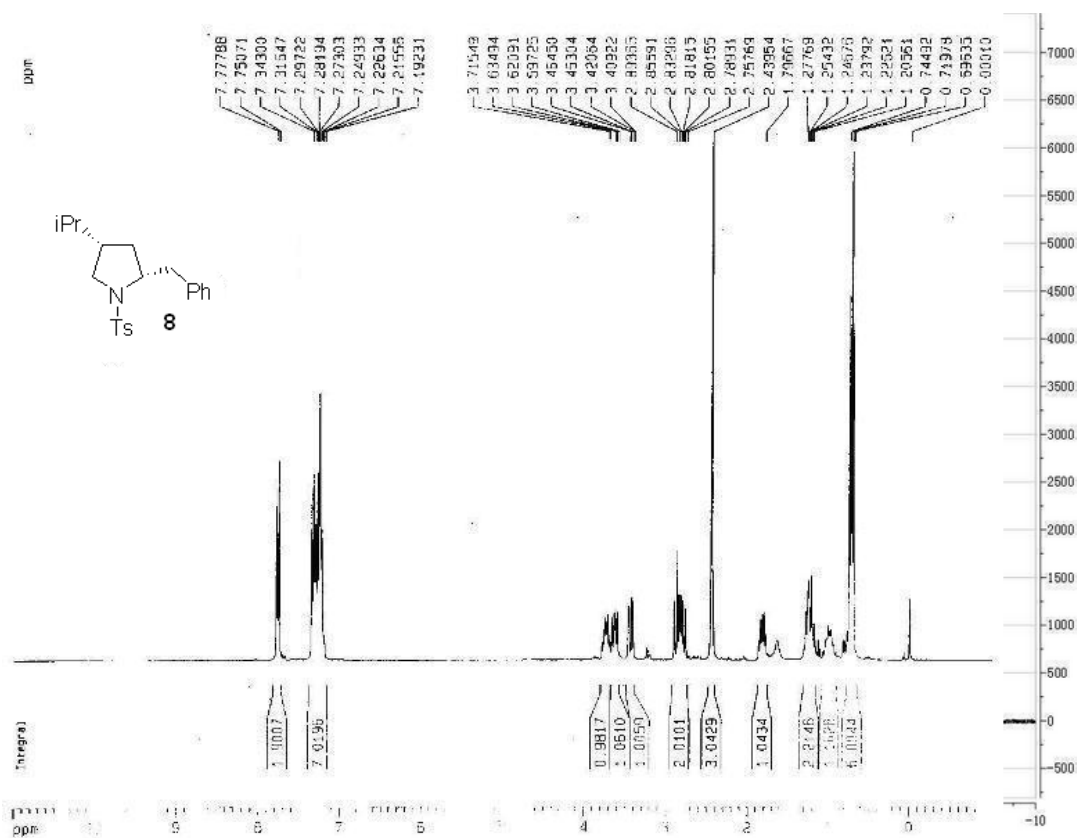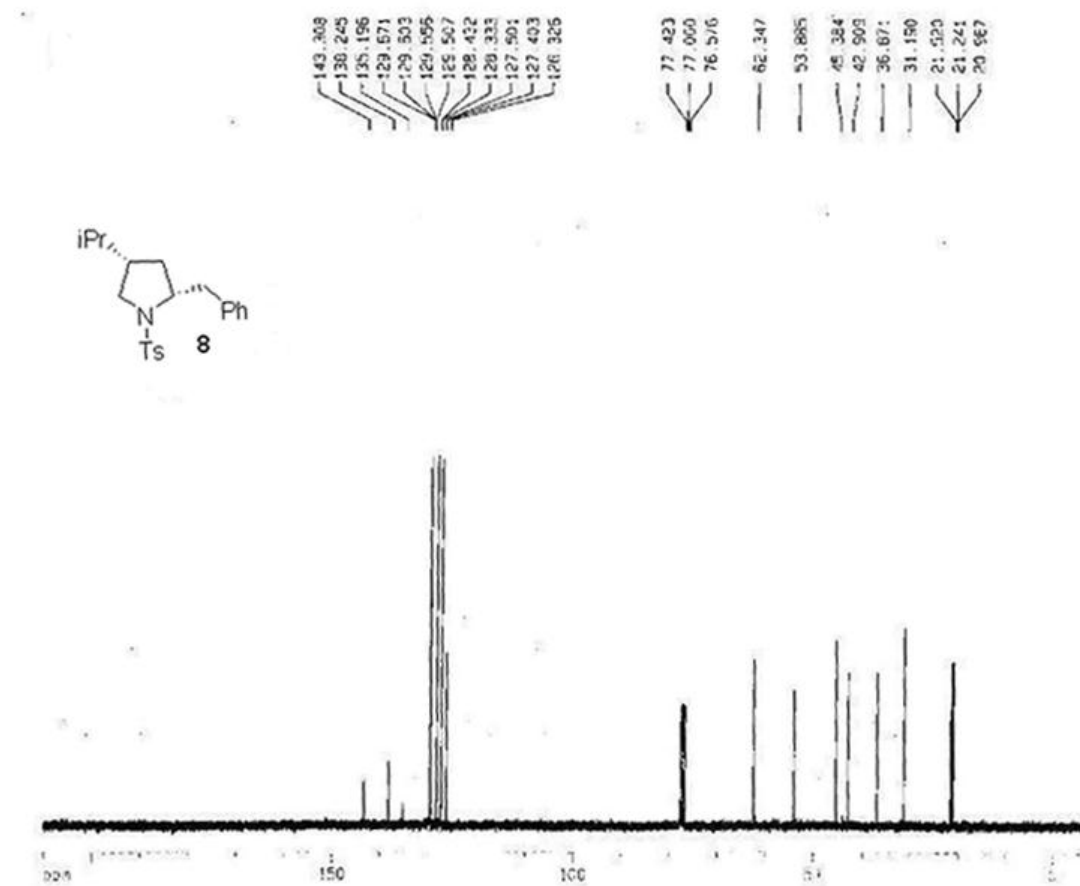

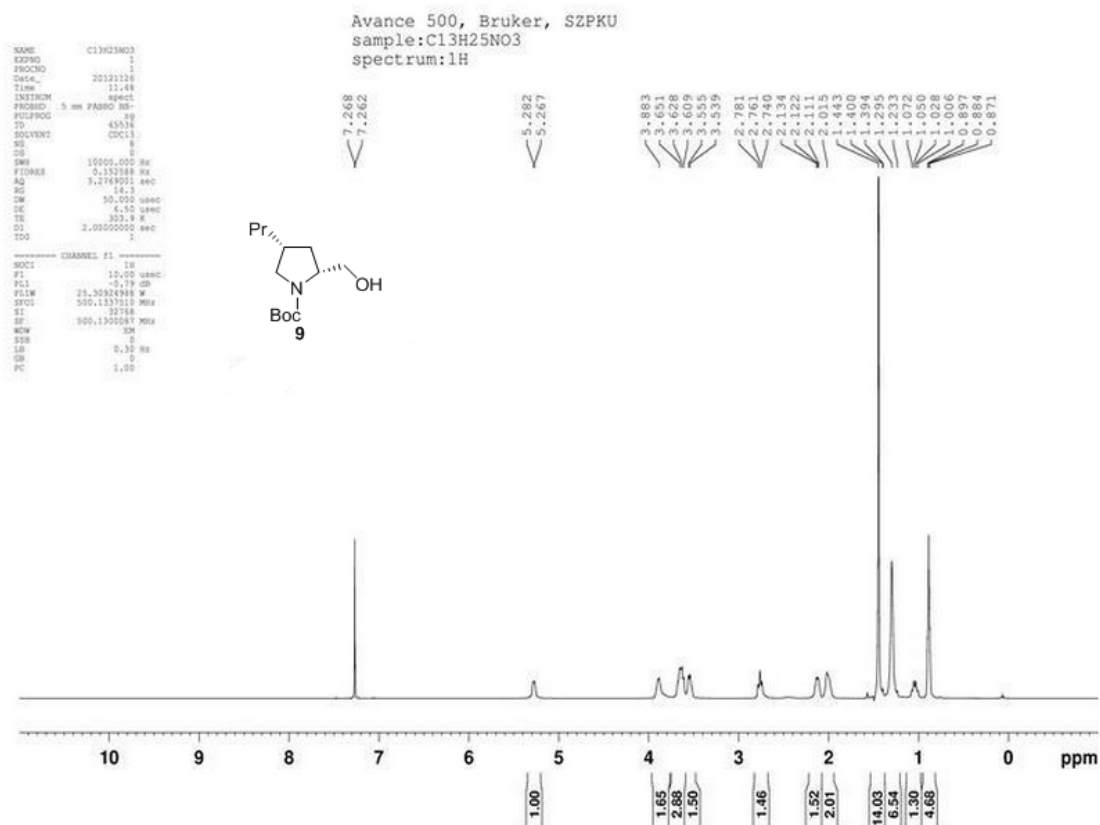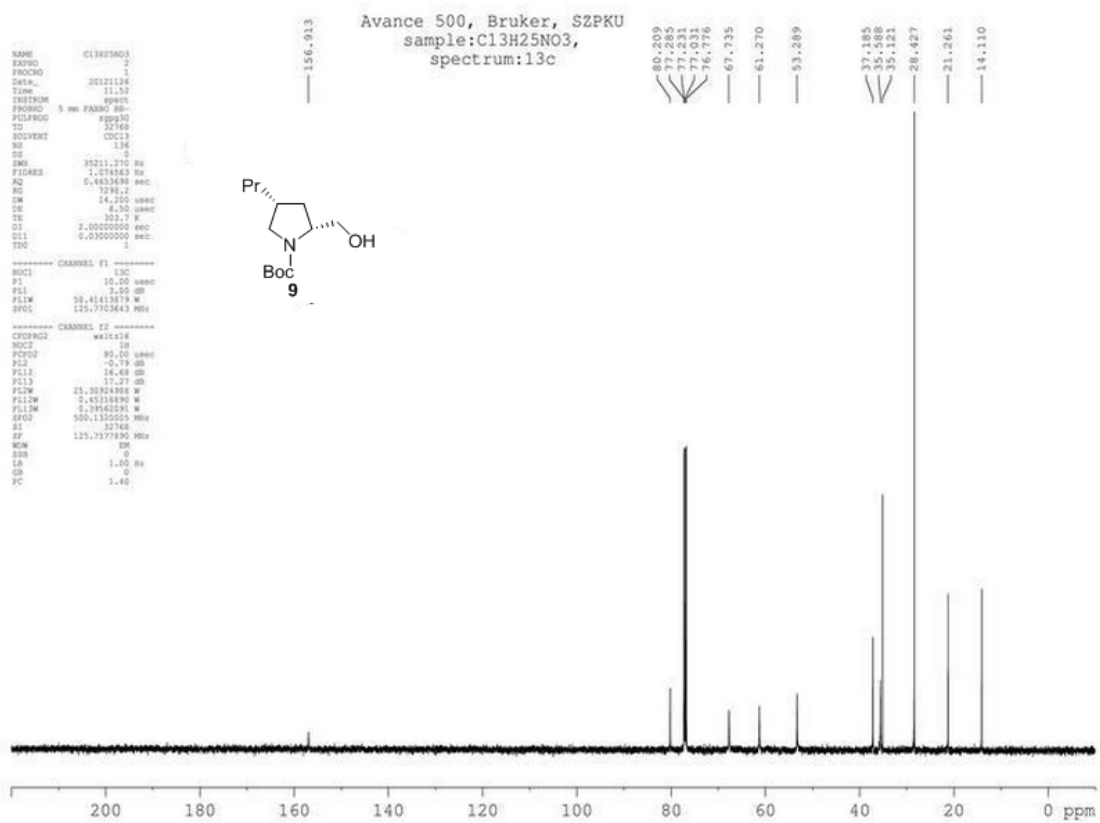

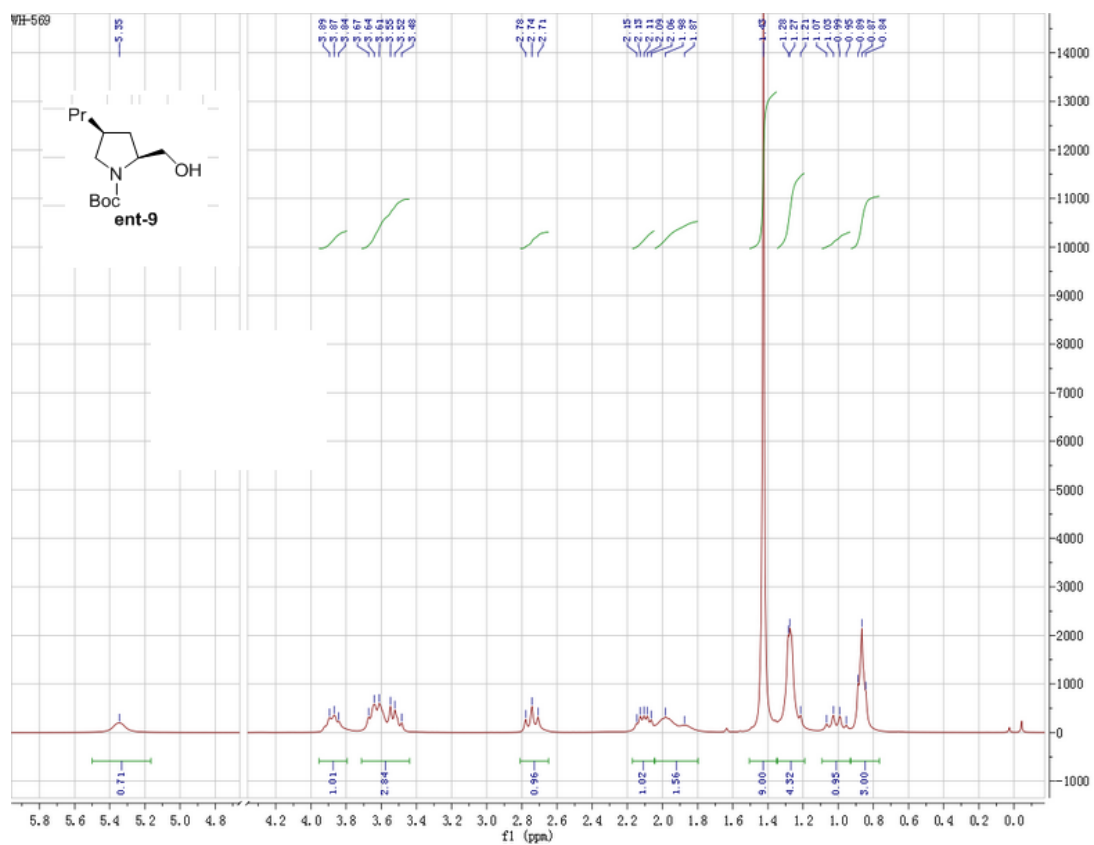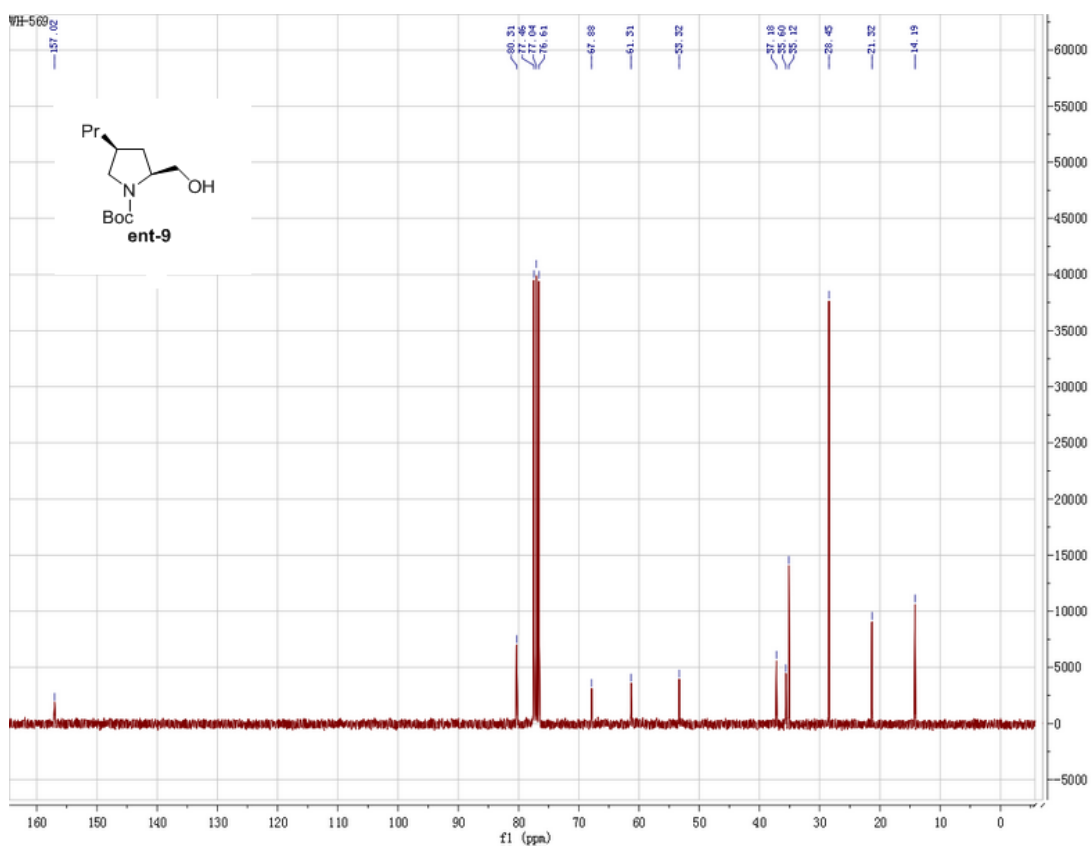



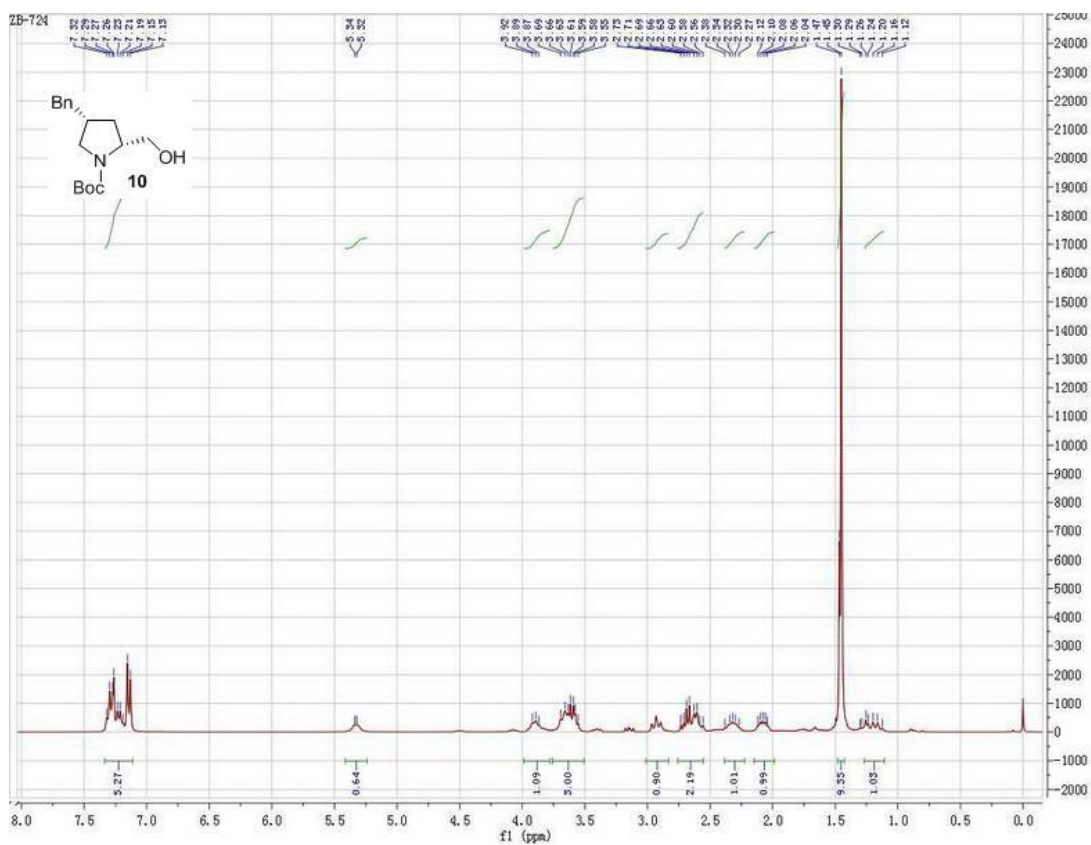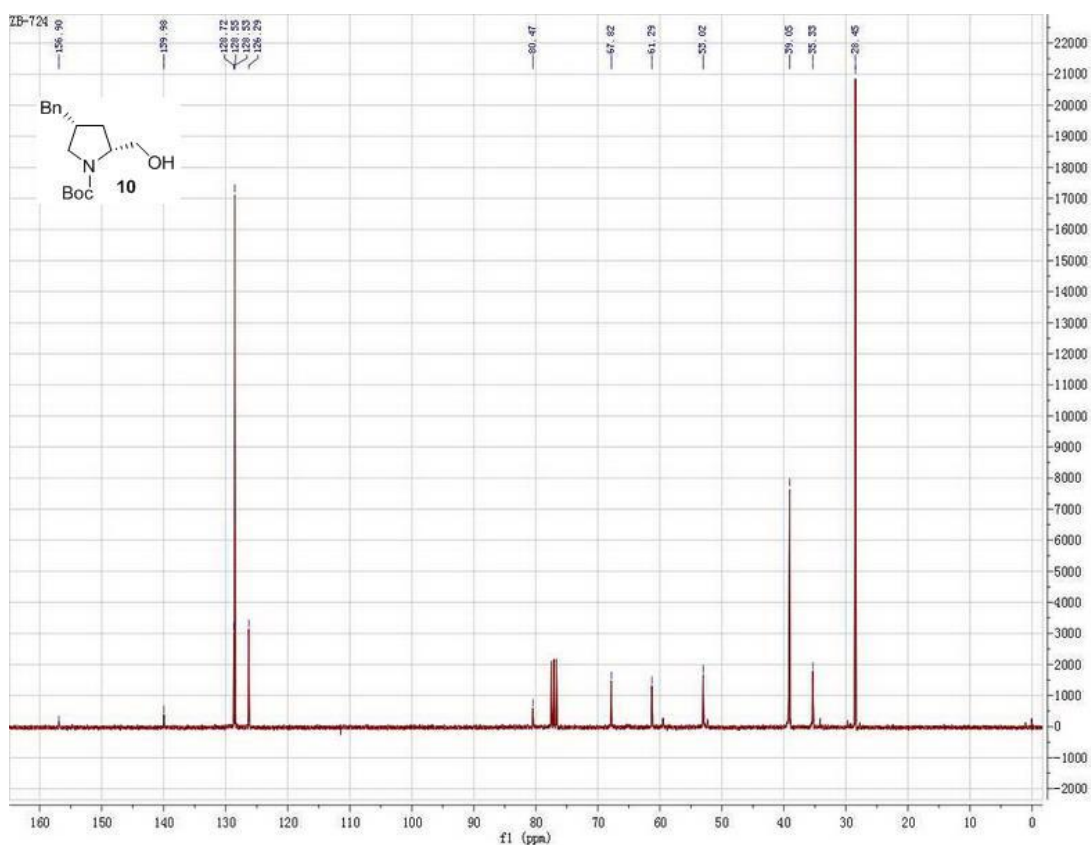

## 12. Part of the HPLC Analysis Data

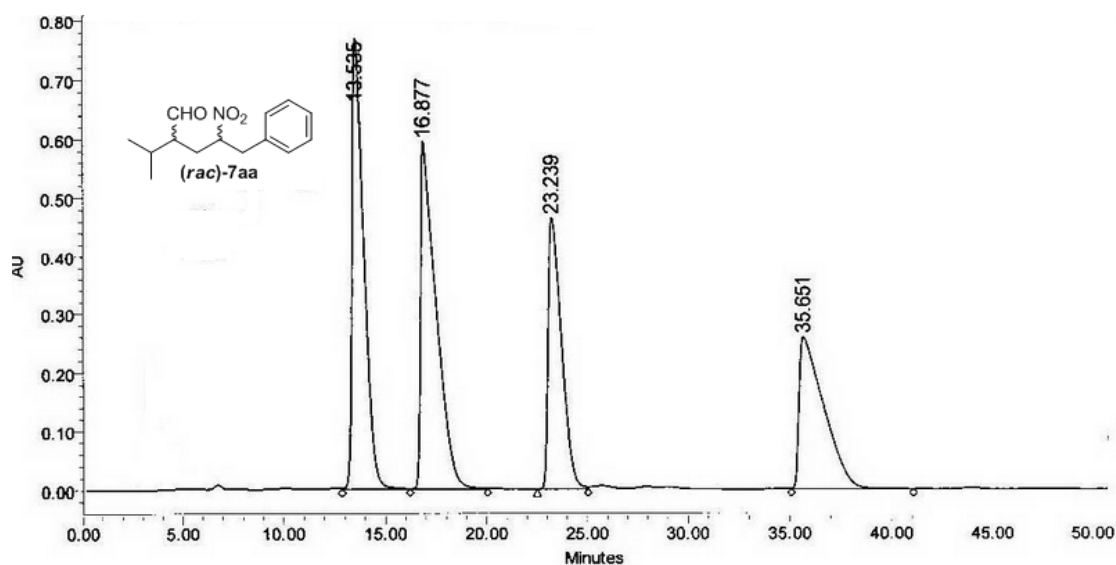

|   | RT (min) | Area ( $\mu\text{V}\cdot\text{sec}$ ) | % Area | Height ( $\mu\text{V}$ ) | % Height |
|---|----------|---------------------------------------|--------|--------------------------|----------|
| 1 | 13.535   | 30739489                              | 29.26  | 770201                   | 36.83    |
| 2 | 16.877   | 31324500                              | 29.82  | 597153                   | 28.55    |
| 3 | 23.239   | 21290111                              | 20.27  | 465821                   | 22.27    |
| 4 | 35.651   | 21704284                              | 20.66  | 258225                   | 12.35    |

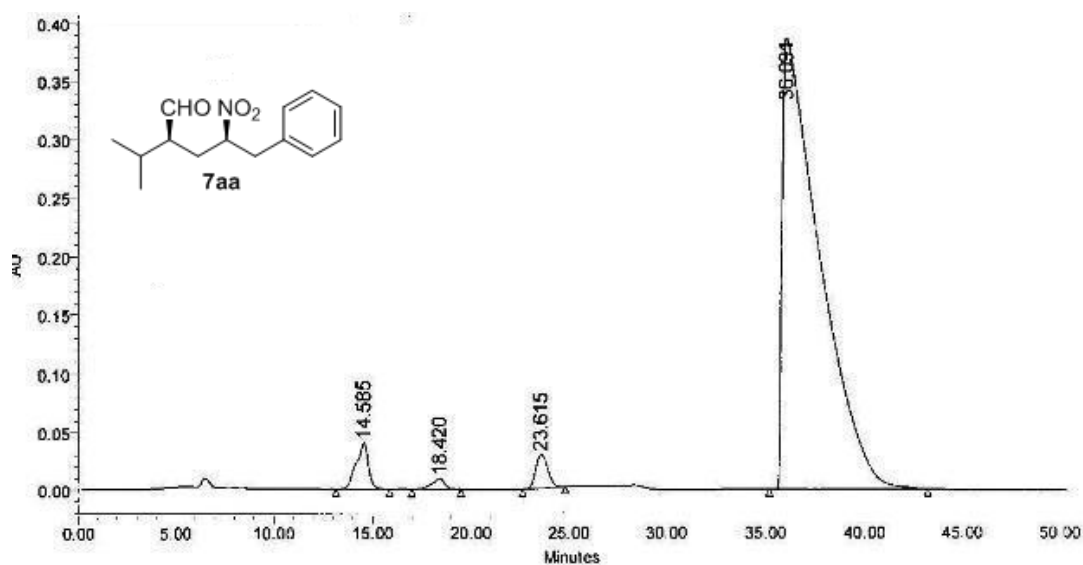

|   | RT (min) | Area ( $\mu\text{V}\cdot\text{sec}$ ) | % Area | Height ( $\mu\text{V}$ ) | % Height |
|---|----------|---------------------------------------|--------|--------------------------|----------|
| 1 | 14.585   | 1719211                               | 3.17   | 40462                    | 8.67     |
| 2 | 18.420   | 434492                                | 0.80   | 9249                     | 1.98     |
| 3 | 23.615   | 1235359                               | 2.28   | 29238                    | 6.26     |
| 4 | 36.091   | 50843135                              | 93.75  | 387880                   | 83.09    |

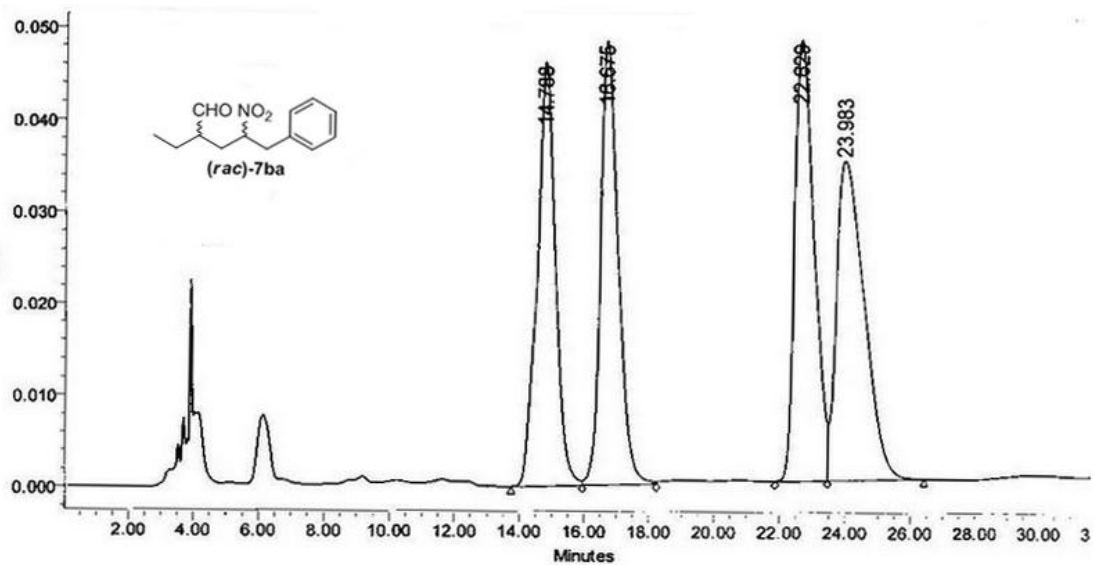

|   | RT (min) | Area ( $\mu\text{V}\cdot\text{sec}$ ) | % Area | Height ( $\mu\text{V}$ ) | % Height |
|---|----------|---------------------------------------|--------|--------------------------|----------|
| 1 | 14.788   | 1806194                               | 23.61  | 46197                    | 26.01    |
| 2 | 16.675   | 1818613                               | 23.77  | 48362                    | 27.23    |
| 3 | 22.629   | 1970697                               | 25.76  | 48098                    | 27.08    |
| 4 | 23.983   | 2054797                               | 26.86  | 34948                    | 19.68    |

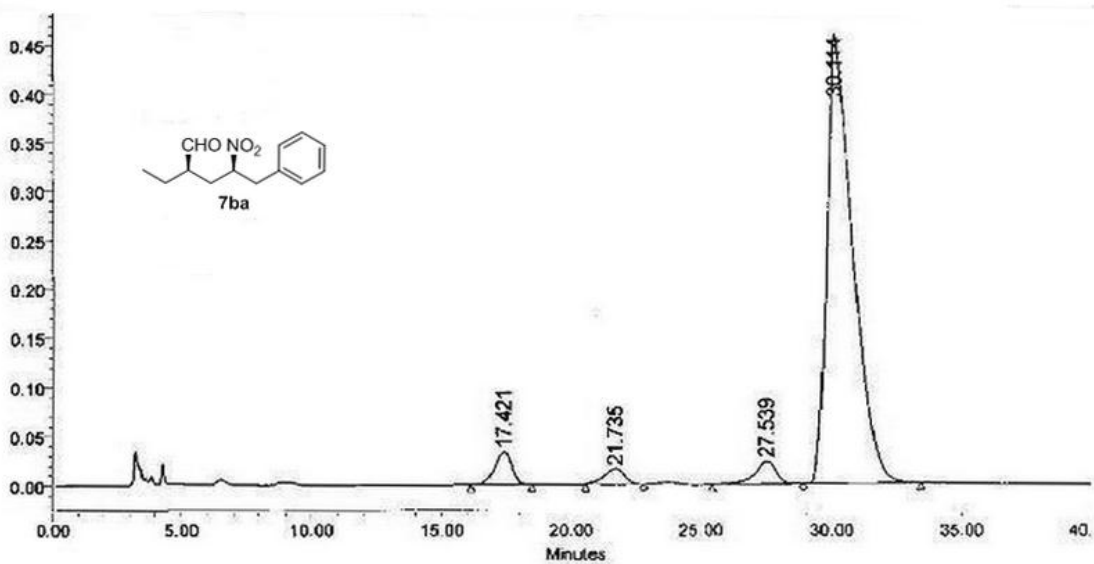

|   | RT (min) | Area ( $\mu\text{V}\cdot\text{sec}$ ) | % Area | Height ( $\mu\text{V}$ ) | % Height |
|---|----------|---------------------------------------|--------|--------------------------|----------|
| 1 | 17.421   | 1483209                               | 4.25   | 32999                    | 6.20     |
| 2 | 21.735   | 826097                                | 2.37   | 15355                    | 2.88     |
| 3 | 27.539   | 1260629                               | 3.61   | 23031                    | 4.33     |
| 4 | 30.114   | 31321611                              | 89.77  | 460919                   | 86.59    |

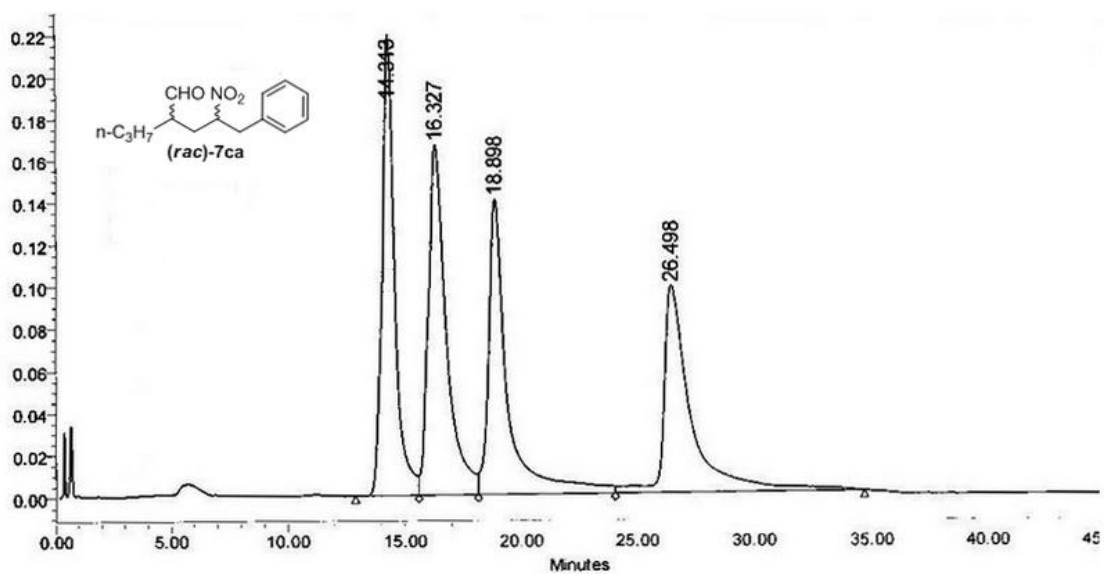

|   | RT (min) | Area ( $\mu\text{V}\cdot\text{sec}$ ) | % Area | Height ( $\mu\text{V}$ ) | % Height |
|---|----------|---------------------------------------|--------|--------------------------|----------|
| 1 | 14.313   | 8083949                               | 24.66  | 219311                   | 35.16    |
| 2 | 16.327   | 8942405                               | 27.28  | 166620                   | 26.71    |
| 3 | 18.898   | 7875459                               | 24.03  | 139753                   | 22.40    |
| 4 | 26.498   | 7876243                               | 24.03  | 98123                    | 15.73    |

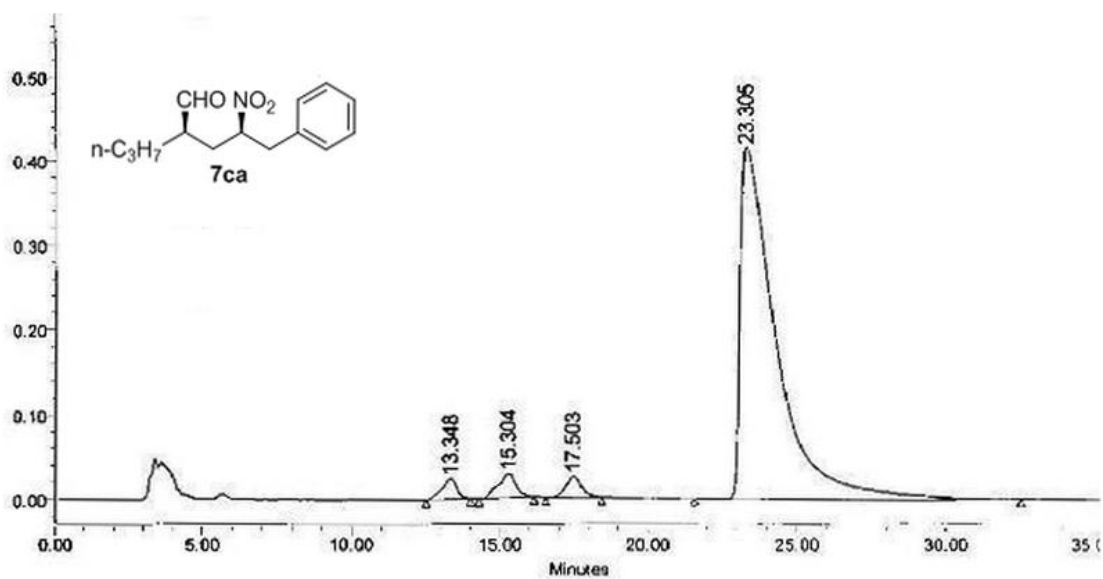

|   | RT (min) | Area ( $\mu\text{V}\cdot\text{sec}$ ) | % Area | Height ( $\mu\text{V}$ ) | % Height |
|---|----------|---------------------------------------|--------|--------------------------|----------|
| 1 | 13.348   | 799348                                | 2.12   | 23675                    | 4.80     |
| 2 | 15.304   | 1178250                               | 3.13   | 28167                    | 5.71     |
| 3 | 17.503   | 904265                                | 2.40   | 24742                    | 5.01     |
| 4 | 23.305   | 34762802                              | 92.34  | 416797                   | 84.48    |

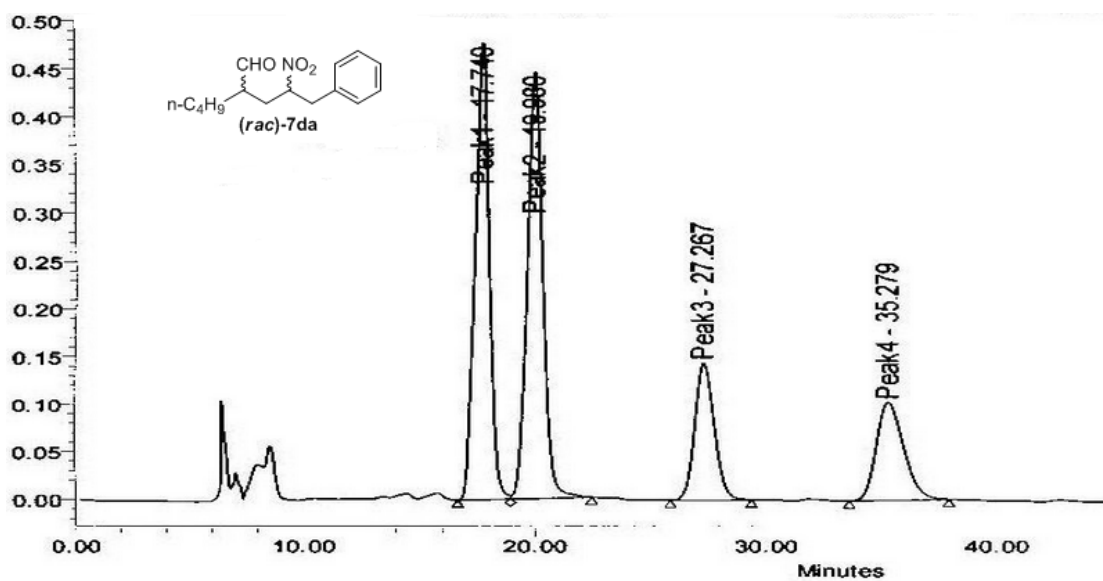

|   | Peak Name | RT (min) | Area ( $\mu\text{V}\cdot\text{sec}$ ) | % Area | Height ( $\mu\text{V}$ ) | % Height |
|---|-----------|----------|---------------------------------------|--------|--------------------------|----------|
| 1 | Peak1     | 17.740   | 20296022                              | 35.02  | 477987                   | 40.80    |
| 2 | Peak2     | 19.980   | 20787648                              | 35.87  | 446629                   | 38.12    |
| 3 | Peak3     | 27.267   | 8425383                               | 14.54  | 144159                   | 12.31    |
| 4 | Peak4     | 35.279   | 8445874                               | 14.57  | 102728                   | 8.77     |

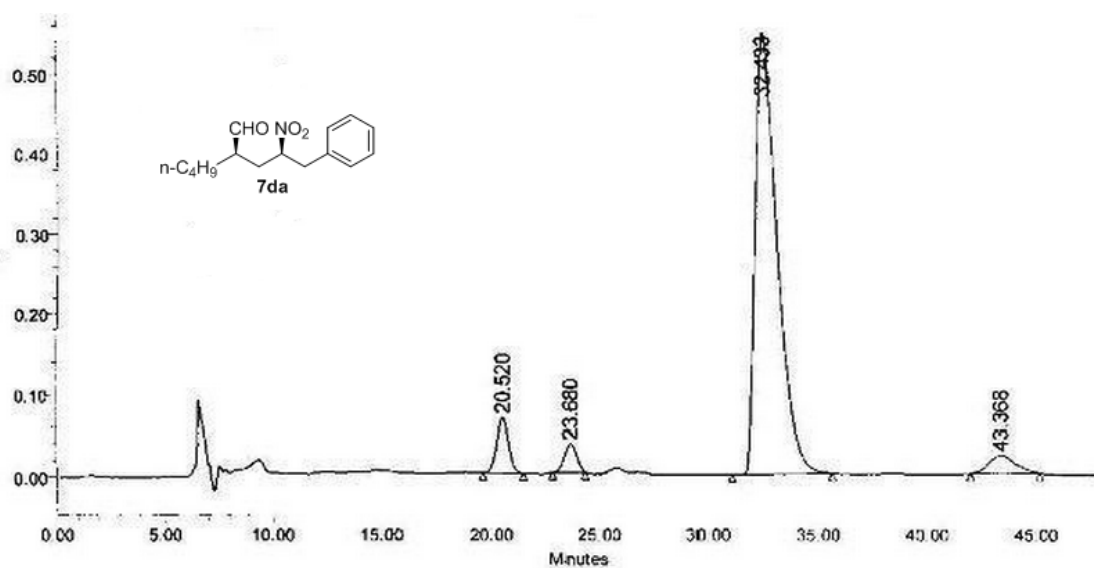

|   | RT (min) | Area ( $\mu\text{V}\cdot\text{sec}$ ) | % Area | Height ( $\mu\text{V}$ ) | % Height |
|---|----------|---------------------------------------|--------|--------------------------|----------|
| 1 | 20.520   | 2516260                               | 5.79   | 66772                    | 9.93     |
| 2 | 23.680   | 1328798                               | 3.06   | 34246                    | 5.09     |
| 3 | 32.433   | 37751410                              | 86.83  | 549108                   | 81.69    |
| 4 | 43.368   | 1881218                               | 4.33   | 22081                    | 3.28     |



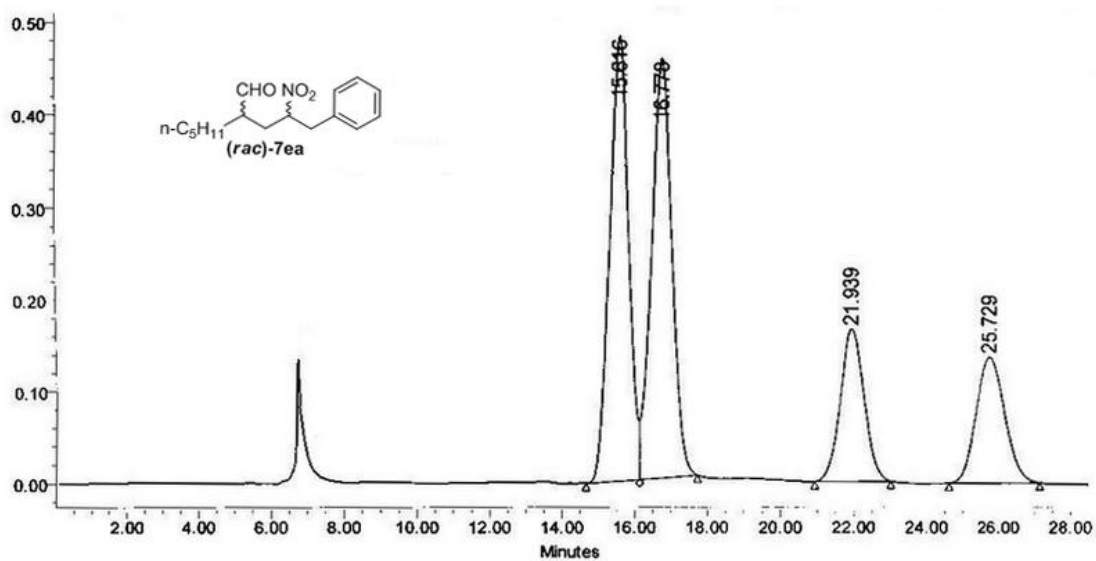

|   | RT (min) | Area (μV*sec) | % Area | Height (μV) | % Height |
|---|----------|---------------|--------|-------------|----------|
| 1 | 15.616   | 17472439      | 34.89  | 482461      | 38.85    |
| 2 | 16.778   | 17629500      | 35.20  | 455708      | 36.70    |
| 3 | 21.939   | 7470671       | 14.92  | 166150      | 13.38    |
| 4 | 25.729   | 7506835       | 14.99  | 137413      | 11.07    |

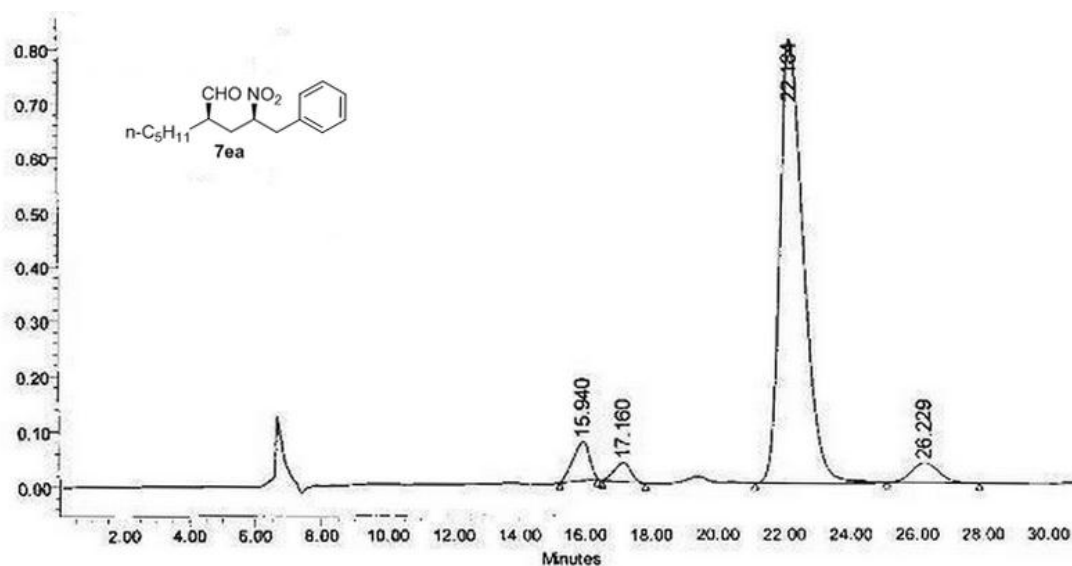

|   | RT (min) | Area (μV*sec) | % Area | Height (μV) | % Height |
|---|----------|---------------|--------|-------------|----------|
| 1 | 15.940   | 2382455       | 5.25   | 70225       | 7.35     |
| 2 | 17.160   | 1184917       | 2.61   | 34604       | 3.62     |
| 3 | 22.184   | 39727192      | 87.47  | 813813      | 85.21    |
| 4 | 26.229   | 2123673       | 4.68   | 36419       | 3.81     |



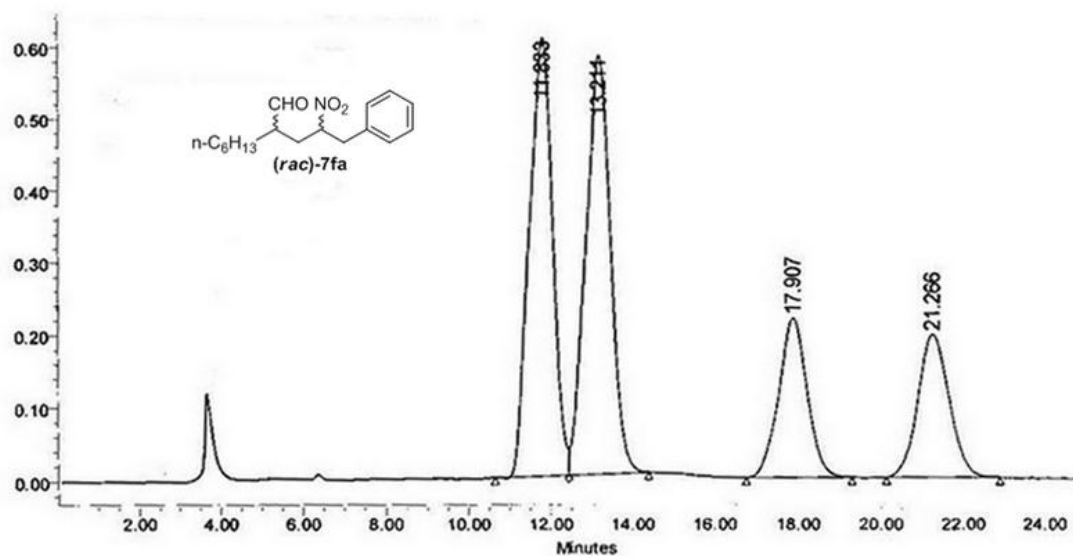

|   | RT (min) | Area (μV*sec) | % Area | Height (μV) | % Height |
|---|----------|---------------|--------|-------------|----------|
| 1 | 11.833   | 23697327      | 34.58  | 606142      | 37.88    |
| 2 | 13.211   | 24140914      | 35.23  | 579896      | 36.24    |
| 3 | 17.907   | 10322704      | 15.06  | 218190      | 13.63    |
| 4 | 21.266   | 10370309      | 15.13  | 196075      | 12.25    |

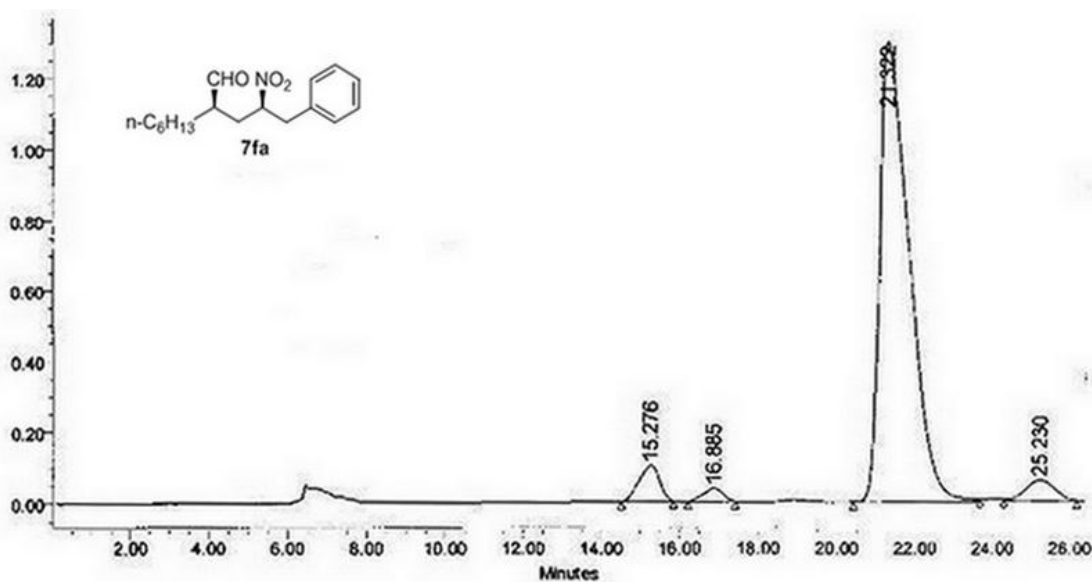

|   | RT (min) | Area (μV*sec) | % Area | Height (μV) | % Height |
|---|----------|---------------|--------|-------------|----------|
| 1 | 15.276   | 3566918       | 4.74   | 99496       | 6.67     |
| 2 | 16.885   | 1223977       | 1.63   | 35783       | 2.40     |
| 3 | 21.322   | 67429802      | 89.59  | 1299174     | 87.09    |
| 4 | 25.230   | 3048345       | 4.05   | 57287       | 3.84     |

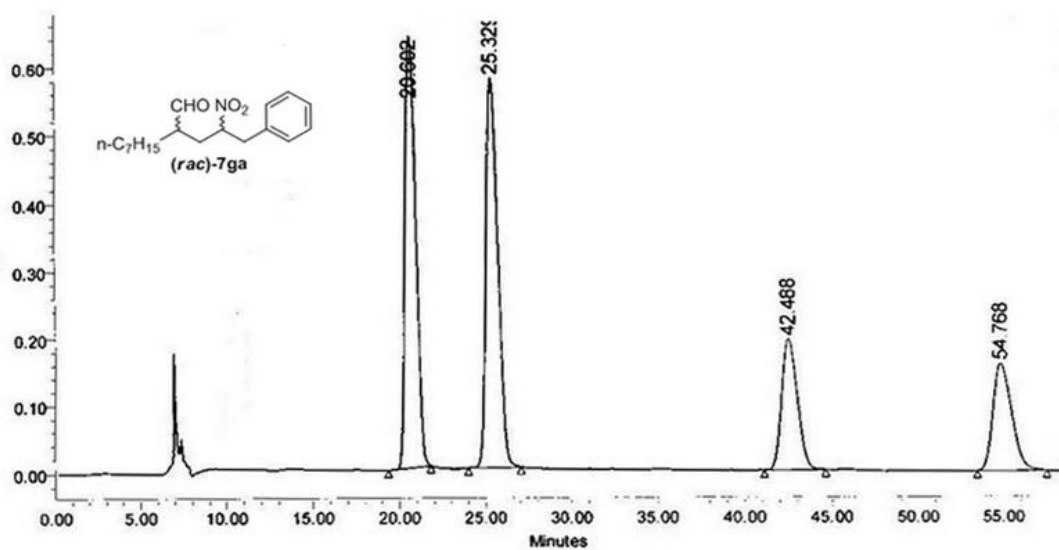

|   | RT (min) | Area (μV*sec) | % Area | Height (μV) | % Height |
|---|----------|---------------|--------|-------------|----------|
| 1 | 20.602   | 27316967      | 34.57  | 637574      | 40.67    |
| 2 | 25.329   | 27601153      | 34.93  | 576149      | 36.75    |
| 3 | 42.488   | 12099995      | 15.31  | 194748      | 12.42    |
| 4 | 54.768   | 11998433      | 15.18  | 159178      | 10.15    |

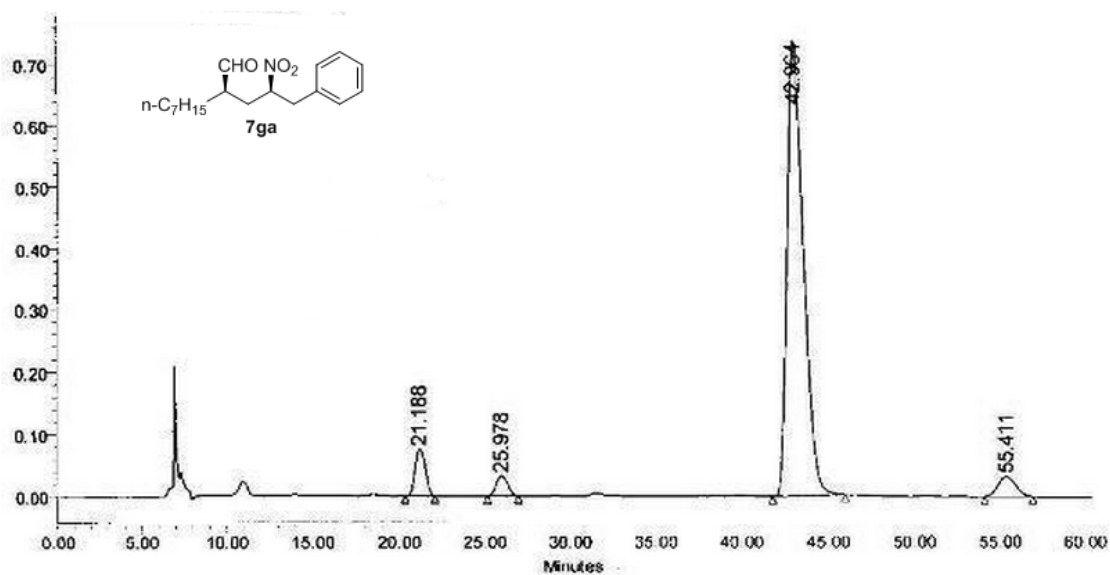

|   | RT (min) | Area (μV*sec) | % Area | Height (μV) | % Height |
|---|----------|---------------|--------|-------------|----------|
| 1 | 21.188   | 3087177       | 5.65   | 75004       | 8.52     |
| 2 | 25.978   | 1508290       | 2.76   | 32045       | 3.64     |
| 3 | 42.964   | 47725533      | 87.29  | 740850      | 84.18    |
| 4 | 55.411   | 2351853       | 4.30   | 32199       | 3.66     |

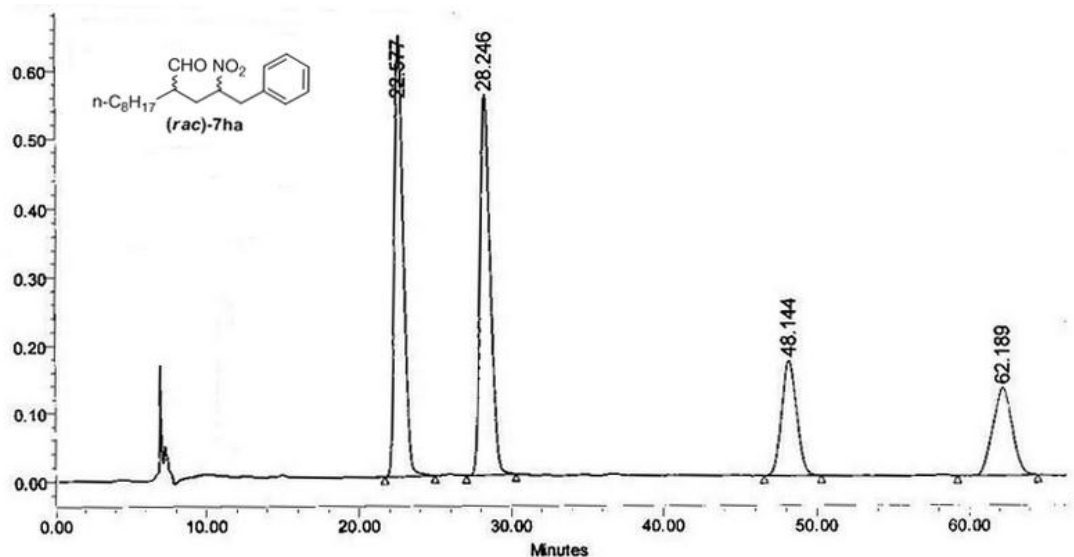

|   | RT (min) | Area ( $\mu\text{V}\cdot\text{sec}$ ) | % Area | Height ( $\mu\text{V}$ ) | % Height |
|---|----------|---------------------------------------|--------|--------------------------|----------|
| 1 | 22.577   | 26434087                              | 34.98  | 645365                   | 42.88    |
| 2 | 28.246   | 26238069                              | 34.72  | 557500                   | 37.05    |
| 3 | 48.144   | 11488728                              | 15.20  | 171376                   | 11.39    |
| 4 | 62.189   | 11400056                              | 15.09  | 130676                   | 8.68     |

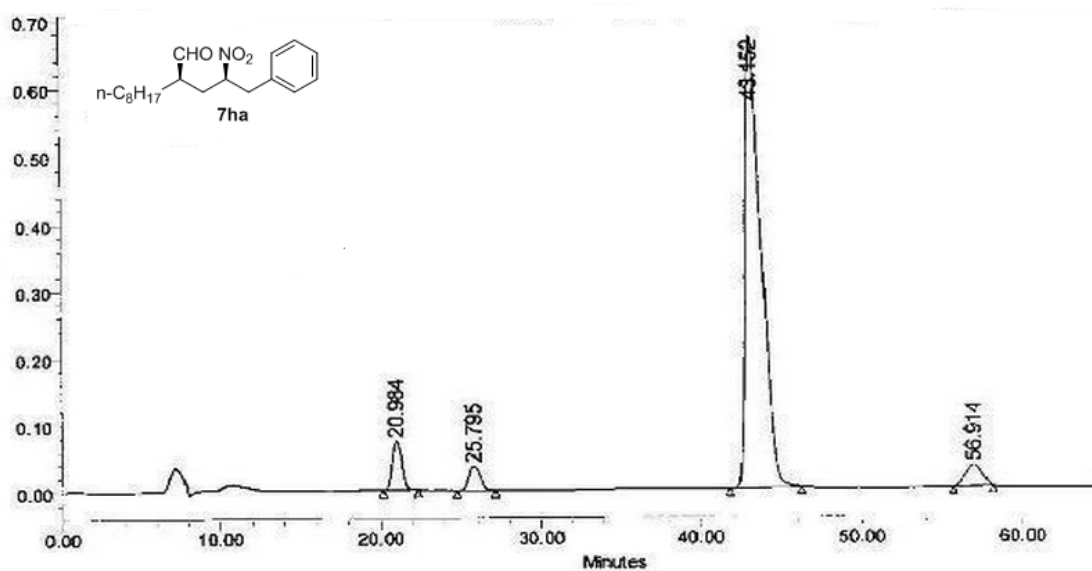

|   | RT (min) | Area ( $\mu\text{V}\cdot\text{sec}$ ) | % Area | Height ( $\mu\text{V}$ ) | % Height |
|---|----------|---------------------------------------|--------|--------------------------|----------|
| 1 | 20.984   | 3058457                               | 5.69   | 72212                    | 8.90     |
| 2 | 25.795   | 1723492                               | 3.21   | 35519                    | 4.38     |
| 3 | 43.152   | 46741784                              | 86.97  | 672313                   | 82.89    |
| 4 | 56.914   | 2222280                               | 4.13   | 31084                    | 3.83     |

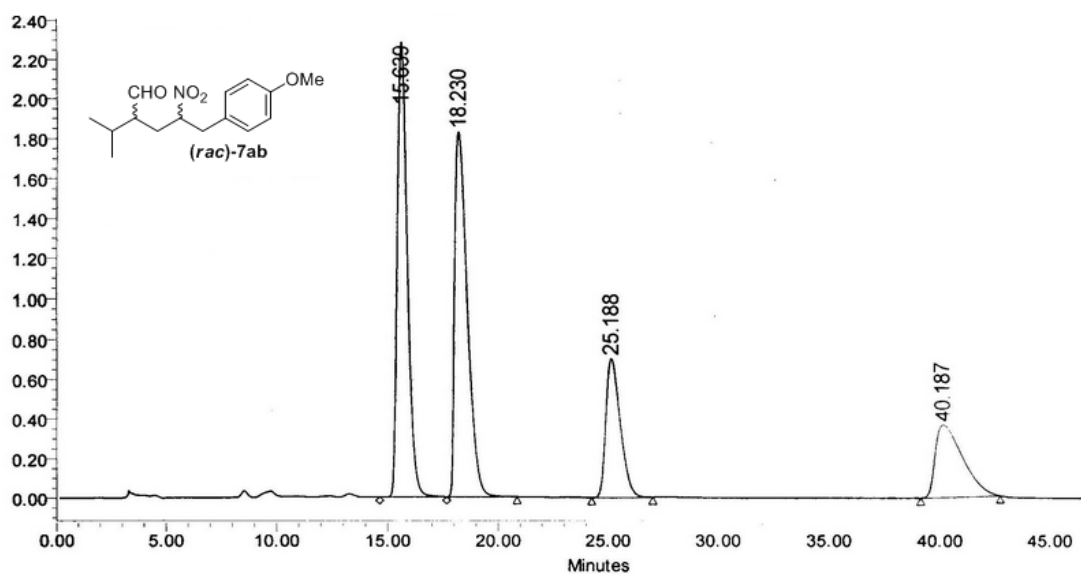

|   | RT (min) | Area ( $\mu\text{V}\cdot\text{sec}$ ) | % Area | Height ( $\mu\text{V}$ ) | % Height |
|---|----------|---------------------------------------|--------|--------------------------|----------|
| 1 | 15.639   | 72224872                              | 34.60  | 2286659                  | 44.10    |
| 2 | 18.230   | 72770187                              | 34.86  | 1827097                  | 35.24    |
| 3 | 25.188   | 32013005                              | 15.34  | 703821                   | 13.57    |
| 4 | 40.187   | 31717953                              | 15.20  | 367493                   | 7.09     |

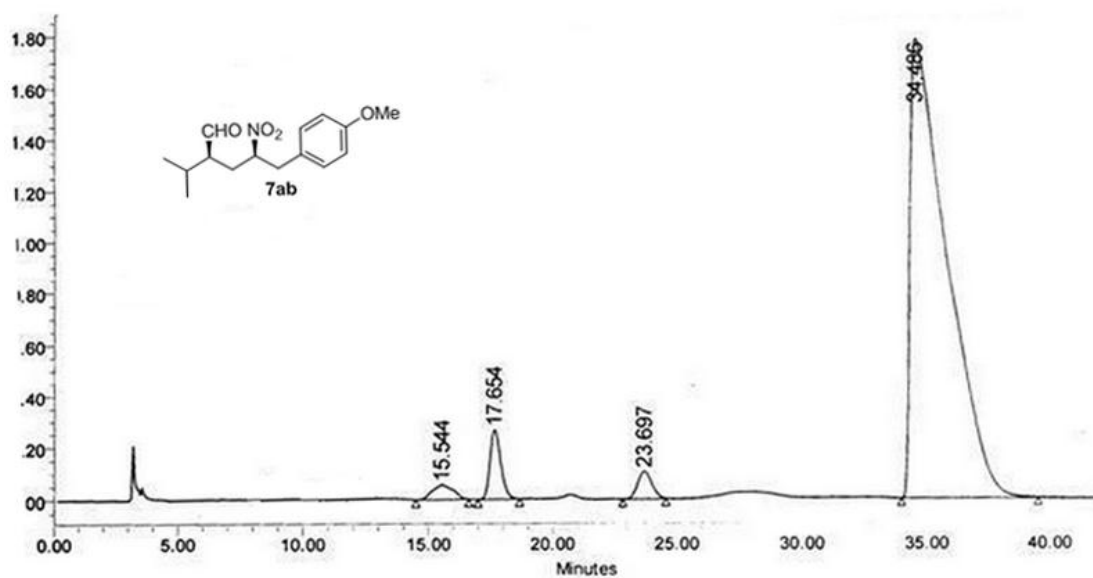

|   | RT (min) | Area ( $\mu\text{V}\cdot\text{sec}$ ) | % Area | Height ( $\mu\text{V}$ ) | % Height |
|---|----------|---------------------------------------|--------|--------------------------|----------|
| 1 | 15.544   | 3222958                               | 1.63   | 55522                    | 2.51     |
| 2 | 17.654   | 7943792                               | 4.03   | 264779                   | 11.95    |
| 3 | 23.697   | 4135651                               | 2.10   | 105086                   | 4.74     |
| 4 | 34.486   | 181933239                             | 92.24  | 1790014                  | 80.80    |

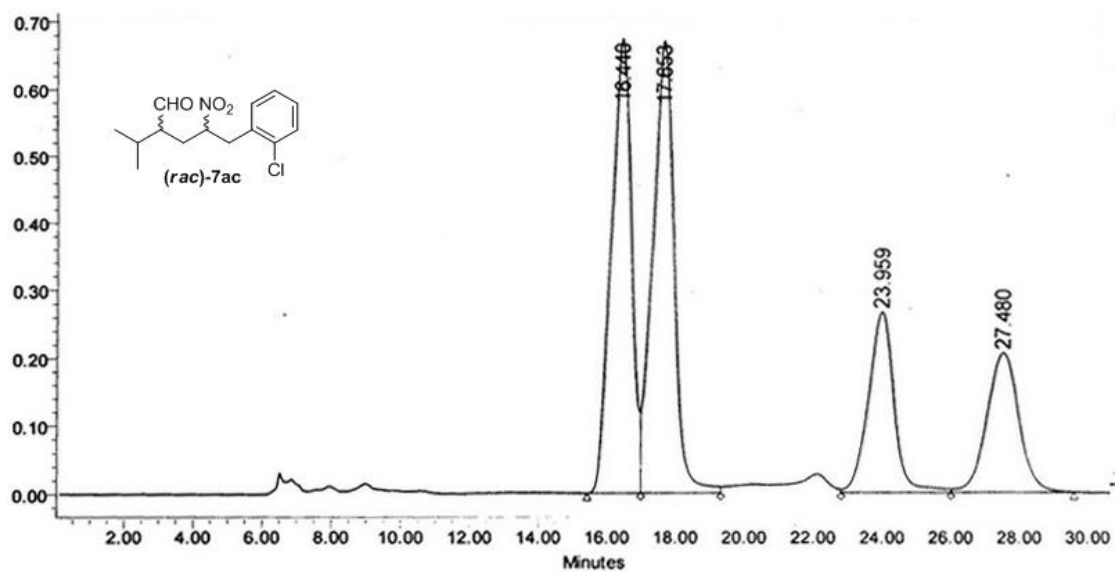

|   | RT (min) | Area ( $\mu\text{V}\cdot\text{sec}$ ) | % Area | Height ( $\mu\text{V}$ ) | % Height |
|---|----------|---------------------------------------|--------|--------------------------|----------|
| 1 | 16.440   | 27585794                              | 32.90  | 676098                   | 37.11    |
| 2 | 17.653   | 29011686                              | 34.60  | 673128                   | 36.94    |
| 3 | 23.959   | 13796391                              | 16.46  | 266734                   | 14.64    |
| 4 | 27.480   | 13445099                              | 16.04  | 206024                   | 11.31    |

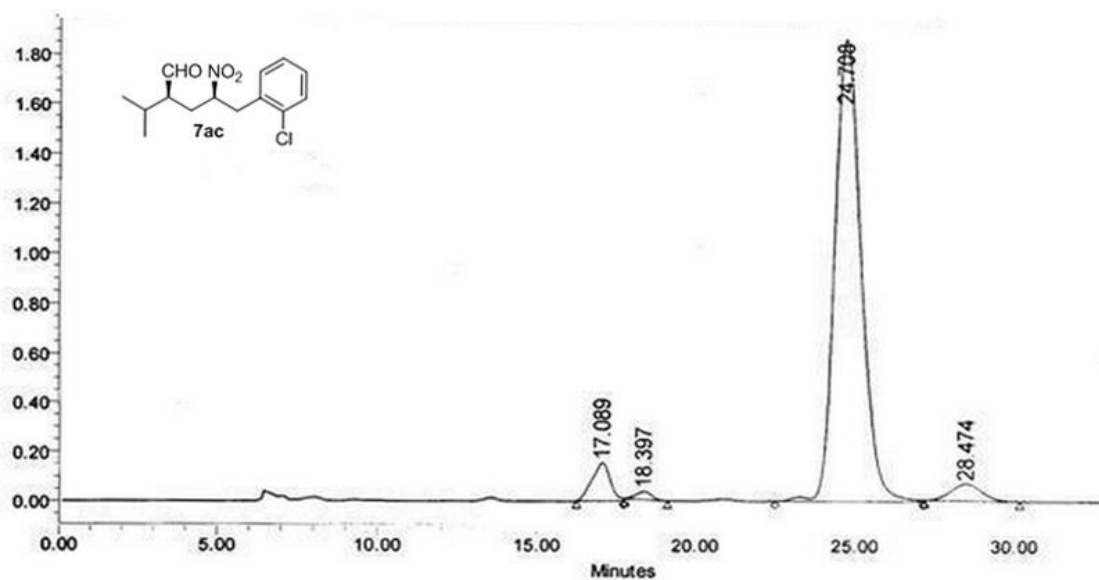

|   | RT (min) | Area ( $\mu\text{V}\cdot\text{sec}$ ) | % Area | Height ( $\mu\text{V}$ ) | % Height |
|---|----------|---------------------------------------|--------|--------------------------|----------|
| 1 | 17.089   | 6204820                               | 5.24   | 154495                   | 7.27     |
| 2 | 18.397   | 1070017                               | 0.90   | 32255                    | 1.52     |
| 3 | 24.708   | 106498839                             | 89.95  | 1868027                  | 87.96    |
| 4 | 28.474   | 4620205                               | 3.90   | 69057                    | 3.25     |

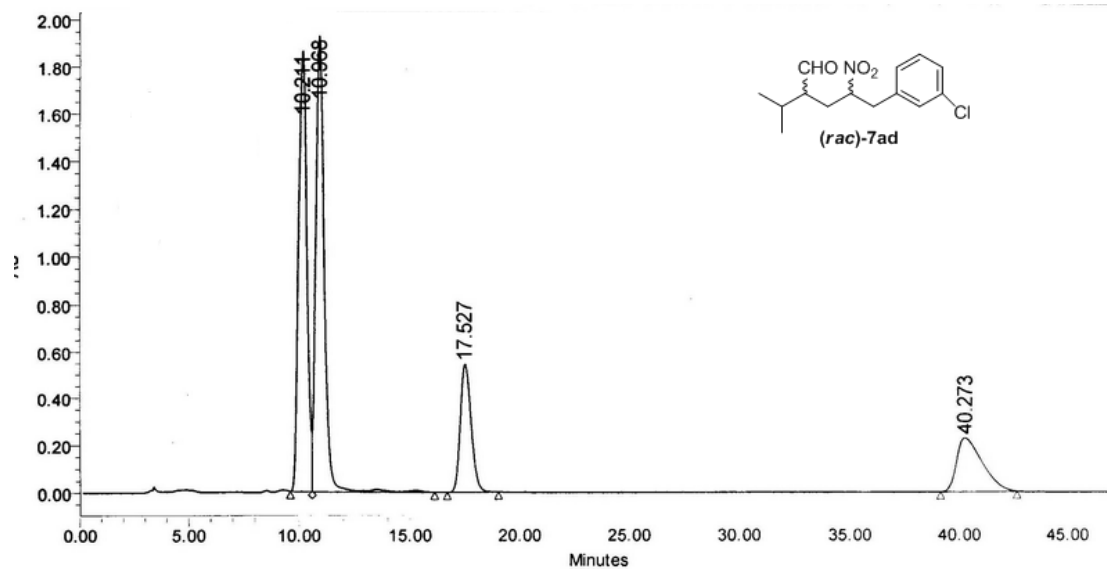

|   | RT<br>(min) | Area<br>( $\mu\text{V}\cdot\text{sec}$ ) | % Area | Height<br>( $\mu\text{V}$ ) | % Height |
|---|-------------|------------------------------------------|--------|-----------------------------|----------|
| 1 | 10.211      | 48488270                                 | 35.28  | 1863207                     | 40.81    |
| 2 | 10.968      | 51801958                                 | 37.69  | 1928009                     | 42.23    |
| 3 | 17.527      | 18653462                                 | 13.57  | 546549                      | 11.97    |
| 4 | 40.273      | 18484505                                 | 13.45  | 227758                      | 4.99     |

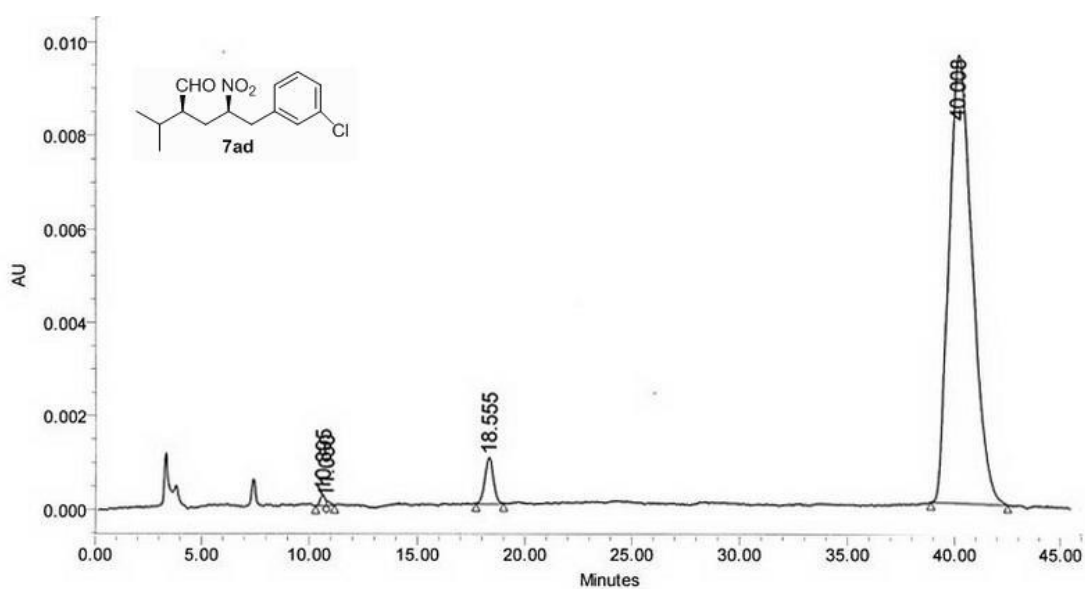

|   | RT<br>(min) | Area<br>( $\mu\text{V}\cdot\text{sec}$ ) | % Area | Height<br>( $\mu\text{V}$ ) | % Height |
|---|-------------|------------------------------------------|--------|-----------------------------|----------|
| 1 | 10.895      | 3297                                     | 0.44   | 224                         | 2.06     |
| 2 | 11.050      | 1100                                     | 0.15   | 97                          | 0.89     |
| 3 | 18.555      | 26766                                    | 3.55   | 972                         | 8.94     |
| 4 | 40.008      | 722621                                   | 95.87  | 9584                        | 88.11    |



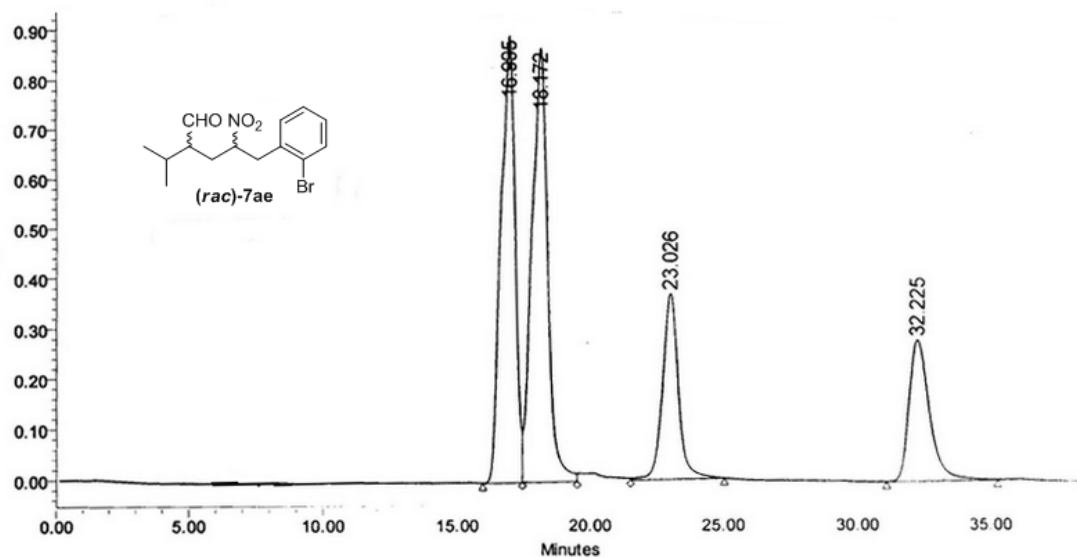

|   | RT (min) | Area ( $\mu\text{V}\cdot\text{sec}$ ) | % Area | Height ( $\mu\text{V}$ ) | % Height |
|---|----------|---------------------------------------|--------|--------------------------|----------|
| 1 | 16.995   | 33011400                              | 33.39  | 895796                   | 37.09    |
| 2 | 18.172   | 35782050                              | 36.19  | 869749                   | 36.01    |
| 3 | 23.026   | 15128536                              | 15.30  | 368809                   | 15.27    |
| 4 | 32.225   | 14954218                              | 15.12  | 280774                   | 11.63    |

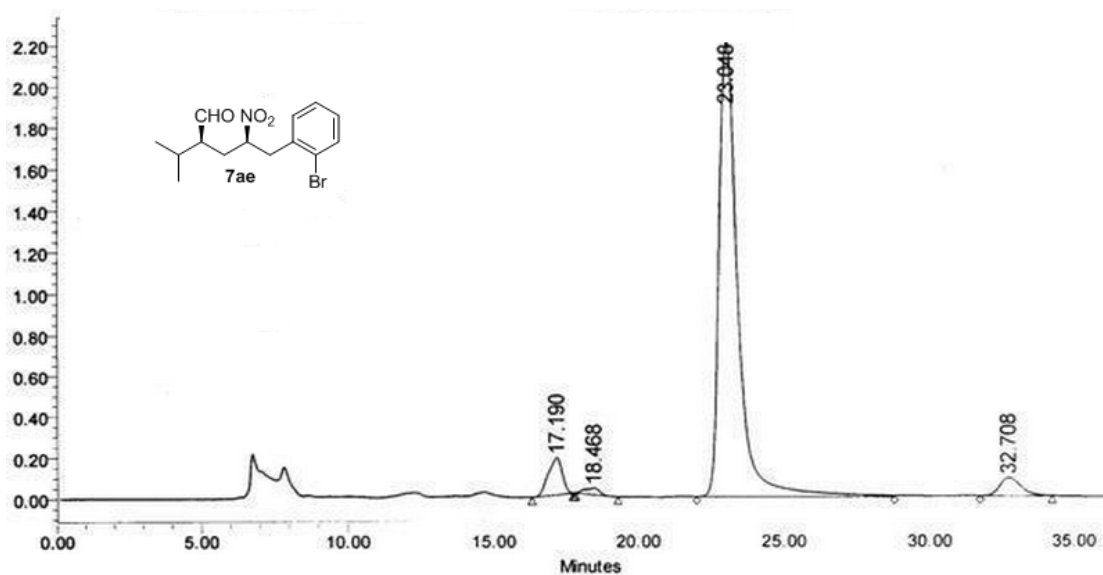

|   | RT (min) | Area ( $\mu\text{V}\cdot\text{sec}$ ) | % Area | Height ( $\mu\text{V}$ ) | % Height |
|---|----------|---------------------------------------|--------|--------------------------|----------|
| 1 | 17.190   | 6041886                               | 5.43   | 179979                   | 7.14     |
| 2 | 18.468   | 1141860                               | 1.03   | 32408                    | 1.28     |
| 3 | 23.048   | 99540290                              | 89.47  | 2220178                  | 88.03    |
| 4 | 32.708   | 4536146                               | 4.08   | 89490                    | 3.55     |



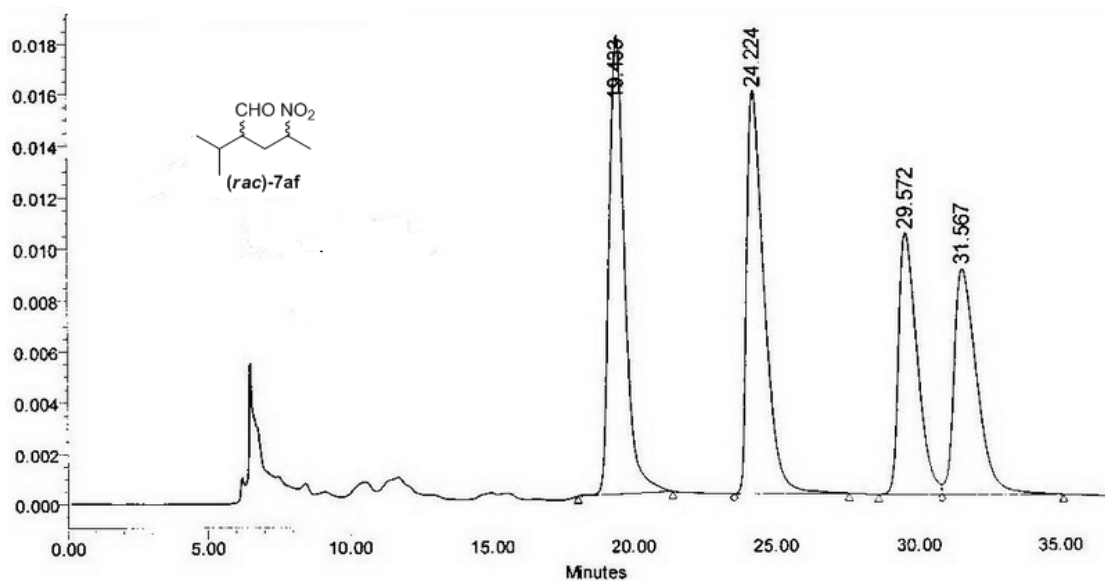

|   | RT (min) | Area ( $\mu\text{V}\cdot\text{sec}$ ) | % Area | Height ( $\mu\text{V}$ ) | % Height |
|---|----------|---------------------------------------|--------|--------------------------|----------|
| 1 | 19.433   | 686303                                | 29.61  | 17967                    | 33.93    |
| 2 | 24.224   | 667728                                | 28.80  | 15782                    | 29.80    |
| 3 | 29.572   | 467031                                | 20.15  | 10294                    | 19.44    |
| 4 | 31.567   | 497082                                | 21.44  | 8911                     | 16.83    |

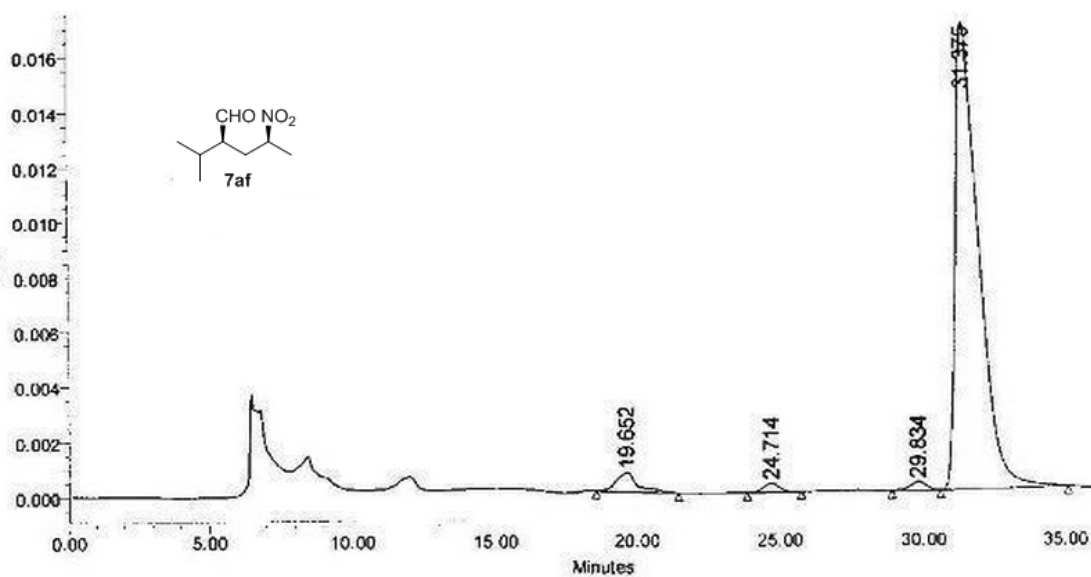

|   | RT (min) | Area ( $\mu\text{V}\cdot\text{sec}$ ) | % Area | Height ( $\mu\text{V}$ ) | % Height |
|---|----------|---------------------------------------|--------|--------------------------|----------|
| 1 | 19.652   | 36419                                 | 3.57   | 703                      | 3.83     |
| 2 | 24.714   | 12589                                 | 1.23   | 332                      | 1.81     |
| 3 | 29.834   | 11961                                 | 1.17   | 311                      | 1.69     |
| 4 | 31.375   | 959150                                | 94.02  | 17004                    | 92.66    |

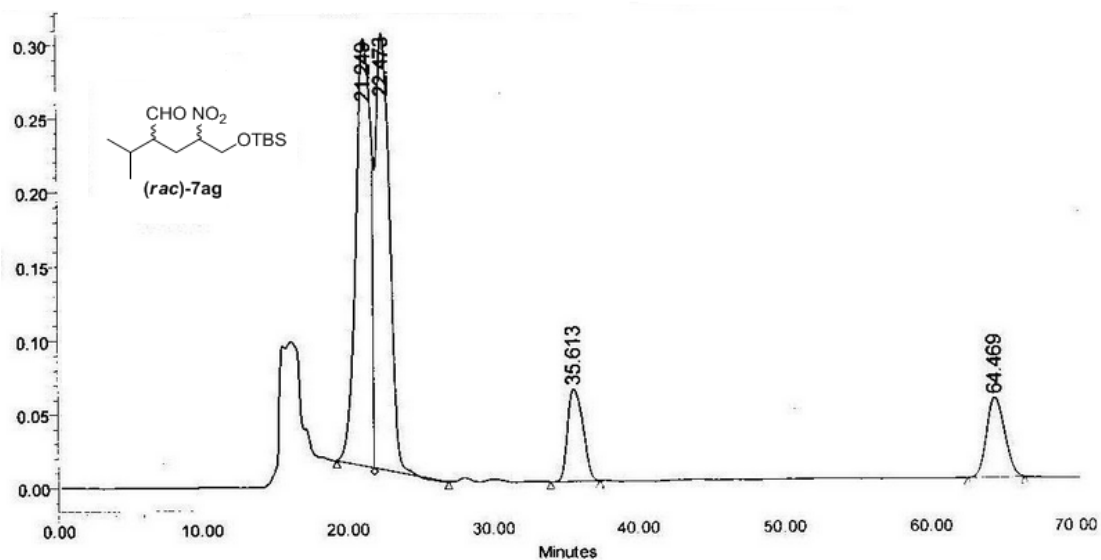

|   | RT (min) | Area (μV*sec) | % Area | Height (μV) | % Height |
|---|----------|---------------|--------|-------------|----------|
| 1 | 21.249   | 20332764      | 40.60  | 290006      | 41.24    |
| 2 | 22.473   | 20430966      | 40.79  | 295879      | 42.07    |
| 3 | 35.613   | 4616772       | 9.22   | 62811       | 8.93     |
| 4 | 64.469   | 4703187       | 9.39   | 54551       | 7.76     |

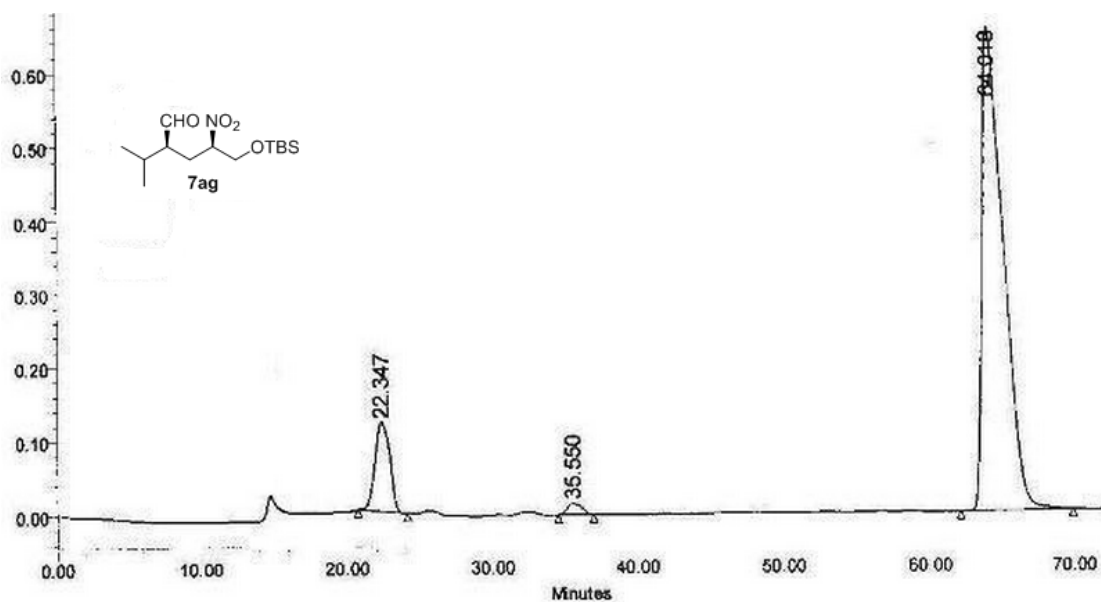

|   | RT (min) | Area (μV*sec) | % Area | Height (μV) | % Height |
|---|----------|---------------|--------|-------------|----------|
| 1 | 22.347   | 8342000       | 10.92  | 119796      | 15.12    |
| 2 | 35.550   | 1077897       | 1.41   | 15123       | 1.91     |
| 3 | 64.018   | 67005261      | 87.67  | 657529      | 82.97    |



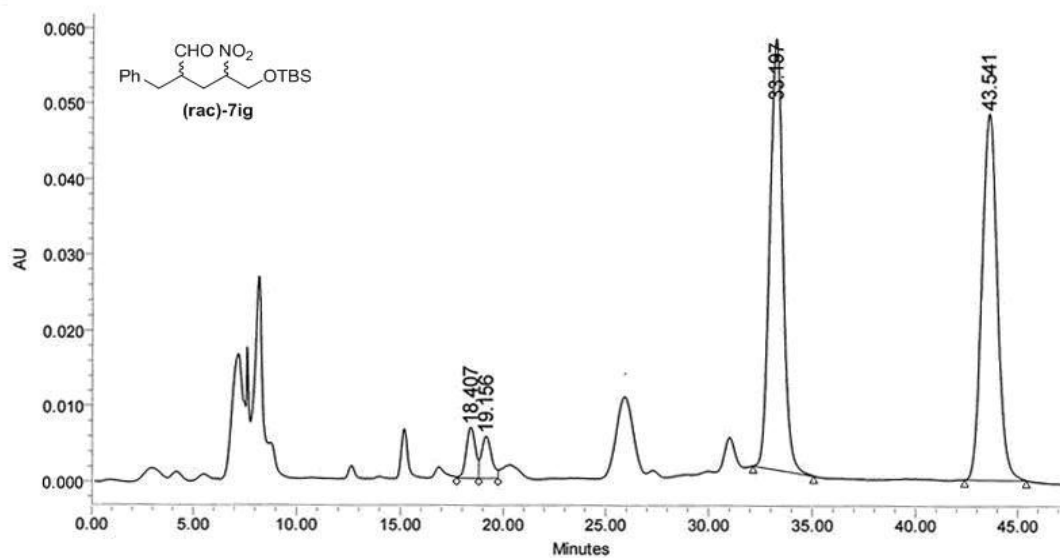

|   | RT (min) | Area (μV*sec) | % Area | Height (μV) | % Height |
|---|----------|---------------|--------|-------------|----------|
| 1 | 18.407   | 207760        | 3.82   | 6656        | 5.66     |
| 2 | 19.156   | 186381        | 3.43   | 5490        | 4.67     |
| 3 | 33.197   | 2500736       | 45.96  | 57027       | 48.50    |
| 4 | 43.541   | 2545895       | 46.79  | 48417       | 41.17    |

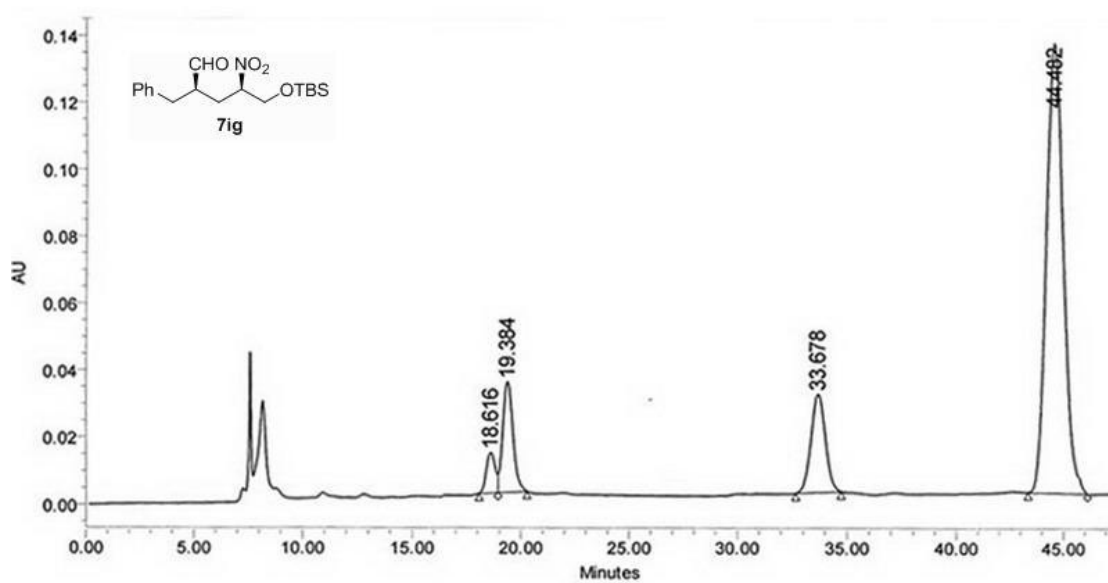

|   | RT (min) | Area (μV*sec) | % Area | Height (μV) | % Height |
|---|----------|---------------|--------|-------------|----------|
| 1 | 18.616   | 338112        | 3.33   | 11810       | 5.68     |
| 2 | 19.384   | 1078921       | 10.64  | 32713       | 15.73    |
| 3 | 33.678   | 1311746       | 12.94  | 29089       | 13.99    |
| 4 | 44.482   | 7411369       | 73.09  | 134291      | 64.59    |

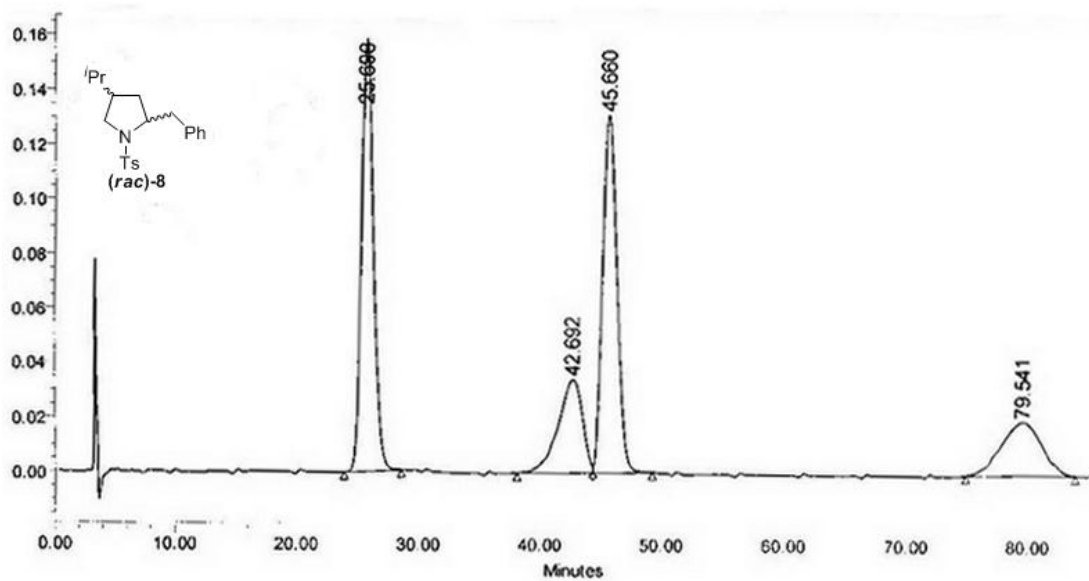

|   | RT (min) | Area ( $\mu\text{V}\cdot\text{sec}$ ) | % Area | Height ( $\mu\text{V}$ ) | % Height |
|---|----------|---------------------------------------|--------|--------------------------|----------|
| 1 | 25.690   | 10730614                              | 34.79  | 158388                   | 46.11    |
| 2 | 42.692   | 4743096                               | 15.38  | 33899                    | 9.87     |
| 3 | 45.660   | 10777369                              | 34.94  | 131573                   | 38.30    |
| 4 | 79.541   | 4590745                               | 14.88  | 19637                    | 5.72     |

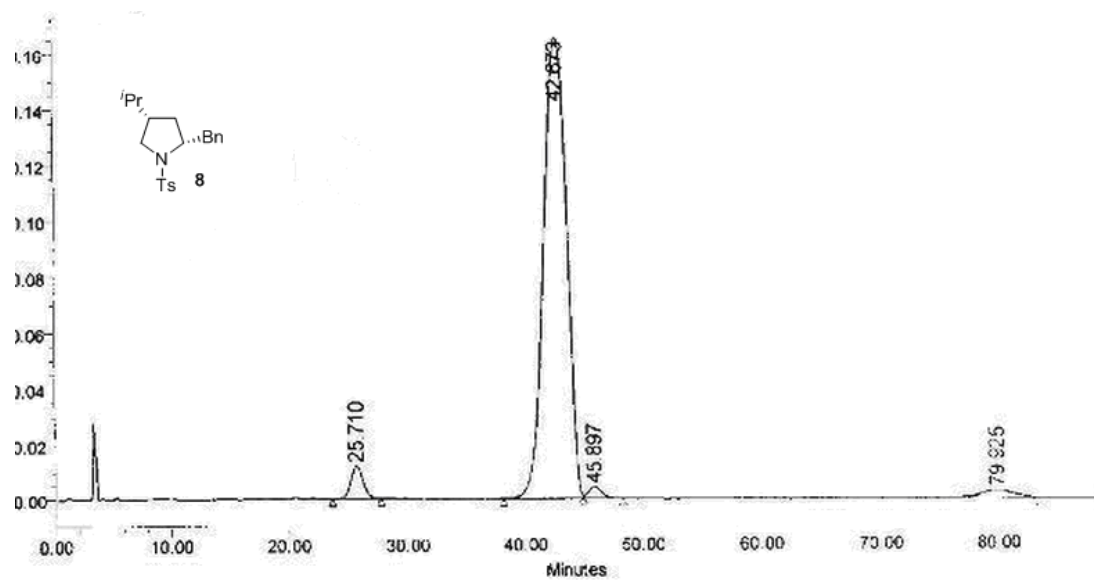

|   | RT (min) | Area ( $\mu\text{V}\cdot\text{sec}$ ) | % Area | Height ( $\mu\text{V}$ ) | % Height |
|---|----------|---------------------------------------|--------|--------------------------|----------|
| 1 | 25.710   | 845499                                | 3.51   | 12094                    | 6.55     |
| 2 | 42.673   | 22503321                              | 93.31  | 165833                   | 89.82    |
| 3 | 45.897   | 317559                                | 1.32   | 4164                     | 2.26     |
| 4 | 79.925   | 449807                                | 1.87   | 2537                     | 1.37     |
